# Supplementary material
Source: publisher figshare collection journal article supplement (https://karger.figshare.com/ndownloader/files/22459895)
Supplement: Supplementary file 1 [file 22459895]

## Sheet: Sheet1
Table A: The 894 genes, which were up-regulated in SRNS patients compared with SSNS patients, were analyzed by using Enrichr KEGG program.
Term	Overlap	P-value	Adjusted P-value	Z-score	Combined Score	Genes
HSA00380 TRYPTOPHAN METABOLISM	21/60	3.97947e-05	0.00331925	-1.99765	11.4026	AADAT;DDC;KYNU;EHHADH;OGDHL;MAOB;ACMSD;ECHS1;KMO;OGDH;ACAT1;ALDH3A2;AFMID;ABP1;ALDH7A1;ALDH1B1;ALDH1A3;HAAO;ALDH2;CAT;HADH
HSA00410 BETA ALANINE METABOLISM	13/25	5.5291e-05	0.00331925	-1.94796	11.119	ABP1;ALDH7A1;ACADM;ALDH1B1;EHHADH;UPB1;ALDH1A3;ALDH2;ABAT;DPYS;ECHS1;HIBCH;ALDH3A2
HSA00310 LYSINE DEGRADATION	18/47	5.53208e-05	0.00331925	-1.91976	10.958	AADAT;SHMT1;EHHADH;OGDHL;SUV39H1;AASS;ECHS1;OGDH;ACAT1;PIPOX;BBOX1;ALDH3A2;ALDH7A1;PLOD1;ALDH1B1;ALDH1A3;ALDH2;HADH
HSA00280 VALINE LEUCINE AND ISOLEUCINE DEGRADATION	17/44	8.14868e-05	0.0036669	-1.82728	10.2481	ACAA2;ALDH6A1;ACADM;EHHADH;ECHS1;ACAT1;ALDH3A2;AUH;ALDH7A1;IVD;ALDH1B1;ALDH1A3;ALDH2;ABAT;HIBCH;HADH;HMGCL
HSA00640 PROPANOATE METABOLISM	14/34	0.00020399	0.00734365	-1.59129	7.81948	ALDH6A1;ACADM;SUCLG2;EHHADH;SUCLG1;ECHS1;ACAT1;ALDH3A2;ALDH7A1;ALDH1B1;ALDH1A3;ALDH2;ABAT;HIBCH
HSA00260 GLYCINE SERINE AND THREONINE METABOLISM	16/45	0.000285273	0.0085582	-1.56298	7.44112	SHMT1;CHDH;GATM;MAOB;GCAT;PSPH;PIPOX;GLDC;ABP1;BHMT;DMGDH;DAO;AGXT2;PSAT1;SARDH;CBS
HSA00561 GLYCEROLIPID METABOLISM	18/58	0.000477572	0.0112122	-1.49697	6.72254	ADHFE1;PPAP2C;DAK;ADH5;ADH6;PNPLA3;ALDH3A2;ALDH7A1;AGPAT6;DGKB;AKR1A1;ALDH1B1;ALDH1A3;LIPG;ALDH2;MGLL;PPAP2B;AGPAT3
HSA00020 CITRATE CYCLE	12/29	0.000558752	0.0112122	-0.937299	4.20918	ACO2;SUCLG2;ACO1;SUCLG1;OGDHL;IDH1;PCK2;OGDH;CLYBL;PC;PCK1;MDH1
HSA00340 HISTIDINE METABOLISM	13/41	0.00244976	0.0314969	-0.774264	2.6773	DDC;AMDHD1;ABP1;ALDH7A1;ASPA;HNMT;ACY3;ALDH1B1;ALDH1A3;MAOB;ALDH2;ALDH3B2;ALDH3A2
HSA00650 BUTANOATE METABOLISM	13/45	0.0047708	0.0572497	-0.878206	2.51196	ALDH7A1;L2HGDH;ALDH1B1;EHHADH;ALDH1A3;ALDH2;ABAT;ECHS1;BDH2;HADH;ACAT1;ALDH3A2;HMGCL
HSA00220 UREA CYCLE AND METABOLISM OF AMINO GROUPS	11/30	0.00207285	0.028701	-0.471229	1.67325	ABP1;ALDH7A1;GATM;ASS1;ALDH1B1;ALDH1A3;MAOB;SAT2;ALDH2;AGMAT;ALDH3A2
HSA00980 METABOLISM OF XENOBIOTICS BY CYTOCHROME P450	16/70	0.0122993	0.107897	-0.710911	1.5829	GSTA1;CYP3A5;GSTA2;ADHFE1;CYP2B6;CYP2C8;ADH5;EPHX1;ALDH3B2;ADH6;CYP2E1;ALDH1A3;GSTK1;UGT2B10;UGT2B7;MGST2
HSA00620 PYRUVATE METABOLISM	12/42	0.00708563	0.0797133	-0.613911	1.55278	HAGH;ALDH7A1;ALDH1B1;ALDH1A3;PKLR;ALDH2;PCK2;ACAT1;ALDH3A2;PC;PCK1;MDH1
HSA03320 PPAR SIGNALING PATHWAY	16/70	0.0122993	0.107897	-0.639005	1.42279	ACOX2;PPARA;ACOX1;ACADM;OLR1;EHHADH;RXRA;PCK2;PCK1;CYP27A1;APOC3;FABP3;FABP1;SCP2;SLC27A2;PLTP
HSA00010 GLYCOLYSIS AND GLUCONEOGENESIS	15/64	0.012588	0.107897	-0.542011	1.20683	ADHFE1;ALDOB;ADH5;FBP1;ADH6;ALDH3B2;ALDH3A2;G6PC;GALM;ALDH7A1;AKR1A1;ALDH1B1;ALDH1A3;PKLR;ALDH2
HSA00120 BILE ACID BIOSYNTHESIS	11/38	0.00902293	0.0955369	-0.343455	0.806515	ACAA2;ALDH7A1;CYP27A1;ADHFE1;ALDH1B1;ALDH1A3;ALDH2;ADH5;ADH6;ACAD8;ALDH3A2
HSA00120 BILE ACID BIOSYNTHESIS	10/33	0.00974254	0.0974254	-0.051456	0.119824	ADSSL1;ASPA;ASS1;ACY3;ABAT;AGXT2;CRAT;DDO;GPT2;PC
Table B: The 2331 genes, which were down-regulated in SRNS patients compared with SSNS patients, were analyzed by using Enrichr KEGG program.
Term	Overlap	P-value	Adjusted P-value	Z-score	Combined Score	Genes
HSA04510 FOCAL ADHESION	19/200	0.81134	0.999768	5.61318	-0.00130285	FLT1;PDGFB;TLN2;ITGA1;ITGB4;MAPK10;BIRC2;KDR;FARP2;IGF1R;CCND3;ITGA6;ITGA8;VEGFA;PDGFRB;MAPK8;LAMC2;PDGFC;PIK3R1
HSA04060 CYTOKINE CYTOKINE RECEPTOR INTERACTION	24/257	0.856719	0.999768	5.68152	-0.00131871	TNFRSF21;IL6;FLT1;PDGFB;TNFRSF12A;TGFBR1;CCR1;IL25;TNFSF15;EDA2R;KIT;CCL28;CCL18;KDR;IL11;TNFRSF10C;PRLR;CLCF1;VEGFA;PDGFRB;PDGFC;BMPR1B;GHR;ACVR1
HSA05222 SMALL CELL LUNG CANCER	8/87	0.769625	0.999768	5.6933	-0.00132144	FHIT;ITGA6;RXRA;PIAS2;LAMC2;MYC;BIRC2;PIK3R1
HSA04110 CELL CYCLE	10/115	0.836808	0.999768	5.91912	-0.00137386	CDC7;CDC14A;CCND3;CCNH;PLK1;ATR;SFN;SMC1A;GADD45B;GADD45A
HSA00240 PYRIMIDINE METABOLISM	7/89	0.873917	0.999768	6.74986	-0.00156667	POLD3;RRM2;UPB1;ENTPD5;DPYS;UPP2;NT5E
HSA05212 PANCREATIC CANCER	6/73	0.832451	0.999768	6.87226	-0.00159508	PLD1;TGFBR1;VEGFA;MAPK8;MAPK10;PIK3R1
HSA04512 ECM RECEPTOR INTERACTION	7/87	0.859865	0.999768	6.88899	-0.00159897	FNDC4;ITGA6;ITGA8;ITGA1;ITGB4;LAMC2;AGRN
HSA04520 ADHERENS JUNCTION	6/75	0.849699	0.999768	7.13401	-0.00165584	IGF1R;PVRL4;TGFBR1;SSX2IP;SNAI2;FARP2
HSA04664 FC EPSILON RI SIGNALING PATHWAY	5/75	0.923223	0.999768	7.89943	-0.00183349	PLA2G12B;PLCG2;MAPK8;MAPK10;PIK3R1
HSA04350 TGF BETA SIGNALING PATHWAY	5/90	0.972387	0.999768	7.92109	-0.00183852	TGFBR1;DCN;BMPR1B;MYC;ACVR1
HSA04660 T CELL RECEPTOR SIGNALING PATHWAY	3/93	0.997893	0.999768	8.44449	-0.00196	PPP3CB;NFATC3;PIK3R1
HSA04150 MTOR SIGNALING PATHWAY	4/48	0.793285	0.999768	8.79137	-0.00204052	RPS6KA3;EIF4EBP1;VEGFA;PIK3R1
HSA03010 RIBOSOME	2/98	0.999768	0.999768	8.9598	-0.00207961	RPS28;RPS4Y1
HSA05211 RENAL CELL CARCINOMA	4/69	0.949727	0.999768	9.22774	-0.0021418	EPAS1;PDGFB;VEGFA;PIK3R1
HSA05220 CHRONIC MYELOID LEUKEMIA	3/76	0.990466	0.999768	9.29232	-0.00215679	TGFBR1;MYC;PIK3R1
HSA00150 ANDROGEN AND ESTROGEN METABOLISM	4/54	0.858274	0.999768	9.51981	-0.00220959	ARSE;SULT2B1;UGT2B10;UGT2B7
HSA04340 HEDGEHOG SIGNALING PATHWAY	4/57	0.883668	0.999768	9.66603	-0.00224353	PRKY;WNT7B;LRP2;GLI3
HSA04742 TASTE TRANSDUCTION	3/53	0.935913	0.999768	11.0294	-0.00255997	PRKY;ADCY8;ITPR3
HSA04330 NOTCH SIGNALING PATHWAY	3/47	0.898437	0.999768	11.8962	-0.00276115	MFNG;DTX1;DLL4
HSA05213 ENDOMETRIAL CANCER	2/52	0.979359	0.999768	11.9839	-0.00278153	MYC;PIK3R1
HSA04740 OLFACTORY TRANSDUCTION	3/31	0.69043	0.999768	12.0943	-0.00280715	PRKY;CAMK2G;CALM1
HSA04130 SNARE INTERACTIONS IN VESICULAR TRANSPORT	3/36	0.776782	0.999768	12.8068	-0.00297252	STX3;STX7;GOSR2
HSA04940 TYPE I DIABETES MELLITUS	2/45	0.96071	0.999768	12.9181	-0.00299835	HSPD1;HLA-DQA1
HSA05219 BLADDER CANCER	2/42	0.948487	0.999768	13.2842	-0.00308332	VEGFA;MYC
HSA00350 TYROSINE METABOLISM	13/59	0.0286456	0.184151	0.00200081	-0.00338537	DDC;ESCO1;ADHFE1;MAOB;ADH5;ADH6;HGD;ALDH3B2;PNPLA3;FAH;ABP1;ALDH1A3;HPD
HSA04120 UBIQUITIN MEDIATED PROTEOLYSIS	1/40	0.988221	0.999768	17.0479	-0.0039569	UBE2C
HSA00970 AMINOACYL TRNA BIOSYNTHESIS	1/38	0.985357	0.999768	17.2102	-0.00399457	FARS2
HSA04140 REGULATION OF AUTOPHAGY	1/30	0.965064	0.999768	18.8773	-0.00438151	ATG7
HSA03030 DNA POLYMERASE	1/25	0.939892	0.999768	22.7708	-0.00528522	POLD3
HSA05050 DENTATORUBROPALLIDOLUYSIAN ATROPHY	1/15	0.822402	0.999768	27.1061	-0.00629146	MAGI2
HSA00140 C21 STEROID HORMONE METABOLISM	1/11	0.72626	0.999768	32.3499	-0.00750856	CYP17A1
HSA04010 MAPK SIGNALING PATHWAY	30/257	0.477563	0.941515	2.89859	-0.174683	FGF6;FGF18;FGF8;PDGFB;FGF14;PPM1A;PRKY;MAP3K5;RASGRP3;MAPT;PLA2G12B;PPP3CB;FGF1;FGF2;MYC;FGF3;CACNA2D1;TGFBR1;MAPK10;CACNA2D2;RPS6KA3;DUSP2;RASGRF2;PDGFRB;MAPK8;GADD45B;DUSP9;MAP3K13;GADD45A;CD14
HSA04640 HEMATOPOIETIC CELL LINEAGE	11/88	0.432652	0.941515	2.95528	-0.178099	CR1;IL6;TFRC;ITGA6;GYPA;ITGA1;MME;ANPEP;KIT;CD14;IL11
HSA00500 STARCH AND SUCROSE METABOLISM	10/84	0.497184	0.941515	3.64076	-0.21941	G6PC;ENPP1;ENPP3;MGAM;UGDH;UGT2B10;AMY2B;AMY1A;UGT2B7;UGP2
HSA00230 PURINE METABOLISM	18/145	0.400717	0.909927	2.36551	-0.223283	FHIT;GDA;ADSSL1;ENPP1;ADCY8;ENPP3;AK2;PDE3B;PDE10A;POLD3;ADCY9;PDE7A;PDE4A;RRM2;PKLR;ENTPD5;PDE8A;NT5E
HSA05210 COLORECTAL CANCER	10/85	0.511187	0.941515	3.83772	-0.23128	IGF1R;MSH3;TGFBR1;PDGFRB;FZD3;MAPK8;MAPK10;FZD5;MYC;PIK3R1
HSA04910 INSULIN SIGNALING PATHWAY	15/135	0.577428	0.941515	3.99741	-0.240903	SOCS3;PHKA1;FBP1;PDE3B;PDE3A;MAPK10;PCK2;PCK1;PRKY;EIF4EBP1;G6PC;PKLR;MAPK8;PIK3R1;CALM1
HSA05120 EPITHELIAL CELL SIGNALING IN HELICOBACTER PYLORI INFECTION	9/68	0.388	0.909927	3.49599	-0.329991	ATP6V1C2;PLCG2;ATP6V0A1;MAPK8;MAPK10;ATP6V1G3;ATP6V1B2;ATP6V1D;ATP6V0D2
HSA05131 PATHOGENIC ESCHERICHIA COLI INFECTION EPEC	6/53	0.569219	0.941515	6.61562	-0.398689	ARHGEF2;KRT18;TUBAL3;TUBB6;TUBA3E;CD14
HSA00790 FOLATE BIOSYNTHESIS	5/42	0.533127	0.941515	7.96812	-0.480197	ALPL;QDPR;GGH;ALPP;GCH1
HSA04930 TYPE II DIABETES MELLITUS	6/44	0.404412	0.909927	5.16762	-0.487778	SOCS3;SLC2A2;PKLR;MAPK8;MAPK10;PIK3R1
HSA01032 GLYCAN STRUCTURES DEGRADATION	4/30	0.463878	0.941515	9.0642	-0.546252	ARSB;HEXA;FUCA2;NEU4
HSA00641 3 CHLOROACRYLIC ACID DEGRADATION	8/15	0.00137341	0.0224741	0.147164	-0.558546	ALDH7A1;ADHFE1;ALDH1B1;ALDH1A3;ALDH2;ADH5;ADH6;ALDH3A2
HSA04610 COMPLEMENT AND COAGULATION CASCADES	10/69	0.28505	0.780266	2.54178	-0.630668	CR1;C4A;F13A1;SERPINA5;KLKB1;C5;SERPINE1;PROS1;PLG;F2R
HSA00960 ALKALOID BIOSYNTHESIS II	3/21	0.45066	0.941515	11.487	-0.692263	ESCO1;ABP1;PNPLA3
HSA05010 ALZHEIMERS DISEASE	3/28	0.627677	0.941515	14.0868	-0.848938	APOE;MAPT;MME
HSA05218 MELANOMA	12/71	0.136249	0.490495	1.27352	-0.907179	FGF6;FGF18;IGF1R;FGF8;PDGFB;FGF14;PDGFRB;PDGFC;FGF1;FGF2;PIK3R1;FGF3
HSA00590 ARACHIDONIC ACID METABOLISM	11/54	0.0630348	0.315174	0.825643	-0.953313	PTGIS;CYP2B6;PTGES;CYP2C8;GPX4;GPX3;PLA2G12B;EPHX2;CYP4F3;CYP4F2;CYP2E1
HSA00533 KERATAN SULFATE BIOSYNTHESIS	2/16	0.562633	0.941515	17.4625	-1.05237	ST3GAL1;B4GALT4
HSA00531 GLYCOSAMINOGLYCAN DEGRADATION	2/17	0.592774	0.941515	18.3615	-1.10655	ARSB;HEXA
HSA01040 POLYUNSATURATED FATTY ACID BIOSYNTHESIS	2/14	0.497691	0.941515	18.7495	-1.12993	ACOX1;ELOVL2
HSA00592 ALPHA LINOLENIC ACID METABOLISM	2/15	0.530927	0.941515	18.8631	-1.13678	ACOX1;PLA2G12B
HSA00626 NAPHTHALENE AND ANTHRACENE DEGRADATION	2/18	0.621338	0.941515	18.9312	-1.14089	DHRS1;DHRS3
HSA05020 PARKINSONS DISEASE	2/17	0.592774	0.941515	19.733	-1.1892	SNCAIP;PARK2
HSA00920 SULFUR METABOLISM	2/14	0.497691	0.941515	20.8772	-1.25816	SUOX;SULT2B1
HSA00600 SPHINGOLIPID METABOLISM	6/39	0.309755	0.780266	5.31759	-1.31941	ARSE;PPAP2C;CERK;PPAP2B;DEGS2;NEU4
HSA05110 CHOLERA INFECTION	7/41	0.214534	0.665795	3.81786	-1.553	ATP6V1C2;ADCY9;PLCG2;ATP6V0A1;ATP6V1G3;ATP6V1D;ATP6V0D2
HSA00624 1 AND 2 METHYLNAPHTHALENE DEGRADATION	8/25	0.0156013	0.127647	0.974426	-2.00585	DHRS1;ESCO1;DHRS3;ADHFE1;ADH5;ADH6;ACAD8;PNPLA3
HSA00460 CYANOAMINO ACID METABOLISM	1/8	0.621428	0.941515	35.2717	-2.12564	SHMT1
HSA00053 ASCORBATE AND ALDARATE METABOLISM	7/9	0.000560609	0.0112122	0.480581	-2.15817	ALDH7A1;ALDH1B1;ALDH1A3;MIOX;UGDH;ALDH2;ALDH3A2
HSA00632 BENZOATE DEGRADATION VIA COA LIGATION	8/28	0.02593	0.179515	1.27382	-2.18777	DHRS1;ESCO1;DHRS3;EHHADH;FN3K;ECHS1;PNPLA3;ACAT1
HSA00232 CAFFEINE METABOLISM	1/7	0.578241	0.941515	38.5267	-2.32181	NAT2
HSA00602 GLYCOSPHINGOLIPID BIOSYNTHESIS NEO LACTOSERIES	4/21	0.248443	0.745329	8.26677	-2.42984	FUT6;ST3GAL6;B3GNT3;B4GALT4
HSA00251 GLUTAMATE METABOLISM	6/31	0.170992	0.569973	4.45064	-2.502	GLUD1;GLS;GFPT2;ABAT;ALDH4A1;GPT2
HSA00730 THIAMINE METABOLISM	1/8	0.621428	0.941515	41.5384	-2.5033	NFS1
HSA00604 GLYCOSPHINGOLIPID BIOSYNTHESIS GANGLIOSERIES	3/16	0.306437	0.780266	11.3071	-2.80553	ST3GAL1;ST6GALNAC3;HEXA
HSA00740 RIBOFLAVIN METABOLISM	3/16	0.306437	0.780266	12.5794	-3.12121	ENPP1;ENPP3;ACP5
HSA00760 NICOTINATE AND NICOTINAMIDE METABOLISM	6/24	0.0789935	0.37418	3.96351	-3.89621	ENPP1;BST1;ENPP3;QPRT;NT5E;NNMT
HSA00040 PENTOSE AND GLUCURONATE INTERCONVERSIONS	6/25	0.0899269	0.385401	4.22646	-4.02981	UGDH;UGT2B10;UGT2B7;DCXR;UGP2;XYLB
HSA00710 CARBON FIXATION	5/23	0.151318	0.523792	6.30144	-4.07489	ALDOB;PKLR;FBP1;GPT2;MDH1
HSA00400 PHENYLALANINE TYROSINE AND TRYPTOPHAN BIOSYNTHESIS	2/9	0.312106	0.780266	21.0381	-5.21998	FARS2;PAH
HSA00770 PANTOTHENATE AND COA BIOSYNTHESIS	6/16	0.0198468	0.148851	3.05533	-5.81983	ENPP1;PANK1;UPB1;ENPP3;DPYS;VNN1
HSA00642 ETHYLBENZENE DEGRADATION	4/15	0.121767	0.456626	8.16516	-6.40058	DHRS1;ESCO1;DHRS3;PNPLA3
HSA00785 LIPOIC ACID METABOLISM	1/3	0.350441	0.852425	43.0008	-6.86594	LIAS
HSA00630 GLYOXYLATE AND DICARBOXYLATE METABOLISM	5/14	0.0378953	0.219622	5.61675	-8.51415	ACO2;ACO1;HAO2;AFMID;MDH1
HSA00072 SYNTHESIS AND DEGRADATION OF KETONE BODIES	3/9	0.116355	0.456626	11.4058	-8.94086	BDH2;ACAT1;HMGCL
HSA00680 METHANE METABOLISM	4/10	0.0470303	0.242442	7.48141	-10.6011	SHMT1;MTHFR;ADH5;CAT
HSA00300 LYSINE BIOSYNTHESIS	2/4	0.118552	0.456626	14.4235	-11.3065	AADAT;AASS
HSA00031 INOSITOL METABOLISM	1/2	0.276431	0.780266	53.7506	-13.3367	ALDH6A1
HSA00750 VITAMIN B6 METABOLISM	3/5	0.0401846	0.219622	11.7984	-17.8845	PDXP;PNPO;PSAT1
HSA00643 STYRENE DEGRADATION	2/3	0.0846229	0.380803	21.6423	-20.8951	HGD;FAH
HSA00472 D ARGININE AND D ORNITHINE METABOLISM	1/1	0.194008	0.612657	75.6216	-37.0508	DAO
Table C: The 894 genes, which were up-regulated in SRNS patients compared with SSNS patients, were analyzed by using Enrichr GO Biological Process program.
Term	Overlap	P-value	Adjusted P-value	Z-score	Combined Score	Genes
cellular amino acid metabolic process (GO:0006520)	106/421	0	0	-2.37178	78.8059	NIT2;SLC7A8;GCAT;SLC7A9;BPHL;OGDH;GLDC;FAH;SLC7A7;ASPA;PLOD1;ATG7;VNN1;DAO;GPT2;DDAH1;HMGCL;AADAT;ALDH6A1;GATM;PCBD1;QDPR;CDO1;HNF4A;BHMT;ABAT;ASS1;FARS2;GLUD1;FN3K;KMO;PAH;AGMAT;ACAT1;IVD;GSTK1;GCSH;IDH1;ALDH4A1;ADSSL1;BHMT2;UPB1;ACMSD;GGH;HGD;ATP7A;TST;SLC7A2;GLS;SLC25A10;PRODH2;THNSL2;AGXT2;DIO1;SLC25A16;KYNU;PSPH;AFMID;AUH;MSRA;P4HA2;P4HA1;GPX4;ACAD8;SARDH;DPEP1;HPD;GHR;SUOX;DDC;PEPD;SLC3A1;D…
small molecule catabolic process (GO:0044282)	81/261	0	0	-2.35879	78.697	ACOX2;ACOX1;CYP24A1;KYNU;EHHADH;SYNJ1;GCAT;PEX5;OGDH;GLDC;AUH;FAH;AFMID;ASPA;APOE;SMPDL3A;MIOX;DAO;ACAD8;HADH;DDAH1;SARDH;GPT2;HMGCL;HPD;AADAT;SUOX;ALDH6A1;ACADM;PCBD1;QDPR;ALDH3B2;CDO1;DDO;ALDH7A1;ALDH1B1;ABAT;PCYOX1;SLC27A2;HACL1;SORD;GLUD1;ADH5;AASS;ECHS1;KMO;PAH;ACAT1;PIPOX;AKR1A1;IVD;HAAO;DMGDH;ALDH4A1;GCSH;BDH2;ENOSF1;ECI2;SHMT1;ACMSD;NPL;HGD;CRAT;PHYH;IDNK;TST;AMDHD1;SLC25A10;GLS;ALDH2;PRO…
carboxylic acid catabolic process (GO:0046395)	70/200	0	0	-2.27374	75.8594	ACOX2;ACOX1;KYNU;EHHADH;GCAT;PEX5;OGDH;GLDC;AUH;FAH;AFMID;ASPA;DAO;ACAD8;HADH;DDAH1;SARDH;GPT2;HMGCL;HPD;AADAT;ALDH6A1;SUOX;ACADM;PCBD1;QDPR;CDO1;DDO;ALDH7A1;ABAT;PCYOX1;SLC27A2;HACL1;GLUD1;AASS;ECHS1;KMO;PAH;ACAT1;PIPOX;AKR1A1;IVD;HAAO;DMGDH;ALDH4A1;GCSH;BDH2;ENOSF1;ECI2;SHMT1;ACMSD;NPL;HGD;CRAT;PHYH;IDNK;TST;AMDHD1;GLS;SLC25A10;PRODH2;CYP4F3;AGXT2;THNSL2;QPRT;CYP4F2;HIBCH;ACAD11;SCP2;CBS
organic acid catabolic process (GO:0016054)	70/200	0	0	-2.27132	75.7784	ACOX2;ACOX1;KYNU;EHHADH;GCAT;PEX5;OGDH;GLDC;AUH;FAH;AFMID;ASPA;DAO;ACAD8;HADH;DDAH1;SARDH;GPT2;HMGCL;HPD;AADAT;ALDH6A1;SUOX;ACADM;PCBD1;QDPR;CDO1;DDO;ALDH7A1;ABAT;PCYOX1;SLC27A2;HACL1;GLUD1;AASS;ECHS1;KMO;PAH;ACAT1;PIPOX;AKR1A1;IVD;HAAO;DMGDH;ALDH4A1;GCSH;BDH2;ENOSF1;ECI2;SHMT1;ACMSD;NPL;HGD;CRAT;PHYH;IDNK;TST;AMDHD1;GLS;SLC25A10;PRODH2;CYP4F3;AGXT2;THNSL2;QPRT;CYP4F2;HIBCH;ACAD11;SCP2;CBS
alpha-amino acid metabolic process (GO:1901605)	69/213	0	9e-14	-2.27459	68.2657	KYNU;NIT2;GCAT;PSPH;OGDH;GLDC;AUH;FAH;AFMID;MSRA;ASPA;PLOD1;P4HA2;P4HA1;DAO;ACAD8;DDAH1;SARDH;GPT2;HMGCL;DPEP1;GHR;HPD;AADAT;ALDH6A1;GATM;PCBD1;QDPR;CDO1;DDO;ALDH7A1;FOLH1;HNF4A;BHMT;ASS1;GLUD1;NFS1;AASS;KMO;PAH;AGMAT;PIPOX;GCH1;MTHFS;MTHFR;IVD;HAAO;DMGDH;ALDH4A1;GCSH;NOX4;SHMT1;BHMT2;ADSSL1;GGH;ACMSD;HGD;ADI1;ATP7A;AMDHD1;GLYAT;GLS;GFPT2;PRODH2;AGXT2;THNSL2;HIBCH;PSAT1;CBS
cellular amino acid catabolic process (GO:0009063)	49/117	0	8.5e-13	-2.19605	61.0304	KYNU;GCAT;OGDH;FAH;AFMID;AUH;GLDC;ASPA;DAO;ACAD8;GPT2;SARDH;DDAH1;HMGCL;HPD;AADAT;ALDH6A1;SUOX;PCBD1;QDPR;CDO1;DDO;ALDH7A1;ABAT;PCYOX1;GLUD1;AASS;KMO;PAH;ACAT1;PIPOX;IVD;HAAO;GCSH;ALDH4A1;DMGDH;ENOSF1;SHMT1;ACMSD;HGD;TST;AMDHD1;GLS;SLC25A10;PRODH2;THNSL2;AGXT2;HIBCH;CBS
alpha-amino acid catabolic process (GO:1901606)	42/92	1e-14	7.98e-12	-2.18496	55.8347	KYNU;GLUD1;GCAT;AASS;KMO;PAH;OGDH;PIPOX;GLDC;AUH;AFMID;FAH;ASPA;IVD;HAAO;DMGDH;ALDH4A1;GCSH;DAO;ACAD8;DDAH1;SARDH;GPT2;HMGCL;HPD;AADAT;SHMT1;ALDH6A1;PCBD1;ACMSD;QDPR;HGD;CDO1;DDO;AMDHD1;ALDH7A1;GLS;PRODH2;AGXT2;THNSL2;HIBCH;CBS
anion transport (GO:0006820)	92/443	9.52e-12	5.2332e-09	-2.30367	43.927	PPARA;SLC36A1;SLC36A2;SLC22A13;LDLR;SLC22A12;SLC16A10;ANO1;SLC7A8;SLC7A9;SLC22A11;SLC7A7;SLC23A1;SLC16A1;SLC35D1;APOE;SLC2A2;SLC22A4;SLC22A6;SLC4A1;SLC22A5;SLC4A4;ANO6;SLC43A2;IP6K2;ANO10;SLC12A6;SLC12A7;SLCO4A1;CA12;SLC22A7;PCTP;SLC22A8;SLC3A2;SLC34A1;SLC3A1;SLC9A3R1;SLC26A4;SLC26A6;NPC2;RHCG;SLC26A7;CLIC5;CA2;PCYOX1;SLC27A2;SLC38A5;SLC38A3;ENPP1;ENPP3;SLC38A6;ABCA1;ABCA4;SFXN5;FOLR3;SLCO1A2;PLI…
monocarboxylic acid metabolic process (GO:0032787)	95/473	2.17e-11	1.06041e-08	-2.33469	42.8697	ACOX2;SCPEP1;ALDH8A1;PPARA;ACOX1;KYNU;BTD;EHHADH;OGDHL;ECHDC2;PEX5;OGDH;ACSF2;BBOX1;CRYL1;SLC16A1;AGPAT6;PTGIS;P4HA2;SLC35D1;P4HA1;PTGES;GPX4;ELOVL2;DSEL;SLC22A4;MGLL;STRA6;DAO;HADH;DHTKD1;DPEP1;GHR;ACAA2;ACADM;ACSM2A;CBR4;LPIN2;CYP27A1;AS3MT;HAO2;PKLR;ABAT;THEM4;SLC27A2;UGP2;HACL1;ADPGK;PFKFB2;SLC37A4;ALDOB;UGDH;ECHS1;KMO;DCN;MTHFS;SLCO1A2;AKR1A1;ALB;ALDH1A3;PTPLA;HAAO;IDH1;ALDH4A1;BDH2;LIAS;ANG…
organic anion transport (GO:0015711)	73/328	1.002e-10	4.40691e-08	-2.31528	39.2151	PPARA;SLC36A1;SLC36A2;LDLR;SLC22A13;SLC22A12;SLC16A10;SLC7A8;SLC7A9;SLC22A11;SLC7A7;SLC23A1;SLC16A1;SLC35D1;APOE;SLC2A2;SLC22A4;SLC22A6;SLC4A1;SLC22A5;SLC4A4;SLC43A2;SLCO4A1;CA12;SLC22A7;PCTP;SLC22A8;SLC3A2;SLC3A1;SLC9A3R1;SLC26A6;NPC2;SLC26A7;CA2;SLC27A2;SLC38A5;SLC38A3;SLC38A6;ABCA1;ABCA4;SFXN5;FOLR3;SLCO1A2;PLIN2;ALB;SLC35B4;APOC3;HBB;SLC6A13;HBA1;SLC10A5;ATP11C;SLCO2B1;SLC10A2;SLC6A19;ABCG1;S…
organic hydroxy compound metabolic process (GO:1901615)	87/476	8.55275e-09	2.89346e-06	-2.32751	29.6828	ACOX2;CYP24A1;SNCAIP;LDLR;LGMN;DAK;SYNJ1;BBOX1;TTR;AGPAT6;APOE;SMPDL3A;MIOX;SLC22A4;DAO;CAT;FGF2;IP6K2;MINPP1;ACAA2;DDC;ACADM;RXRA;PCTP;PDXP;SLC34A1;ALDH3B2;LPIN2;CHPT1;RNF180;PLCE1;ALDH7A1;DHRS3;NPC2;CYP27A1;ALDH1B1;SLC27A2;DEGS2;ENPP6;ACHE;SORD;PFKFB2;SLC37A4;ADH5;ADH6;PAH;ABCA1;ALDH3A2;GCH1;SLCO1A2;ALB;OSBPL1A;ALDH1A3;APOC3;DMGDH;PNPO;PCYT1B;ANGPTL3;INPP5B;PLTP;NR1H4;CHDH;SHMT1;CUBN;EPAS1;MAOB…
dicarboxylic acid metabolic process (GO:0043648)	31/87	4.80031e-09	1.91925e-06	-2.23495	29.42	KYNU;ASS1;ADHFE1;NIT2;GLUD1;KMO;OGDH;MTHFR;ASPA;HAAO;ALDH4A1;IDH1;GPT2;GHR;AADAT;SHMT1;ADSSL1;SUCLG2;SUCLG1;ACMSD;PCK2;DDO;PCK1;AMDHD1;CYP17A1;L2HGDH;GLS;PRODH2;QPRT;PC;MDH1
organic acid transport (GO:0015849)	53/226	8.42244e-09	2.89346e-06	-2.29409	29.2566	SLC36A1;PPARA;SLC36A2;SLC22A13;SLC22A12;SLC16A10;SLC7A8;SLC7A9;SLC7A7;SLC16A1;SLC23A1;SLC35D1;APOE;SLC22A4;SLC22A6;SLC22A5;SLC43A2;SLC22A8;SLC3A2;SLC3A1;SLC9A3R1;SLC26A6;SLC26A7;SLC27A2;SLC38A5;SLC38A3;SLC38A6;SFXN5;FOLR3;SLCO1A2;PLIN2;ALB;SLC6A13;SLC10A5;SLCO2B1;SLC10A2;SLC6A19;SLC16A2;SLC6A9;SLC17A5;SLC16A5;SLC25A13;SLC16A4;SLC17A3;SLC7A2;GLS;SLC25A10;FABP3;SLC13A2;FABP1;SLC13A3;ABCC2;PDZK1
carboxylic acid transport (GO:0046942)	51/224	3.64877e-08	1.14623e-05	-2.28061	25.9452	SLC36A1;PPARA;SLC36A2;SLC22A13;SLC16A10;SLC7A8;SLC7A9;SLC7A7;SLC16A1;SLC23A1;SLC35D1;APOE;SLC22A4;SLC22A6;SLC22A5;SLC43A2;SLC22A8;SLC3A2;SLC3A1;SLC9A3R1;SLC26A6;SLC26A7;SLC27A2;SLC38A5;SLC38A3;SLC38A6;SFXN5;FOLR3;SLCO1A2;PLIN2;ALB;SLC6A13;SLC10A5;SLCO2B1;SLC10A2;SLC6A19;SLC16A2;SLC6A9;SLC17A5;SLC16A5;SLC25A13;SLC16A4;SLC7A2;GLS;SLC25A10;FABP3;SLC13A2;FABP1;SLC13A3;ABCC2;PDZK1
coenzyme metabolic process (GO:0006732)	46/196	7.92213e-08	2.32277e-05	-2.25108	24.0194	MOCOS;ASPDH;KYNU;ALDOB;NFS1;AASS;KMO;OGDH;PDSS1;PIPOX;GCH1;AFMID;GPD1L;MTHFS;GPHN;MTHFR;AGPAT6;FMO1;FMO2;ELOVL2;HAAO;PNPO;VNN1;IDH1;LIAS;HMGCL;MOCS1;AADAT;GPD1;SHMT1;BHMT2;PCBD1;SUCLG2;SUCLG1;ACSM2A;QDPR;PCK2;GLYAT;FOLH1;PANK1;BHMT;QPRT;CYP4F2;SLC25A16;DCXR;MDH1
sulfur compound metabolic process (GO:0006790)	62/314	1.20678e-07	3.12201e-05	-2.29031	23.7608	ARSB;KYNU;BTD;HEXA;SULT2B1;OGDH;ST3GAL1;AGPAT6;MSRA;SLC35D1;GPX4;GPC6;ST3GAL6;DSEL;ELOVL2;HMGCL;DPEP1;GHR;AADAT;SUOX;SUCLG2;SUCLG1;ACSM2A;CHST5;CDO1;NDNF;GLCE;HAGH;BHMT;PCYOX1;GAL3ST3;ENPP1;SPOCK2;LUM;NFS1;AASS;DCN;PIPOX;MTHFR;GSTK1;IDH1;SULT1C2;LIAS;B3GNT3;AGRN;B4GALT4;B4GALT5;NOX4;GSTA1;NAT8;GSTA2;BHMT2;SOD1;TST;ADI1;GLYAT;SULF2;SLC25A10;SULF1;PC;CBS;MGST2
cofactor metabolic process (GO:0051186)	54/255	1.15131e-07	3.12201e-05	-2.28879	23.7449	MOCOS;ASPDH;ALAD;KYNU;BTD;OGDH;AFMID;AGPAT6;HMOX1;ELOVL2;VNN1;HMGCL;AADAT;SUCLG2;PCBD1;SUCLG1;ACSM2A;QDPR;PDXP;CBR4;FOLH1;PANK1;BHMT;SLC25A38;MDH1;ALDOB;NFS1;AASS;KMO;PDSS1;PIPOX;GCH1;GPD1L;MTHFS;MTHFR;GPHN;FMO1;FMO2;HAAO;IDH1;PNPO;LIAS;BDH2;MOCS1;SHMT1;GPD1;BHMT2;PCK2;GLYAT;QPRT;CYP4F2;SLC25A16;DCXR;PC
transition metal ion homeostasis (GO:0055076)	32/120	7.26513e-07	0.000177511	-2.21457	19.1261	ATOX1;SFXN4;SFXN1;SFXN2;ATP6V1B2;NEO1;FTH1;SFXN5;HMOX1;SLC30A4;BDH2;SLC30A8;SLC31A1;ATP6V0D2;MYC;FTL;ACO1;PARK2;SOD1;ATP6V1D;LCN2;ATP7A;ATP6V1C2;TFRC;MT2A;FBXL5;ATP6V0A1;COMMD1;ATP6V1G3;PRNP;STEAP2;SLC40A1
aromatic amino acid family catabolic process (GO:0009074)	12/19	3.20295e-06	0.000658346	-2.48734	18.2217	AADAT;KYNU;PCBD1;HAAO;QDPR;ACMSD;HGD;PAH;KMO;HPD;AFMID;FAH
serine family amino acid metabolic process (GO:0009069)	15/32	3.29323e-06	0.000658346	-2.3974	17.5628	SHMT1;NFS1;GCAT;PSPH;CDO1;GLDC;GLYAT;GCSH;DMGDH;DAO;THNSL2;AGXT2;PSAT1;SARDH;CBS
organic acid biosynthetic process (GO:0016053)	52/272	2.85323e-06	0.000627425	-2.31705	17.0857	ALDH8A1;ACOX2;KYNU;PSPH;BBOX1;PTGIS;PLOD1;SLC35D1;PTGES;DSEL;ELOVL2;MGLL;RGN;GPT2;ACADM;GATM;CBR4;CDO1;HAGH;ALDH7A1;CYP27A1;PKLR;BHMT;SLC27A2;UGP2;ASS1;GLUD1;UGDH;KMO;PAH;DCN;GCH1;MTHFR;AKR1A1;ALDH1A3;PTPLA;HAAO;ALDH4A1;LIAS;SHMT1;CHDH;BHMT2;UPB1;ACSM3;ADI1;GLS;THNSL2;AGXT2;PSAT1;SCP2;MGST2;CBS
carboxylic acid biosynthetic process (GO:0046394)	52/272	2.85323e-06	0.000627425	-2.31473	17.0685	ALDH8A1;ACOX2;KYNU;PSPH;BBOX1;PTGIS;PLOD1;SLC35D1;PTGES;DSEL;ELOVL2;MGLL;RGN;GPT2;ACADM;GATM;CBR4;CDO1;HAGH;ALDH7A1;CYP27A1;PKLR;BHMT;SLC27A2;UGP2;ASS1;GLUD1;UGDH;KMO;PAH;DCN;GCH1;MTHFR;AKR1A1;ALDH1A3;PTPLA;HAAO;ALDH4A1;LIAS;SHMT1;CHDH;BHMT2;UPB1;ACSM3;ADI1;GLS;THNSL2;AGXT2;PSAT1;SCP2;MGST2;CBS
small molecule biosynthetic process (GO:0044283)	67/394	4.10047e-06	0.000751411	-2.32388	16.717	ACOX2;ALDH8A1;KYNU;PSPH;BBOX1;AGPAT6;PTGIS;SLC35D1;PLOD1;PTGES;ELOVL2;DSEL;MGLL;RGN;FGF2;GPT2;HMGCL;ACAA2;ACADM;GATM;CBR4;CDO1;LPIN2;CHPT1;HAGH;ALDH7A1;CYP27A1;BHMT;PKLR;SLC27A2;UGP2;ACHE;ASS1;GLUD1;UGDH;KMO;PAH;DCN;PDSS1;ACAT1;GCH1;MTHFR;AKR1A1;ALDH1A3;PTPLA;HAAO;ALDH4A1;PNPO;LIAS;PCYT1B;PLTP;CHDH;SHMT1;BHMT2;UPB1;PCK1;ADI1;ACSM3;GLS;PLCG2;AGXT2;THNSL2;CYP4F2;PSAT1;SCP2;CBS;MGST2
aspartate family amino acid metabolic process (GO:0009066)	17/42	3.61377e-06	0.000691015	-2.17358	15.8179	AADAT;ADSSL1;BHMT2;ASS1;NIT2;GCAT;AASS;OGDH;DDO;PIPOX;ADI1;ALDH7A1;MSRA;MTHFR;ASPA;PLOD1;BHMT
pyridine-containing compound metabolic process (GO:0072524)	20/61	7.09545e-06	0.00111449	-2.26767	15.4187	GPD1;ASPDH;KYNU;ALDOB;PDXP;ACMSD;KMO;PCK2;OGDH;AFMID;GPD1L;FMO1;FMO2;HAAO;PNPO;IDH1;QPRT;PSAT1;DCXR;MDH1
cellular modified amino acid metabolic process (GO:0006575)	41/199	6.75427e-06	0.00111449	-2.20055	14.9623	KYNU;ASS1;KMO;PIPOX;GCH1;AFMID;MTHFS;MTHFR;P4HA2;PLOD1;P4HA1;GPX4;GSTK1;VNN1;ALDH4A1;IDH1;DDAH1;DPEP1;GHR;NOX4;AADAT;GSTA1;CHDH;SHMT1;NAT8;GSTA2;BHMT2;GATM;SOD1;IYD;HAGH;ALDH7A1;FOLH1;PANK1;BHMT;FOXE1;DIO1;PCYOX1;SLC25A16;CBS;MGST2
aromatic amino acid family metabolic process (GO:0009072)	13/28	1.6065e-05	0.00223801	-2.44999	14.9502	AADAT;KYNU;PCBD1;ACMSD;QDPR;HGD;KMO;PAH;FAH;AFMID;ATP7A;HAAO;HPD
kidney development (GO:0001822)	30/122	6.39816e-06	0.00111449	-2.17218	14.7694	IRX3;FGF8;GPR162;ASS1;FSTL3;MME;DCN;GLI3;WT1;HOXD11;TCF21;WDPCP;REN;STRA6;PCSK5;C1GALT1;TGFBR1;SLC34A1;SLIT2;INVS;SULF2;SERPINF1;ITGA8;VEGFA;SULF1;PYGO1;HAS2;CA2;CUX1;CTSH
cholesterol homeostasis (GO:0042632)	20/61	7.09545e-06	0.00111449	-2.0833	14.1651	HPN;LDLR;SLC37A4;EPHX2;MYLIP;ABCA1;ABCG1;MTTP;ACSM3;MIA2;G6PC;NPC2;APOE;APOC3;PLA2G12B;LIPG;FABP3;ANGPTL3;APOM;LRP5
sterol homeostasis (GO:0055092)	20/62	8.66173e-06	0.0013136	-2.08493	13.8335	HPN;LDLR;SLC37A4;EPHX2;MYLIP;ABCA1;ABCG1;MTTP;ACSM3;MIA2;G6PC;NPC2;APOE;APOC3;PLA2G12B;LIPG;FABP3;ANGPTL3;APOM;LRP5
response to inorganic substance (GO:0010035)	61/370	2.49794e-05	0.00332907	-2.41075	13.7535	CRHBP;EZH2;FSTL3;MAP3K5;PTGES;HMOX1;GPX4;GPX3;CAT;DPEP1;FANCC;NET1;GATM;ACO1;QDPR;SLC34A1;FBP1;CYP2E1;PKLR;PDGFRB;ABAT;MAPK8;CA2;PRNP;SLC40A1;CASQ2;ASS1;KCNMB1;ALB;MT1E;HAAO;SFTPC;NDRG1;MT1B;MT1H;HBB;NFATC3;MT1G;MT1F;MT1L;IL6;OLR1;MAOB;GGH;HBA1;SPARC;PARK2;SOD1;ITPR3;MT1X;PXDNL;MTTP;ATP7A;SLC25A13;NEDD4;MT2A;FABP1;OGG1;CD14;HDAC6;CALM1
lipid homeostasis (GO:0055088)	25/96	1.62838e-05	0.00223801	-2.1514	13.1282	ACOX1;LDLR;SLC37A4;ABCA1;MYLIP;MIA2;APOE;COL4A3BP;APOC3;PLA2G12B;ANGPTL3;APOM;HPN;ACSM2A;MLXIPL;EPHX2;ABCG1;MTTP;ACSM3;G6PC;NPC2;HNF4A;FABP3;LIPG;LRP5
vitamin metabolic process (GO:0006766)	29/122	1.56932e-05	0.00223801	-2.11512	12.9068	MOCOS;CYP24A1;ENPP1;BTD;LGMN;NFS1;ACP5;MTHFR;GPHN;SLC23A1;AKR1A1;RGN;VNN1;PNPO;PLTP;MOCS1;SHMT1;CUBN;RXRA;CYB5A;TCN2;CYP27A1;PANK1;QPRT;CYP4F2;LRP2;SLC25A16;PSAT1;PC
response to transition metal nanoparticle (GO:1990267)	26/106	2.68956e-05	0.00347903	-2.22405	12.5904	ARSB;ASS1;ANK2;ALB;HMOX1;MT1E;HAAO;MT1B;MT1H;MT1G;MT1F;MT1L;GATM;ACO1;SLC34A1;GGH;PARK2;SOD1;MT1X;ATP7A;CYP17A1;MT2A;ABAT;CA2;PRNP;SLC40A1
amino-acid betaine metabolic process (GO:0006577)	10/17	3.37561e-05	0.0042417	-2.28419	12.478	CHDH;SHMT1;ALDH7A1;BHMT2;ACADM;BHMT;SLC22A4;DMGDH;CRAT;BBOX1
serine family amino acid catabolic process (GO:0009071)	9/14	5.0569e-05	0.00601088	-2.32646	11.8979	SHMT1;DMGDH;GCSH;THNSL2;DAO;CDO1;SARDH;GLDC;CBS
NAD metabolic process (GO:0019674)	12/29	8.21895e-05	0.00881633	-2.43037	11.4984	GPD1L;GPD1;ASPDH;KYNU;ALDOB;HAAO;QPRT;KMO;PCK2;OGDH;AFMID;MDH1
response to metal ion (GO:0010038)	45/255	7.15933e-05	0.0079023	-2.35369	11.3933	ASS1;CRHBP;FSTL3;KCNMB1;PTGES;ALB;HMOX1;MT1E;HAAO;NDRG1;MT1B;MT1H;NFATC3;MT1G;DPEP1;MT1F;MT1L;IL6;GATM;ACO1;MAOB;FBP1;SLC34A1;GGH;QDPR;PARK2;SPARC;ITPR3;SOD1;MT1X;MTTP;ATP7A;SLC25A13;NEDD4;MT2A;PKLR;ABAT;MAPK8;CA2;PRNP;OGG1;SLC40A1;CD14;CASQ2;CALM1
monocarboxylic acid catabolic process (GO:0072329)	22/82	3.52041e-05	0.00430077	-2.07451	11.3039	ACOX2;ECI2;HACL1;ACOX1;ACADM;EHHADH;PEX5;ECHS1;CRAT;PHYH;IDNK;AKR1A1;ABAT;ALDH4A1;CYP4F3;AGXT2;BDH2;CYP4F2;HADH;ACAD11;SCP2;SLC27A2
cation homeostasis (GO:0055080)	70/465	8.56511e-05	0.0089689	-2.31757	10.925	MTSS1;ATOX1;SLC7A8;CALB1;CUL5;ANK2;APOE;HMOX1;DLG4;TRPV4;RGN;SCN7A;MYC;ATP6V0D2;FGF2;GPR89A;FTL;ACO1;TRPM7;GRM1;ATP6V1D;SLC26A4;ATP6V1C2;PLCE1;SLC26A6;RHCG;FBXL5;COMMD1;CA2;ATP6V1G3;STEAP2;PRNP;SLC40A1;CCR1;C5;PTH1R;SLC37A4;SFXN4;SFXN1;SFXN2;NEO1;ATP6V1B2;CCL28;FTH1;SFXN5;VDR;SLC30A4;BDH2;SLC30A8;SLC31A1;CNNM2;MICU1;PDK2;SLC8A1;KL;EPHX2;PARK2;ITPR3;SOD1;S100A14;TMPRSS3;KDR;LCN2;ATP7A;TFRC;MT2A;PL…
iron ion homeostasis (GO:0055072)	23/92	5.99362e-05	0.00693683	-2.18327	10.8529	ACO1;SFXN4;SFXN1;SFXN2;NEO1;ATP6V1B2;SOD1;ATP6V1D;FTH1;SFXN5;LCN2;ATP6V1C2;TFRC;HMOX1;FBXL5;ATP6V0A1;BDH2;ATP6V1G3;STEAP2;MYC;SLC40A1;ATP6V0D2;FTL
alcohol metabolic process (GO:0006066)	55/340	9.612e-05	0.00983106	-2.2432	10.3686	CYP24A1;LDLR;LGMN;DAK;SYNJ1;TTR;AGPAT6;APOE;SMPDL3A;MIOX;CAT;FGF2;IP6K2;MINPP1;ACAA2;RXRA;PCTP;SLC34A1;ALDH3B2;LPIN2;CHPT1;DHRS3;ALDH7A1;PLCE1;NPC2;CYP27A1;ALDH1B1;DEGS2;ENPP6;ACHE;SORD;ADH5;ADH6;ABCA1;ALDH3A2;ALDH1A3;OSBPL1A;APOC3;DMGDH;PCYT1B;ANGPTL3;INPP5B;CHDH;CUBN;ABCG1;PCK1;CYP17A1;PLCG2;ALDH2;GK3P;LRP2;SCP2;LRP5;RETSAT;CALM1
xenobiotic metabolic process (GO:0006805)	32/156	7.18717e-05	0.0079023	-2.13487	10.334	CYP3A5;CYP24A1;CYP2B6;UGDH;ADH6;RORC;SULT2B1;PTGIS;SLC35D1;FMO1;FMO2;SMOX;SULT1C2;GSTA1;GSTA2;CYP2C8;NAT2;MAOB;EPHX2;CYP2E1;TPMT;CYP17A1;GLYAT;HNF4A;CYP27A1;AS3MT;ALDH2;CYP4F3;CYP4F2;UGP2;MGST2;NNMT
metal ion homeostasis (GO:0055065)	64/422	0.000141498	0.013086	-2.31793	10.0511	MTSS1;ATOX1;SLC7A8;CALB1;CUL5;ANK2;APOE;HMOX1;DLG4;TRPV4;RGN;SCN7A;ATP6V0D2;FGF2;MYC;FTL;ACO1;TRPM7;GRM1;ATP6V1D;ATP6V1C2;PLCE1;FBXL5;COMMD1;ATP6V1G3;STEAP2;PRNP;SLC40A1;CCR1;C5;PTH1R;SLC37A4;SFXN4;SFXN1;SFXN2;NEO1;ATP6V1B2;CCL28;FTH1;SFXN5;VDR;SLC30A4;BDH2;SLC30A8;SLC31A1;CNNM2;MICU1;SLC8A1;KL;EPHX2;PARK2;ITPR3;SOD1;S100A14;TMPRSS3;KDR;LCN2;ATP7A;TFRC;MT2A;PLCG2;ATP6V0A1;CYP4F2;F2R
response to nutrient levels (GO:0031667)	48/291	0.000175343	0.0154232	-2.33409	9.73757	ARSB;ALPL;CYP24A1;KYNU;FOXA2;ASS1;CPEB4;SLC37A4;ABCA1;PSPH;CCL28;ACAT1;ATG2B;VDR;IGF1R;DNAJC15;SLC16A1;MTHFR;ALB;APOE;HMOX1;ATG7;APOC3;SFTPC;SLC39A5;CAT;TNRC6A;NR1H4;HMGCL;GHR;WDFY3;PDK2;ADSSL1;IL6;ACADM;GATM;SLC34A1;RRP8;SPARC;SOD1;SLC6A19;CYP17A1;TULP4;SSTR1;PKLR;LIPG;OGG1;HDAC6
nicotinamide nucleotide metabolic process (GO:0046496)	16/53	0.0001288	0.0123144	-2.20352	9.68885	GPD1;ASPDH;KYNU;ALDOB;KMO;PCK2;OGDH;AFMID;GPD1L;FMO1;FMO2;HAAO;IDH1;QPRT;DCXR;MDH1
fatty acid metabolic process (GO:0006631)	47/280	0.000142821	0.013086	-2.23066	9.67262	ACOX2;PPARA;HACL1;ACOX1;EHHADH;ECHDC2;PEX5;ECHS1;ACSF2;CRYL1;AGPAT6;PTGIS;PTGES;GPX4;ELOVL2;PTPLA;MGLL;BDH2;LIAS;HADH;ANGPTL3;DPEP1;GHR;ECI2;ACAA2;ACADM;CYP2C8;ACSM2A;EPHX2;CBR4;CYP4V2;CRAT;LPIN2;PHYH;ACSM3;HAO2;FABP3;CYP4F3;THNSL2;CYP4F2;ACAD11;THEM4;HPGD;SLC27A2;SCP2;ACSM5;MGST2
pyridine nucleotide metabolic process (GO:0019362)	16/53	0.0001288	0.0123144	-2.19912	9.66951	GPD1;ASPDH;KYNU;ALDOB;KMO;PCK2;OGDH;AFMID;GPD1L;FMO1;FMO2;HAAO;IDH1;QPRT;DCXR;MDH1
water-soluble vitamin metabolic process (GO:0006767)	22/90	0.00011373	0.0113678	-2.03686	9.11898	MOCOS;SHMT1;CUBN;BTD;ENPP1;NFS1;ACP5;CYB5A;TCN2;SLC23A1;GPHN;MTHFR;AKR1A1;PANK1;PNPO;RGN;VNN1;QPRT;PSAT1;SLC25A16;PC;MOCS1
cellular amino acid biosynthetic process (GO:0008652)	24/106	0.000156485	0.0140453	-2.07608	8.85546	CHDH;SHMT1;BHMT2;ASS1;GATM;GLUD1;UPB1;PAH;CDO1;PSPH;GCH1;HAGH;ADI1;ALDH7A1;MTHFR;PLOD1;GLS;BHMT;ALDH4A1;AGXT2;PSAT1;GPT2;CBS;MGST2
response to nutrient (GO:0007584)	31/163	0.000299315	0.0239343	-2.14899	8.02099	ARSB;ALPL;CYP24A1;KYNU;FOXA2;ASS1;SLC37A4;ABCA1;CCL28;VDR;IGF1R;SLC16A1;MTHFR;ALB;HMOX1;APOC3;SFTPC;CAT;HMGCL;NR1H4;PDK2;GATM;SLC34A1;RRP8;SPARC;SLC6A19;TULP4;SSTR1;PKLR;LIPG;OGG1
response to extracellular stimulus (GO:0009991)	49/313	0.000440088	0.0307223	-2.29676	7.99909	ARSB;CYP24A1;KYNU;FOXA2;CPEB4;PSPH;ATG2B;SLC16A1;DNAJC15;APOE;ATG7;HMOX1;CAT;HMGCL;GHR;ACADM;GATM;SLC34A1;RRP8;SSTR1;PKLR;ALPL;ASS1;SLC37A4;ABCA1;CCL28;ACAT1;IGF1R;VDR;MTHFR;ALB;APOC3;SFTPC;SLC39A5;TNRC6A;NR1H4;WDFY3;PDK2;IL6;ADSSL1;SPARC;SOD1;SLC6A19;TULP4;CYP17A1;ITGA6;LIPG;OGG1;HDAC6
cellular response to zinc ion (GO:0071294)	8/14	0.000243424	0.0209918	-2.0443	7.89842	MT1L;MT2A;MT1E;MT1B;MT1H;MT1X;MT1G;MT1F
sulfur amino acid metabolic process (GO:0000096)	14/45	0.000258777	0.0218866	-2.0575	7.8635	TST;ADI1;NOX4;SUOX;MSRA;BHMT2;MTHFR;SLC25A10;BHMT;NFS1;PCYOX1;CDO1;DPEP1;CBS
monosaccharide metabolic process (GO:0005996)	38/221	0.000396484	0.0285858	-2.18128	7.7541	GAL3ST3;SORD;FUT6;PFKFB2;ALDOB;SLC37A4;PHKA1;UGDH;SHPK;GALK2;SLC23A1;GALM;AKR1A1;APOD;SLC35D1;RGN;GPD1;PDK2;FBP1;CYB5A;RBKS;PCK2;FUCA2;PCK1;KHK;G6PC;SLC25A13;SLC25A10;PKLR;UGT2B7;UGP2;DCXR;PC;LRP5;CALM1;IGFBP5;MDH1;XYLB
response to zinc ion (GO:0010043)	13/41	0.00036594	0.0268234	-2.13992	7.74324	ATP7A;MT1L;ASS1;MT2A;MT1E;HAAO;GGH;MT1B;CA2;MT1H;MT1X;MT1G;MT1F
aspartate family amino acid catabolic process (GO:0009068)	8/15	0.000346281	0.0258126	-2.10745	7.70673	AADAT;ALDH7A1;ASPA;GCAT;AASS;OGDH;DDO;PIPOX
indole-containing compound metabolic process (GO:0042430)	10/26	0.000510357	0.0325297	-2.24854	7.70259	RNF180;ATP7A;AADAT;DDC;KYNU;HAAO;SLC34A1;ACMSD;KMO;AFMID
monocarboxylic acid transport (GO:0015718)	23/104	0.000284884	0.02364	-2.04314	7.65117	PPARA;SLC22A13;SLC6A13;SLC10A5;SLC10A2;SLC9A3R1;SLCO2B1;SLC16A2;SLC16A5;SLC26A6;SLC16A1;SLCO1A2;SLC16A4;PLIN2;APOE;ALB;SLC22A4;FABP3;FABP1;ABCC2;SLC22A5;SLC27A2;PDZK1
response to cadmium ion (GO:0046686)	12/36	0.000421177	0.0298764	-2.17799	7.64625	HMOX1;MT1E;HAAO;SLC34A1;MAPK8;SPARC;OGG1;PRNP;MT1H;MT1X;MT1G;MT1F
response to oxidative stress (GO:0006979)	46/290	0.000506503	0.0325297	-2.22144	7.60978	ALS2;FGF8;ATOX1;EZH2;MSRA;MAP3K5;APOD;APOE;HMOX1;GPX4;GPX3;SFTPC;IDH1;VNN1;LIAS;SEPP1;CAT;PLA2R1;HBB;RBM11;DPEP1;NET1;FANCC;PDK2;SLC8A1;IL6;EPAS1;GATM;OLR1;HBA1;PARK2;CYP2E1;SOD1;MSRB2;PXDNL;ATP7A;UACA;PDGFRB;MAPK8;FABP1;ABCC2;SCARA3;PRNP;OGG1;TP53INP1;HDAC6
oxidoreduction coenzyme metabolic process (GO:0006733)	17/65	0.000340164	0.0257938	-2.07979	7.60708	GPD1;ASPDH;KYNU;ALDOB;KMO;PCK2;OGDH;PDSS1;AFMID;GPD1L;FMO1;FMO2;HAAO;IDH1;QPRT;DCXR;MDH1
response to steroid hormone (GO:0048545)	55/369	0.000587307	0.0349051	-2.26727	7.60697	ARSB;PPARA;PDGFB;CRHBP;RORC;PSPH;GLI3;HEY1;PAPPA;HMOX1;GPX4;LOX;HTR5A;GHR;AR;RARG;RXRA;SLC34A1;HNF4G;CDO1;SLIT2;SLIT3;SERPINF1;HNF4A;SSTR1;SLC25A36;MGEA5;PDGFRB;CA2;ACVR1;ALPL;ASS1;PAQR7;NR3C1;MDK;UGT3A2;VDR;ZNF703;HNMT;NR1D1;IDH1;SFTPC;BCAS3;NR1H4;IL6;MAOB;CRIPAK;SPARC;TPMT;PCK2;CYP17A1;WNT7B;ABCC2;OGG1;CALM1
amine catabolic process (GO:0009310)	8/16	0.000481932	0.0323687	-2.19524	7.53091	AADAT;KYNU;SAT2;HAAO;ACMSD;SMOX;KMO;AFMID
anion transmembrane transport (GO:0098656)	32/172	0.00033894	0.0257938	-2.04478	7.47903	SLC38A5;SLC36A1;SLC36A2;ANO1;SLC7A8;SLC7A9;SLC7A7;SLC16A1;SLC22A4;SLC22A5;SLC4A1;ANO6;SLC43A2;ANO10;SLC12A6;SLC12A7;GLRB;SLC12A3;SLC34A1;SLC3A1;ANKH;SLC26A4;SLC6A9;SLC26A6;SLC17A3;RHCG;SLC26A7;SLC7A2;CLIC5;SLC17A1;SLC13A1;PCYOX1
lipid modification (GO:0030258)	27/134	0.000327097	0.0256888	-2.04085	7.473	ACOX2;ACOX1;HACL1;EHHADH;SYNJ1;PIP5K1B;PEX5;ECHS1;PIKFYVE;B4GALNT2;BDH2;CERK;HADH;INPP5B;PIK3R1;IP6K2;ACADM;PI4KA;EPHX2;CYP4V2;CRAT;PHYH;HAO2;PIP4K2A;ACAD11;SLC27A2;SCP2
cellular biogenic amine catabolic process (GO:0042402)	8/16	0.000481932	0.0323687	-2.17796	7.47165	AADAT;KYNU;SAT2;HAAO;ACMSD;SMOX;KMO;AFMID
blood vessel morphogenesis (GO:0048514)	18/74	0.000485751	0.0323687	-2.11002	7.23855	FGF8;FLT1;PDGFB;TGFBR1;CDH2;HOXA1;HEY1;APOE;NEDD4;DLL4;VEGFA;PDGFRB;HEG1;STRA6;FOXC1;ANGPTL3;HPGD;LRP5
fatty acid catabolic process (GO:0009062)	17/64	0.000291813	0.0237666	-1.91216	7.15047	ACOX2;ECI2;HACL1;ACOX1;ACADM;EHHADH;PEX5;ECHS1;CRAT;PHYH;CYP4F3;BDH2;CYP4F2;HADH;ACAD11;SCP2;SLC27A2
anion homeostasis (GO:0055081)	12/38	0.000628735	0.036869	-2.12858	7.02513	ENPP1;HNF4A;APOE;LIPG;SLC34A1;MLXIPL;FABP3;ABCC2;ABCA1;ANGPTL3;SLC9A3R1;ABCG1
cellular transition metal ion homeostasis (GO:0046916)	20/89	0.000581458	0.0349051	-2.02876	6.80674	ACO1;ATOX1;ATP6V1B2;SOD1;ATP6V1D;FTH1;ATP7A;ATP6V1C2;TFRC;HMOX1;MT2A;ATP6V0A1;ATP6V1G3;SLC30A8;PRNP;MYC;SLC40A1;ATP6V0D2;SLC31A1;FTL
cellular response to reactive oxygen species (GO:0034614)	20/89	0.000581458	0.0349051	-2.0241	6.79111	PDK2;SLC8A1;IL6;EZH2;HBA1;SOD1;PXDNL;ATP7A;MAP3K5;GPX4;GPX3;SFTPC;MAPK8;FABP1;CAT;HBB;DPEP1;NET1;HDAC6;FANCC
cellular lipid catabolic process (GO:0044242)	26/131	0.000510272	0.0325297	-1.98037	6.78397	ACOX2;ACOX1;HACL1;GM2A;EHHADH;ECHS1;PEX5;SMPDL3A;APOC3;MGLL;BDH2;ANGPTL3;HADH;ECI2;ACADM;CRAT;PHYH;PNPLA3;PLCG2;LIPG;CYP4F3;CYP4F2;ACAD11;SLC27A2;SCP2;NEU4
sodium ion transport (GO:0006814)	27/141	0.000651042	0.0376748	-2.04653	6.71011	SLC5A2;SLC38A3;SLC38A6;KLHL3;SLC23A1;SCN9A;SLC22A4;SCN7A;SLC22A5;SLC4A4;SLC8A1;SLC12A3;ASIC2;SLC3A2;SLC34A1;SLC10A5;SLC10A2;SLC9A3R1;SLC17A3;SLC17A1;SLC13A1;SLC5A9;SLC13A2;SLC13A3;SLC5A10;TRAPPC10;SLC5A12
steroid metabolic process (GO:0008202)	39/240	0.000877475	0.04508	-2.09831	6.50334	ACOX2;HSD17B11;CYP3A5;CYP24A1;LDLR;CYP2B6;HSD17B14;LGMN;SLC37A4;SULT2B1;ABCA1;NR3C1;SLCO1A2;SERPINA6;ALB;APOE;OSBPL1A;APOC3;CAT;ANGPTL3;NR1H4;ACAA2;CUBN;RXRA;PCTP;CYP2E1;SLC10A2;ABCG1;CYP17A1;G6PC;NPC2;PRLR;CYP27A1;PBX1;LRP2;SLC27A2;SCP2;UGT2B7;LRP5
protein tetramerization (GO:0051262)	20/89	0.000581458	0.0349051	-1.93586	6.49504	SHMT1;ACHE;PCBD1;RXRA;FBP1;DPYS;AASS;PEX5;CBR4;KCNJ12;PDSS1;IGF1R;RRM2;GLS;GPX3;ACOT13;TGM3;CAT;DCXR;HMGCL
drug metabolic process (GO:0017144)	11/35	0.00108301	0.0516604	-2.17732	6.45155	FMO4;CYP3A5;CYP2B6;FMO1;CYP2C8;FMO2;EPHX2;CYP4F2;CYP2E1;DPEP1;PCK1
carbohydrate catabolic process (GO:0016052)	24/120	0.000749585	0.0428139	-2.04546	6.44502	SORD;GM2A;ADPGK;FUT6;PFKFB2;OGDHL;ALDOB;PHKA1;RBKS;OGDH;IDNK;KHK;G6PC;AKR1A1;MIOX;PKLR;MGAM;GK3P;DHTKD1;ENOSF1;LRP5;CALM1;NEU4;XYLB
lipid catabolic process (GO:0016042)	38/232	0.000892045	0.0450944	-2.07322	6.42489	ACOX2;HSD17B11;HACL1;ACOX1;CYP24A1;ENPP6;PLCXD3;GM2A;HSD17B14;EHHADH;PEX5;ECHS1;PLCL2;APOE;SMPDL3A;APOC3;PLA2G12B;PLCD4;MGLL;BDH2;HADH;ANGPTL3;ECI2;PLD1;ACADM;CRAT;PNPLA4;PNPLA3;PHYH;PLCE1;PLCG2;LIPG;CYP4F3;CYP4F2;ACAD11;SLC27A2;SCP2;NEU4
branched-chain amino acid metabolic process (GO:0009081)	9/23	0.000877048	0.04508	-2.05872	6.38061	ALDH6A1;IVD;DAO;ACAD8;HIBCH;ACAT1;HMGCL;GHR;AUH
regulation of lipid metabolic process (GO:0019216)	39/245	0.00123155	0.0563263	-2.18785	6.29355	PPARA;PDGFB;FOXA2;LDLR;RORC;PDE3B;KIT;NR3C1;VDR;IGF1R;DNAJC15;APOD;NR1D1;APOE;APOC3;C1QTNF2;FGF1;ANGPTL3;FGF2;THRSP;PIK3R1;NR1H4;PDK2;FLT1;EPHX2;MLXIPL;SMEK2;SOD1;SNAI2;ABCG1;ANKRD26;CYP17A1;NPC2;HNF4A;FABP3;PDGFRB;FABP1;SCP2;GPR116
indolalkylamine metabolic process (GO:0006586)	8/18	0.000881511	0.04508	-1.98273	6.14509	ATP7A;AADAT;DDC;KYNU;HAAO;ACMSD;KMO;AFMID
morphogenesis of an epithelium (GO:0002009)	45/296	0.00125511	0.0563263	-2.10966	6.06863	MTSS1;FGF8;PDGFB;FOXA2;NR3C1;SOX9;KLHL3;GLI3;WT1;HOXD11;SEMA5A;VDR;TCF21;IGF1R;RSPO3;ALDH1A3;SOX17;MYC;NFATC3;FGF2;ETV4;IL6;RARG;FLT1;PHACTR4;SOCS3;MPP5;RASIP1;PCDH15;TEAD2;FZD5;FRZB;EPHA2;SLIT2;KDR;MIB1;FREM2;DLL4;VEGFA;PBX1;CA2;TFAP2C;CTSH;LRP5;ACVR1
tissue morphogenesis (GO:0048729)	52/358	0.00135897	0.059176	-2.1216	5.99826	MTSS1;FGF8;FOXA2;PDGFB;KLHL3;GLI3;HOXD11;HEY1;RSPO3;SOX17;FGF2;MYC;RARG;SOCS3;RXRA;RASIP1;MPP5;SLIT2;MIB1;DLL4;VEGFA;FOXC1;CA2;TFAP2C;CTSH;ACVR1;MYL3;NR3C1;SOX9;WT1;SEMA5A;IGF1R;TCF21;VDR;ALDH1A3;NFATC3;ETV4;IL6;FLT1;PHACTR4;TEAD2;PCDH15;FRZB;FZD5;SNAI2;EPHA2;KDR;WNT7B;FREM2;TGFBR3;PBX1;LRP5
acylglycerol metabolic process (GO:0006639)	20/93	0.000933311	0.0466444	-1.94284	5.95521	GPD1;SLC37A4;CYP2E1;LPIN2;PNPLA3;MTTP;GPD1L;PLCE1;G6PC;AGPAT6;APOE;ELOVL2;AGPAT9;APOC3;SLC22A4;APOH;LCLAT1;MGLL;CAT;AGPAT3
protein oligomerization (GO:0051259)	53/366	0.00130418	0.0575871	-2.08503	5.95163	ALAD;ATL2;PEX5;KCNJ12;HMOX1;GPX3;ACOT13;SLC22A6;CAT;HMGCL;IRAK1;AR;MAGI2;CRYAA;PCBD1;RXRA;SLC34A1;FBP1;CBR4;TRMT61B;ST13;RRM2;PRNP;HACL1;ACHE;CAMK2G;AASS;DPYS;PDSS1;ACAT1;GCH1;C1QTNF7;ANXA6;IGF1R;C1QTNF2;TGM3;SFTPC;SKIL;HBB;EHD3;MICU1;SHMT1;GLRB;HBA1;ITPR3;BIRC2;KCNV1;KCTD6;P2RX1;GLS;P2RX3;QPRT;DCXR
glycine metabolic process (GO:0006544)	8/18	0.000881511	0.04508	-1.91478	5.93452	SHMT1;GLYAT;GCAT;DMGDH;GCSH;AGXT2;SARDH;GLDC
response to reactive oxygen species (GO:0000302)	26/141	0.00130939	0.0575871	-2.03996	5.82299	EZH2;MAP3K5;APOD;APOE;HMOX1;GPX4;GPX3;SFTPC;CAT;HBB;DPEP1;FANCC;NET1;PDK2;IL6;SLC8A1;OLR1;HBA1;CYP2E1;SOD1;PXDNL;ATP7A;PDGFRB;FABP1;MAPK8;HDAC6
neutral lipid metabolic process (GO:0006638)	20/94	0.00104556	0.0516604	-1.95063	5.77984	GPD1;SLC37A4;CYP2E1;LPIN2;PNPLA3;MTTP;GPD1L;PLCE1;G6PC;AGPAT6;APOE;ELOVL2;AGPAT9;APOC3;SLC22A4;APOH;LCLAT1;MGLL;CAT;AGPAT3
fatty acid oxidation (GO:0019395)	16/64	0.00076305	0.0430243	-1.83469	5.77192	ACOX2;HACL1;ACOX1;ACADM;EHHADH;PEX5;ECHS1;CYP4V2;CRAT;PHYH;HAO2;BDH2;HADH;ACAD11;SCP2;SLC27A2
triglyceride metabolic process (GO:0006641)	19/87	0.00105855	0.0516604	-1.93921	5.74601	GPD1;SLC37A4;CYP2E1;LPIN2;PNPLA3;MTTP;GPD1L;G6PC;AGPAT6;APOE;ELOVL2;AGPAT9;APOC3;SLC22A4;APOH;LCLAT1;MGLL;CAT;AGPAT3
lipid oxidation (GO:0034440)	16/65	0.000879046	0.04508	-1.82432	5.65415	ACOX2;HACL1;ACOX1;ACADM;EHHADH;PEX5;ECHS1;CYP4V2;CRAT;PHYH;HAO2;BDH2;HADH;ACAD11;SCP2;SLC27A2
tryptophan metabolic process (GO:0006568)	7/13	0.000783935	0.0436423	-1.70071	5.32616	ATP7A;AADAT;KYNU;HAAO;ACMSD;KMO;AFMID
cellular amide metabolic process (GO:0043603)	30/177	0.00187523	0.0736363	-2.0011	5.22011	ASS1;BTD;NIT2;MME;ANPEP;ENPEP;TPP1;SMPDL3A;REN;GSTK1;GPX4;IDH1;VNN1;BDH2;PCSK5;DPEP1;GHR;GSTA1;NAT8B;NAT8;GSTA2;SOD1;HAGH;AMDHD1;PANK1;ACE2;SLC25A16;CTSH;PC;MGST2
single-organism carbohydrate catabolic process (GO:0044724)	22/113	0.00164618	0.0696145	-1.95801	5.21767	SORD;GM2A;ADPGK;FUT6;PFKFB2;OGDHL;ALDOB;PHKA1;RBKS;OGDH;IDNK;KHK;G6PC;AKR1A1;MIOX;PKLR;GK3P;DHTKD1;LRP5;CALM1;NEU4;XYLB
regulation of carbohydrate metabolic process (GO:0006109)	26/145	0.0018506	0.073324	-1.99127	5.20292	PPARA;FOXA2;ENPP1;PDGFB;PFKFB2;PTH1R;RORC;NR3C1;NR1D1;SLC35B4;C1QTNF2;ENTPD5;NR1H4;PDK2;GPD1;IL6;ACADM;MLXIPL;SMEK2;FBP1;PARK2;KHK;GRB10;MGEA5;IGFBP4;IGFBP5
coenzyme biosynthetic process (GO:0009108)	20/98	0.00161763	0.0690713	-1.92401	5.14214	MOCOS;ASPDH;KYNU;PCBD1;NFS1;QDPR;KMO;PDSS1;GCH1;AFMID;GPHN;PANK1;ELOVL2;HAAO;PNPO;LIAS;QPRT;CYP4F2;SLC25A16;MOCS1
alpha-amino acid biosynthetic process (GO:1901607)	16/69	0.00150433	0.0648631	-1.86125	5.0914	SHMT1;BHMT2;ASS1;GATM;GLUD1;PSPH;GCH1;ADI1;MTHFR;PLOD1;GLS;BHMT;ALDH4A1;AGXT2;PSAT1;CBS
morphogenesis of a branching epithelium (GO:0061138)	28/162	0.00203587	0.0778587	-1.96762	5.02305	FGF8;FOXA2;PDGFB;SOX9;GLI3;WT1;HOXD11;SEMA5A;VDR;TCF21;RSPO3;NFATC3;FGF2;MYC;ETV4;IL6;FLT1;SOCS3;RASIP1;FZD5;EPHA2;SLIT2;KDR;DLL4;VEGFA;PBX1;LRP5;ACVR1
lipoprotein metabolic process (GO:0042157)	12/44	0.00182065	0.072793	-1.89081	4.95419	PPARA;CUBN;LDLR;OLR1;APOE;ALB;APOC3;ABCA1;LYPLAL1;APOM;ABCG1;MTTP
regulation of vasculature development (GO:1901342)	32/197	0.00244809	0.0885637	-2.01479	4.88391	PDGFB;TNFRSF12A;CYSLTR2;C5;PDE3B;WT1;SEMA5A;PTGIS;HEY1;LRG1;HMOX1;SERPINE1;APOH;BAI3;FGF1;ANGPTL3;DDAH1;FGF2;ANGPT2;IL6;FLT1;KLK3;CHI3L1;SPARC;EPHA2;KDR;SERPINF1;DLL4;VEGFA;SERPINB7;SULF1;CTSH
cellular response to oxidative stress (GO:0034599)	26/148	0.00237313	0.0877061	-1.99342	4.85151	PDK2;SLC8A1;IL6;EPAS1;EZH2;HBA1;SOD1;PXDNL;ATP7A;MAP3K5;UACA;HMOX1;GPX4;GPX3;SFTPC;MAPK8;FABP1;CAT;PLA2R1;HBB;RBM11;DPEP1;TP53INP1;NET1;FANCC;HDAC6
artery morphogenesis (GO:0048844)	12/46	0.0024933	0.0885637	-1.96591	4.76543	HOXA1;FGF8;HEY1;APOE;TGFBR1;DLL4;VEGFA;PDGFRB;FOXC1;STRA6;ANGPTL3;HPGD
tricarboxylic acid metabolic process (GO:0072350)	7/14	0.00109241	0.0516604	-1.60516	4.75619	ACO2;ASS1;ACO1;GLUD1;SLC34A1;IDH1;GHR
regulation of glucose metabolic process (GO:0010906)	19/94	0.00229693	0.0856094	-1.91764	4.71348	PPARA;PDK2;IL6;ACADM;FOXA2;ENPP1;PFKFB2;FBP1;SMEK2;RORC;PARK2;NR3C1;KHK;GRB10;NR1D1;C1QTNF2;SLC35B4;IGFBP4;IGFBP5
cellular carbohydrate metabolic process (GO:0044262)	28/165	0.00256865	0.0903754	-1.94378	4.67242	GAL3ST3;SORD;PFKFB2;DAK;SLC37A4;PHKA1;SYNJ1;GALK2;GNPTAB;NR1D1;MIOX;IDH1;ANGPTL3;ENOSF1;ACADM;RBKS;CERCAM;IDNK;PCK1;KHK;G6PC;MGAM;GK3P;HAS2;UGP2;MDH1;XYLB;CALM1
transition metal ion transport (GO:0000041)	20/101	0.00220445	0.0828647	-1.8719	4.66206	SLC39A11;ATOX1;SFXN1;ATP6V1B2;TCN2;ATP6V1D;FTH1;ATP7A;ATP6V1C2;TFRC;SLC30A4;ATP6V0A1;ATP6V1G3;SLC39A5;SLC30A8;STEAP2;SLC40A1;ATP6V0D2;SLC31A1;FTL
negative regulation of cell migration (GO:0030336)	28/166	0.00277082	0.0952038	-1.96696	4.62578	PDGFB;AIF1;ABHD6;C5;CCL28;PBLD;APOD;APOE;HMOX1;SERPINE1;APOH;FGF2;ANGPT2;DPEP1;MAGI2;OSBPL8;DACH1;SLC9A3R1;SLIT2;THY1;DLL4;SULF1;GPR56;TGFBR3;TP53INP1;ADAM15;IGFBP5;SRGAP2
negative regulation of cellular component movement (GO:0051271)	30/183	0.00291367	0.0982243	-1.97732	4.58837	PDGFB;AIF1;ABHD6;C5;CCL28;PBLD;SEMA5A;APOD;APOE;HMOX1;SERPINE1;APOH;FGF2;ANGPT2;DPEP1;MAGI2;OSBPL8;DACH1;SLC9A3R1;PTPRO;SLIT2;THY1;DLL4;SULF1;GPR56;TGFBR3;TP53INP1;ADAM15;IGFBP5;SRGAP2
glutamine family amino acid metabolic process (GO:0009064)	15/65	0.00217084	0.0823048	-1.80929	4.51838	AADAT;ADSSL1;ASS1;NIT2;GLUD1;GGH;AGMAT;FAH;AMDHD1;GLS;GFPT2;ALDH4A1;PRODH2;DAO;DDAH1
cellular response to cadmium ion (GO:0071276)	7/14	0.00109241	0.0516604	-1.51751	4.49649	HMOX1;MT1E;OGG1;MT1H;MT1X;MT1G;MT1F
organic hydroxy compound catabolic process (GO:1901616)	15/66	0.00246443	0.0885637	-1.84264	4.46663	CYP24A1;SORD;MAOB;SYNJ1;ADH5;PDXP;ALDH3B2;ALDH1B1;APOE;SMPDL3A;MIOX;ALDH2;GK3P;CYP4F3;CYP4F2
cofactor biosynthetic process (GO:0051188)	23/127	0.00294807	0.0982243	-1.90781	4.42708	MOCOS;ASPDH;KYNU;ALAD;PCBD1;NFS1;QDPR;KMO;PDSS1;GCH1;AFMID;GPHN;PANK1;ELOVL2;HAAO;SLC25A38;PNPO;QPRT;BDH2;LIAS;CYP4F2;SLC25A16;MOCS1
gland development (GO:0048732)	34/220	0.00370653	0.116876	-1.9963	4.28534	FGF8;ASS1;FSTL3;NR3C1;EPHB3;SOX9;MDK;ACAT1;WT1;IGF1R;TCF21;ATG7;LHX3;STRA6;HMGCL;FGF3;AR;RARG;ACADM;TGFBR1;QDPR;AK2;AK4;SIX4;SOD1;SLCO2B1;CYP17A1;FOXE1;PDGFRB;TGFBR3;FOXC1;PBX1;HOXB9;TFAP2C
inorganic anion transport (GO:0015698)	23/127	0.00294807	0.0982243	-1.81687	4.21605	SLC12A6;SLC12A7;GLRB;ENPP1;SLC12A3;ENPP3;ANO1;SLC34A1;ANKH;SLC26A4;SLC26A6;SLC17A3;RHCG;SLC26A7;CLIC5;SLC17A1;SLC13A1;SLC4A1;PCYOX1;CLCN6;ANO6;IP6K2;ANO10
neutral amino acid transport (GO:0015804)	9/28	0.00266957	0.092447	-1.76529	4.20336	SLC38A5;SLC36A1;SLC36A2;SLC38A3;SLC6A9;SLC3A2;SLC7A8;SLC7A9;SLC6A19
amino acid transport (GO:0006865)	23/128	0.00321207	0.106216	-1.86977	4.19255	SLC38A5;SLC36A1;SLC36A2;SLC38A3;SLC16A10;SLC38A6;SLC22A8;SLC6A13;SLC3A2;SLC7A8;SLC7A9;SLC3A1;SLC9A3R1;SLC6A19;SLC7A7;SLC6A9;SLC17A5;FOLR3;SLC25A13;SLC7A2;GLS;ABCC2;SLC43A2
negative regulation of cell motility (GO:2000146)	28/170	0.00372049	0.116876	-1.94697	4.17943	PDGFB;AIF1;ABHD6;C5;CCL28;PBLD;APOD;APOE;HMOX1;SERPINE1;APOH;FGF2;ANGPT2;DPEP1;MAGI2;OSBPL8;DACH1;SLC9A3R1;SLIT2;THY1;DLL4;SULF1;GPR56;TGFBR3;TP53INP1;ADAM15;IGFBP5;SRGAP2
regulation of cellular carbohydrate metabolic process (GO:0010675)	24/137	0.00352415	0.113133	-1.90929	4.1607	GPD1;PPARA;PDK2;IL6;ACADM;ENPP1;FOXA2;PFKFB2;PTH1R;FBP1;SMEK2;MLXIPL;RORC;PARK2;NR3C1;KHK;GRB10;NR1D1;C1QTNF2;SLC35B4;MGEA5;ENTPD5;IGFBP4;IGFBP5
2-oxoglutarate metabolic process (GO:0006103)	7/16	0.00198837	0.0767091	-1.61268	4.14093	AADAT;ADHFE1;L2HGDH;IDH1;OGDH;GPT2;GHR
morphogenesis of a branching structure (GO:0001763)	28/170	0.00372049	0.116876	-1.92606	4.13454	FGF8;FOXA2;PDGFB;SOX9;GLI3;WT1;HOXD11;SEMA5A;VDR;TCF21;RSPO3;NFATC3;FGF2;MYC;ETV4;IL6;FLT1;SOCS3;RASIP1;FZD5;EPHA2;SLIT2;KDR;DLL4;VEGFA;PBX1;LRP5;ACVR1
protein homooligomerization (GO:0051260)	35/230	0.00406445	0.122651	-1.92637	4.04233	ALAD;ATL2;DPYS;KCNJ12;ACAT1;GCH1;C1QTNF7;ANXA6;HMOX1;C1QTNF2;GPX3;SFTPC;ACOT13;SLC22A6;SKIL;CAT;EHD3;MICU1;SHMT1;CRYAA;PCBD1;RXRA;SLC34A1;FBP1;CBR4;ITPR3;TRMT61B;KCNV1;KCTD6;ST13;P2RX1;P2RX3;GLS;PRNP;DCXR
fatty acid beta-oxidation (GO:0006635)	12/47	0.00289851	0.0982243	-1.71484	3.97929	ACOX2;ACOX1;ACADM;EHHADH;ECHS1;PEX5;BDH2;CRAT;ACAD11;HADH;SLC27A2;SCP2
monovalent inorganic cation transport (GO:0015672)	52/384	0.0049444	0.13763	-1.98971	3.94597	SLC5A2;SLC36A1;KCNJ15;SLC36A2;KCNJ12;KCNK13;KLHL3;KCNK10;SLC23A1;KCNK5;SLC22A4;SCN7A;SLC22A5;SLC4A4;KCNQ2;ATP6V0D2;SLC12A6;SLC12A7;SLC3A2;SLC34A1;CYB5A;SLC9A3R1;ATP6V1D;CNGA1;ATP6V1C2;RHCG;KCNH6;ATP6V1G3;TRAPPC10;SLC38A3;SLC38A6;ATP6V1B2;SLC47A1;KCNMB1;SCN9A;HPN;SLC8A1;SLC12A3;ASIC2;SLC10A5;SLC10A2;KCNV1;SLC17A5;SLC17A3;SLC17A1;SLC13A1;SLC5A9;SLC13A2;ATP6V0A1;SLC13A3;SLC5A10;SLC5A12
adrenal gland development (GO:0030325)	8/24	0.00379793	0.117629	-1.77745	3.80413	CYP17A1;FSTL3;PDGFRB;STRA6;PBX1;NR3C1;MDK;WT1
reverse cholesterol transport (GO:0043691)	7/16	0.00198837	0.0767091	-1.47388	3.78454	APOE;APOC3;LIPG;ABCA1;APOM;ABCG1;ABCA5
tricarboxylic acid cycle (GO:0006099)	9/29	0.00324516	0.106509	-1.68317	3.7695	ACO2;SUCLG2;ACO1;SUCLG1;OGDHL;IDH1;OGDH;DHTKD1;MDH1
pyridine-containing compound biosynthetic process (GO:0072525)	8/24	0.00379793	0.117629	-1.73784	3.71935	ASPDH;KYNU;HAAO;PNPO;QPRT;KMO;PSAT1;AFMID
cellular response to drug (GO:0035690)	12/49	0.00386893	0.11899	-1.73787	3.69943	DDC;ADSSL1;PPM1E;REN;CRHBP;PDE4A;MT2A;PPP3CB;FBP1;QDPR;MYC;DPEP1
response to toxic substance (GO:0009636)	24/142	0.00522409	0.142475	-1.88151	3.66628	ALPL;DDC;IL6;ASS1;SLC22A8;MAOB;SLC7A8;EPHX2;EPHX1;BPHL;PARK2;ATP7A;CYP17A1;GLYAT;SLC23A1;BLMH;MARC2;PLK1;SCN9A;SLC30A4;PDGFRB;SKIL;PDZD3;HDAC6
cellular biogenic amine metabolic process (GO:0006576)	22/125	0.00483281	0.13538	-1.82099	3.64139	AADAT;CHDH;DDC;ENPP6;KYNU;ACHE;SAT2;ACMSD;KMO;LPIN2;AGMAT;CHPT1;AFMID;ADI1;ATP7A;ALDH7A1;AGPAT6;SMPDL3A;HAAO;DMGDH;SMOX;PCYT1B
cellular amine metabolic process (GO:0044106)	22/125	0.00483281	0.13538	-1.81848	3.63637	AADAT;CHDH;DDC;ENPP6;KYNU;ACHE;SAT2;ACMSD;KMO;LPIN2;AGMAT;CHPT1;AFMID;ADI1;ATP7A;ALDH7A1;AGPAT6;SMPDL3A;HAAO;DMGDH;SMOX;PCYT1B
cellular response to inorganic substance (GO:0071241)	20/110	0.0051352	0.141154	-1.84462	3.61158	MT1L;CRHBP;FSTL3;SLC34A1;FBP1;PARK2;MT1X;HMOX1;MT2A;MT1E;SFTPC;MAPK8;MT1B;OGG1;MT1H;NFATC3;SLC40A1;MT1G;DPEP1;MT1F
renal system process (GO:0003014)	15/71	0.00446739	0.128415	-1.74502	3.58163	HNF1A;PDGFB;LGMN;NPR3;SLC9A3R1;PTPRO;KLHL3;SULF2;REN;SULF1;HAS2;SLC22A6;CYP4F2;HBB;F2R
vitamin biosynthetic process (GO:0009110)	7/17	0.00260867	0.0910548	-1.48813	3.566	AKR1A1;CYP27A1;PNPO;RGN;CYP4F2;PSAT1;PLTP
monosaccharide biosynthetic process (GO:0046364)	13/56	0.003994	0.121983	-1.69079	3.55721	GPD1;SORD;ALDOB;FBP1;PCK2;PCK1;G6PC;SLC25A13;AKR1A1;SLC25A10;RGN;PC;MDH1
response to insulin (GO:0032868)	36/246	0.00624357	0.162481	-1.95339	3.54969	FGF6;PPARA;FGF18;FGF8;PDGFB;ENPP1;PPM1A;PDE3B;ATP6V1B2;SESN3;IGF1R;EIF4EBP1;EIF4EBP2;APOE;FGF1;HADH;ATP6V0D2;FGF2;PIK3R1;FGF3;GHR;PDK2;IL6;KL;GGH;STRADB;ATP6V1D;PCK1;ATP6V1C2;RAB31;GRB10;PKLR;FABP3;ATP6V0A1;ATP6V1G3;THEM4
lipid transport (GO:0006869)	30/193	0.00572534	0.152953	-1.88585	3.54093	PPARA;LDLR;GM2A;ABCA1;ABCA4;ABCA5;APOD;PLIN2;APOE;OSBPL1A;SERPINA5;COL4A3BP;APOC3;APOH;STRA6;APOM;PLTP;OSBPL8;PCTP;ATP11C;SLC9A3R1;ABCG1;MTTP;NPC2;LIPG;FABP3;FABP1;ABCC2;SLC27A2;SCP2
amine metabolic process (GO:0009308)	23/134	0.00524807	0.142475	-1.81703	3.54063	AADAT;CHDH;DDC;ENPP6;KYNU;ACHE;SAT2;ACMSD;KMO;LPIN2;AGMAT;CHPT1;AFMID;ADI1;ATP7A;ALDH7A1;AGPAT6;SMPDL3A;HAAO;DMGDH;SULT1C2;SMOX;PCYT1B
organophosphate ester transport (GO:0015748)	15/71	0.00446739	0.128415	-1.71679	3.52369	LDLR;SLC37A4;PCTP;ABCA1;ATP11C;ABCA4;ABCG1;G6PC;NPC2;SLC17A3;SLC35D1;APOE;SLC35B4;APOC3;SCP2
tissue remodeling (GO:0048771)	15/71	0.00446739	0.128415	-1.70423	3.4979	FGF8;IL6;ENPP1;EPAS1;SLC34A1;FRZB;EPHA2;PLG;ATP7A;DLL4;VEGFA;FOXC1;LRP5;IGFBP5;F2R
positive regulation of lipid metabolic process (GO:0045834)	19/103	0.00549439	0.148247	-1.81974	3.47365	PPARA;FLT1;PDGFB;LDLR;MLXIPL;KIT;ABCG1;IGF1R;CYP17A1;NR1D1;APOE;C1QTNF2;FABP3;PDGFRB;FABP1;FGF1;ANGPTL3;SCP2;FGF2
diterpenoid metabolic process (GO:0016101)	17/87	0.00511578	0.141154	-1.76699	3.4596	SCPEP1;ALDH8A1;LDLR;ADH5;PDE3A;ABCA4;ALDH3A2;TTR;DHRS3;APOE;GPC6;ALDH1A3;APOC3;STRA6;AGRN;LRP2;RETSAT
cellular ion homeostasis (GO:0006873)	53/402	0.00730047	0.181398	-2.01204	3.43468	ATOX1;CALB1;CUL5;ANK2;APOE;HMOX1;DLG4;TRPV4;RGN;SLC4A1;FGF2;ATP6V0D2;MYC;GPR89A;FTL;ACO1;TRPM7;SLC9A3R1;GRM1;ATP6V1D;ATP6V1C2;SLC26A6;PLCE1;RHCG;CA2;ATP6V1G3;PRNP;SLC40A1;ENPP1;CCR1;C5;SLC37A4;PTH1R;ATP6V1B2;CCL28;FTH1;VDR;P2RY2;SLC30A8;SLC31A1;MICU1;SLC8A1;EPHX2;SOD1;ITPR3;TMPRSS3;ATP7A;TFRC;PLCG2;MT2A;ATP6V0A1;ABCC2;F2R
cellular carbohydrate catabolic process (GO:0044275)	9/31	0.00468607	0.132963	-1.6806	3.39092	G6PC;SORD;MIOX;PHKA1;MGAM;GK3P;IDNK;ENOSF1;CALM1
cellular response to hormone stimulus (GO:0032870)	59/462	0.00868586	0.196229	-2.00324	3.26223	FGF6;PPARA;FGF18;FGF8;ADCY8;CRHBP;PDE3B;RORC;EIF4EBP1;EIF4EBP2;HEY1;FGF1;ATP6V0D2;FGF2;FGF3;GHR;AR;RARG;RXRA;SLC34A1;HNF4G;ATP6V1D;SLIT2;SLIT3;ATP6V1C2;GRB10;HNF4A;SSTR1;PKLR;CTSB;ATP6V1G3;THEM4;CTSH;ACVR1;ASS1;ENPP1;PPM1A;PAQR7;KIT;ATP6V1B2;NR3C1;UGT3A2;WT1;VDR;IGF1R;ZNF703;NR1D1;REN;BCAS3;NR1H4;PIK3R1;PDK2;KL;STRADB;CYP17A1;RAB31;ADCY9;PRLR;ATP6V0A1
regulation of angiogenesis (GO:0045765)	28/179	0.00689398	0.173256	-1.85302	3.24832	CYSLTR2;TNFRSF12A;C5;PDE3B;SEMA5A;PTGIS;LRG1;HMOX1;SERPINE1;APOH;BAI3;FGF1;ANGPTL3;FGF2;DDAH1;ANGPT2;IL6;FLT1;KLK3;CHI3L1;SPARC;EPHA2;KDR;SERPINF1;DLL4;SULF1;VEGFA;CTSH
cellular chemical homeostasis (GO:0055082)	58/452	0.00846803	0.192966	-1.96054	3.22557	ATOX1;GRIK5;CALB1;CUL5;ANK2;APOE;HMOX1;DLG4;TRPV4;RGN;SLC4A1;FGF2;ATP6V0D2;MYC;GPR89A;FTL;ACO1;TRPM7;MLXIPL;SLC9A3R1;GRM1;ATP6V1D;ATP6V1C2;PLCE1;SLC26A6;RHCG;CA2;ATP6V1G3;PRNP;SLC40A1;ENPP1;CCR1;C5;SLC37A4;PTH1R;ATP6V1B2;CCL28;FTH1;VDR;P2RY2;APOC3;SLC30A8;SLC31A1;NOX4;MICU1;SLC8A1;EPHX2;PCK2;SOD1;ITPR3;TMPRSS3;ATP7A;TFRC;MT2A;PLCG2;ATP6V0A1;ABCC2;F2R
terpenoid metabolic process (GO:0006721)	18/97	0.00642151	0.165157	-1.77033	3.18812	SCPEP1;ALDH8A1;LDLR;ADH5;PDE3A;CYP2E1;ABCA4;ALDH3A2;TTR;DHRS3;APOE;GPC6;ALDH1A3;APOC3;STRA6;AGRN;LRP2;RETSAT
cellular iron ion homeostasis (GO:0006879)	14/67	0.00641379	0.165157	-1.72417	3.10499	ATP6V1C2;TFRC;ACO1;HMOX1;ATP6V0A1;ATP6V1G3;ATP6V1B2;SOD1;MYC;ATP6V1D;ATP6V0D2;SLC40A1;FTH1;FTL
peptide metabolic process (GO:0006518)	20/113	0.00663756	0.16777	-1.72921	3.08692	GSTA1;NAT8B;NAT8;GSTA2;MME;ANPEP;ENPEP;SOD1;HAGH;TPP1;REN;GPX4;GSTK1;ACE2;IDH1;BDH2;PCSK5;CTSH;DPEP1;MGST2
lung development (GO:0030324)	16/82	0.00656542	0.166906	-1.70612	3.05451	FGF18;EPAS1;FSTL3;CHI3L1;SPARC;GLI3;SLC23A1;WNT7B;EIF4EBP1;VEGFA;LHX3;HEG1;STRA6;LOX;FGF1;CUX1
isoprenoid metabolic process (GO:0006720)	20/114	0.00721158	0.180208	-1.76729	3.02851	SCPEP1;ALDH8A1;LDLR;ADH5;PDE3A;CYP2E1;ABCA4;PHYH;PDSS1;ALDH3A2;TTR;DHRS3;APOE;GPC6;ALDH1A3;APOC3;STRA6;AGRN;LRP2;RETSAT
response to purine-containing compound (GO:0014074)	22/132	0.00836791	0.192966	-1.83427	3.01782	NOX4;GPD1;SLC8A1;IL6;ASS1;CRHBP;PDXP;PDE3A;SPARC;CDO1;BIRC2;WT1;ITPR2;CYP17A1;SLC26A6;P2RX1;REN;P2RX3;PKLR;SFTPC;CASQ2;IGFBP5
negative regulation of cell adhesion (GO:0007162)	20/115	0.00782534	0.186183	-1.77658	2.98647	ASS1;ERBB3;PODXL;PDE3B;SPOCK1;SNAI2;CCL28;PTPRO;PLG;SEMA5A;LPXN;ZNF703;APOD;SERPINE2;SERPINE1;B4GALNT2;BCAS3;ANGPT2;PIK3R1;ADAM15
post-embryonic development (GO:0009791)	16/84	0.00797986	0.188685	-1.76299	2.94009	SLC8A1;ACADM;INVS;ACO1;USP9X;CSRNP1;ATG7;TGFBR1;ZFX;PYGO1;MNX1;SCN9A;HEG1;ETNK2;SEPP1;PPP1R13L
cellular aldehyde metabolic process (GO:0006081)	11/46	0.00647164	0.165478	-1.6223	2.91837	ALDH8A1;ALDH7A1;AKR1A1;ALDH1A3;PDXP;ADH5;PNPO;IDH1;AGXT2;DAO;ALDH3A2
cellular response to metal ion (GO:0071248)	18/99	0.00768117	0.185614	-1.73179	2.91649	MT1L;CRHBP;FSTL3;SLC34A1;FBP1;PARK2;MT1X;HMOX1;MT2A;MT1E;MT1B;OGG1;MT1H;NFATC3;SLC40A1;DPEP1;MT1G;MT1F
polyol metabolic process (GO:0019751)	18/99	0.00768117	0.185614	-1.72564	2.90612	MINPP1;SORD;DAK;SYNJ1;SLC34A1;PCK1;PLCE1;CYP27A1;MIOX;PLCG2;GK3P;ANGPTL3;SCP2;FGF2;INPP5B;DEGS2;IP6K2;CALM1
glucose metabolic process (GO:0006006)	24/149	0.00870047	0.196229	-1.7659	2.87573	GPD1;PDK2;SORD;PFKFB2;ALDOB;SLC37A4;PHKA1;FBP1;PCK2;PCK1;GALM;G6PC;SLC25A13;AKR1A1;APOD;SLC25A10;PKLR;DCXR;UGP2;PC;LRP5;CALM1;MDH1;IGFBP5
dicarboxylic acid biosynthetic process (GO:0043650)	6/11	0.00178902	0.0721845	-1.08624	2.85522	KYNU;GLUD1;GLS;HAAO;ALDH4A1;KMO
L-amino acid transport (GO:0015807)	11/47	0.00740274	0.182906	-1.66174	2.82293	SLC38A5;SLC36A1;SLC36A2;SLC38A3;SLC6A9;SLC25A13;SLC7A2;SLC7A8;SLC7A9;SLC3A1;SLC43A2
mucopolysaccharide metabolic process (GO:1903510)	21/124	0.00844608	0.192966	-1.69984	2.79665	ARSB;MKI67;SPOCK2;LUM;HEXA;CHST5;DCN;NDNF;GLCE;ST3GAL1;SLC35D1;GPC6;VEGFA;ST3GAL6;DSEL;HAS2;B3GNT3;AGRN;FGF2;B4GALT4;B4GALT5
regulation of steroid metabolic process (GO:0019218)	15/77	0.00843726	0.192966	-1.69795	2.79354	FOXA2;EPHX2;RORC;NR3C1;SNAI2;SOD1;ABCG1;IGF1R;VDR;CYP17A1;NR1D1;APOE;FGF1;SCP2;NR1H4
branching morphogenesis of an epithelial tube (GO:0048754)	23/141	0.00887035	0.19904	-1.72721	2.78814	FGF8;FLT1;FOXA2;RASIP1;SOX9;GLI3;EPHA2;WT1;SLIT2;KDR;HOXD11;SEMA5A;VDR;TCF21;DLL4;VEGFA;PBX1;MYC;NFATC3;FGF2;ETV4;LRP5;ACVR1
epithelium development (GO:0060429)	36/256	0.0106475	0.217503	-1.82747	2.78788	PPARA;PDGFB;BTD;FAM212A;APCDD1;SOX9;CALB1;ACAT1;WT1;ALDH3A2;IGF1R;TCF21;SERPINE2;PLOD1;HEG1;POU3F3;STRA6;SOX17;CAT;FGF1;SLC8A1;HPN;RARG;FOXJ1;EDA2R;FZD3;SNAI2;FRZB;EPHA2;SLIT2;KDR;WNT7B;LAMC2;FOXC1;TFAP2C;SLC40A1
branched-chain amino acid catabolic process (GO:0009083)	7/19	0.00428325	0.125585	-1.30443	2.7064	ALDH6A1;IVD;ACAD8;HIBCH;ACAT1;HMGCL;AUH
hormone-mediated signaling pathway (GO:0009755)	17/93	0.00899944	0.200911	-1.67954	2.69549	PPARA;AR;RARG;RXRA;CRHBP;RORC;PAQR7;NR3C1;HNF4G;VDR;PRLR;HNF4A;NR1D1;SSTR1;REN;NR1H4;GHR
negative regulation of locomotion (GO:0040013)	30/204	0.0111378	0.222655	-1.74717	2.62447	PDGFB;AIF1;ABHD6;C5;CCL28;PBLD;SEMA5A;APOD;APOE;HMOX1;SERPINE1;APOH;FGF2;ANGPT2;DPEP1;MAGI2;OSBPL8;DACH1;SLC9A3R1;PTPRO;SLIT2;THY1;DLL4;SULF1;GPR56;TGFBR3;TP53INP1;ADAM15;IGFBP5;SRGAP2
hexose metabolic process (GO:0019318)	28/187	0.011349	0.22585	-1.75921	2.6175	SORD;FUT6;PFKFB2;PHKA1;SLC37A4;ALDOB;GALK2;GALM;AKR1A1;APOD;PDK2;GPD1;FBP1;FUCA2;PCK2;PCK1;KHK;G6PC;SLC25A13;SLC25A10;PKLR;UGP2;DCXR;PC;LRP5;IGFBP5;MDH1;CALM1
second-messenger-mediated signaling (GO:0019932)	22/134	0.00969521	0.213198	-1.69276	2.61622	SLC8A1;NCALD;PDE3A;ITPR3;SOX9;RCAN3;HOMER2;PCLO;KDR;ITPR2;PLCE1;EIF4EBP2;ANK2;BHLHA15;APOE;PLCG2;PDZD3;RASD1;DDAH1;CASQ2;HTR5A;CALM1
regulation of Wnt signaling pathway (GO:0030111)	31/214	0.0119565	0.232676	-1.78335	2.60031	GPR162;PPM1A;SOX7;ZEB2;CDH2;APCDD1;SOX9;GLI3;DAB2;ZNF703;SOX17;PPAP2B;TSKU;CDK14;ASPM;RNF146;GSC;TLE2;SNAI2;FRZB;FZD5;PTPRO;CAPRIN2;ATP6V1C2;GRB10;INVS;SULF2;NXN;SULF1;ROR2;LRP5
primary alcohol metabolic process (GO:0034308)	10/41	0.008232	0.191935	-1.55472	2.56621	TTR;DHRS3;ALDH1B1;ALDH1A3;ALDH2;ADH5;ADH6;ALDH3B2;ALDH3A2;RETSAT
cellular response to hydrogen peroxide (GO:0070301)	13/62	0.00824824	0.191935	-1.53378	2.53166	IL6;EZH2;HBA1;PXDNL;MAP3K5;GPX4;GPX3;FABP1;MAPK8;CAT;HBB;HDAC6;NET1
organic hydroxy compound transport (GO:0015850)	18/102	0.00993711	0.215288	-1.63621	2.51286	LDLR;PARK2;ABCA1;SLC9A3R1;ABCG1;ABCA5;SLC16A1;SLC26A6;NPC2;P2RX1;APOE;APOC3;LIPG;SLC22A4;STRA6;SLC22A5;APOM;PDZK1
response to hydrogen peroxide (GO:0042542)	17/95	0.0107216	0.217503	-1.64194	2.50486	IL6;OLR1;EZH2;HBA1;SOD1;PXDNL;MAP3K5;HMOX1;GPX4;GPX3;PDGFRB;FABP1;MAPK8;CAT;HBB;HDAC6;NET1
protein homotetramerization (GO:0051289)	12/54	0.00745858	0.183256	-1.46531	2.48645	SHMT1;PCBD1;GLS;RXRA;GPX3;FBP1;DPYS;ACOT13;CBR4;CAT;KCNJ12;DCXR
iron ion transport (GO:0006826)	12/56	0.00947219	0.209764	-1.59042	2.48388	ATP6V1C2;TFRC;ATP6V0A1;SFXN1;ATP6V1G3;ATP6V1B2;STEAP2;ATP6V1D;ATP6V0D2;SLC40A1;FTH1;FTL
neuromuscular process (GO:0050905)	15/79	0.0102544	0.217503	-1.62513	2.47921	GLRB;GM2A;FGF14;PEX5;PCDH15;PARK2;HERC1;GCH1;HOXA1;TPP1;CLIC5;ALDH1A3;SPG20;DLG4;STRA6
skeletal system development (GO:0001501)	25/162	0.0118269	0.232657	-1.67914	2.44851	ALPL;ARSE;TGFBR1;PTH1R;FAM20C;POSTN;NPR3;SOX9;FRZB;ANKH;EPHA2;VDR;RPS6KA3;SULF2;SLC35D1;TRPS1;TEAD4;SULF1;FOXC1;HOXB9;PBX1;BMPR1B;PCSK5;IGFBP4;CDH11
phospholipid homeostasis (GO:0055091)	6/10	0.00124423	0.0563263	-0.843691	2.42696	HNF4A;LIPG;FABP3;ABCA1;ANGPTL3;ABCG1
cellular response to organic cyclic compound (GO:0071407)	39/291	0.0155927	0.269987	-1.84754	2.41913	ALPL;PPARA;CYP24A1;PDGFB;ASS1;CRHBP;RORC;PAQR7;NR3C1;ABCA1;UGT3A2;WT1;VDR;SLC16A1;ZNF703;NR1D1;HEY1;APOE;BCAS3;NR1H4;NOX4;GPD1;SLC8A1;AR;RARG;RXRA;PDXP;SLC34A1;PDE3A;PARK2;HNF4G;ITPR2;SLC26A6;HNF4A;ITGA6;SSTR1;CASQ2;ACVR1;IGFBP5
aminoglycan metabolic process (GO:0006022)	26/171	0.0121877	0.23549	-1.66519	2.40801	ARSB;GAL3ST3;SPOCK2;HEXA;LUM;UGDH;DCN;ST3GAL1;SLC35D1;GPC6;DSEL;ST3GAL6;B3GNT3;AGRN;FGF2;B4GALT4;B4GALT5;MKI67;CHI3L1;CHST5;NDNF;GLCE;VEGFA;PDGFRB;FOXC1;HAS2
response to peptide hormone (GO:0043434)	47/364	0.0151016	0.265667	-1.80509	2.39267	FGF6;PPARA;FGF18;FGF8;PDGFB;ENPP1;ASS1;ADCY8;CRHBP;PPM1A;PDE3B;ATP6V1B2;SESN3;IGF1R;EIF4EBP1;EIF4EBP2;APOE;APOC3;FGF1;HADH;ATP6V0D2;FGF2;PIK3R1;FGF3;GHR;PDK2;IL6;GATM;KL;SLC34A1;GGH;QDPR;SPARC;STRADB;CDO1;ATP6V1D;PCK1;ATP6V1C2;RAB31;GRB10;ADCY9;PKLR;FABP3;ATP6V0A1;ATP6V1G3;THEM4;LRP5
erythrose 4-phosphate/phosphoenolpyruvate family amino acid metabolic process (GO:1902221)	6/10	0.00124423	0.0563263	-0.793911	2.28376	PCBD1;QDPR;HGD;PAH;HPD;FAH
response to alcohol (GO:0097305)	37/274	0.0164852	0.277784	-1.77944	2.27931	ALPL;CYP24A1;PDGFB;ASS1;CRHBP;ADH6;RORC;ABCA1;PSPH;VDR;EIF4EBP1;ZNF703;APOE;GPX4;HTR5A;GHR;TGFBR1;MAOB;SLC34A1;GGH;CYP2E1;SPARC;CDO1;SOD1;TPMT;BIRC2;SLIT2;ITPR2;SLIT3;SSTR1;SLC25A36;PDGFRB;ABAT;OGG1;CD14;TP53INP1;CALM1
insulin receptor signaling pathway (GO:0008286)	23/148	0.014305	0.258903	-1.68422	2.27589	FGF6;PDK2;FGF18;FGF8;KL;PPM1A;PDE3B;ATP6V1B2;STRADB;ATP6V1D;ATP6V1C2;IGF1R;GRB10;EIF4EBP1;EIF4EBP2;ATP6V0A1;ATP6V1G3;FGF1;THEM4;FGF2;ATP6V0D2;PIK3R1;FGF3
neutral lipid biosynthetic process (GO:0046460)	10/43	0.0108098	0.217503	-1.47408	2.24877	GPD1L;GPD1;PLCE1;AGPAT6;ELOVL2;AGPAT9;LCLAT1;LPIN2;PNPLA3;AGPAT3
angiogenesis (GO:0001525)	33/236	0.0150036	0.265004	-1.69098	2.24564	FGF6;FGF18;TNFRSF12A;PDE3B;ANPEP;ENPEP;EPHB3;MEIS1;EPHB2;SHB;APOD;HEY1;HMOX1;SERPINE1;SOX17;FGF1;ANGPT2;C1GALT1;CEACAM1;SLC12A6;FLT1;EPAS1;TGFBR1;RASIP1;FZD5;EPHA2;KDR;THY1;MEOX2;DLL4;VEGFA;GPR56;ADAM15
L-phenylalanine metabolic process (GO:0006558)	6/10	0.00124423	0.0563263	-0.776283	2.23305	PCBD1;QDPR;HGD;PAH;HPD;FAH
acylglycerol biosynthetic process (GO:0046463)	10/43	0.0108098	0.217503	-1.46241	2.23097	GPD1L;GPD1;PLCE1;AGPAT6;ELOVL2;AGPAT9;LCLAT1;LPIN2;PNPLA3;AGPAT3
L-phenylalanine catabolic process (GO:0006559)	6/9	0.000835955	0.04508	-0.71891	2.22813	PCBD1;QDPR;HGD;PAH;HPD;FAH
cellular response to steroid hormone stimulus (GO:0071383)	20/123	0.0144078	0.259284	-1.64799	2.22451	PPARA;AR;RARG;ASS1;CRHBP;RXRA;RORC;PAQR7;NR3C1;HNF4G;UGT3A2;VDR;ZNF703;NR1D1;HNF4A;HEY1;SSTR1;BCAS3;NR1H4;ACVR1
retinoid metabolic process (GO:0001523)	15/81	0.0123664	0.2375	-1.53154	2.20172	SCPEP1;ALDH8A1;LDLR;ADH5;ABCA4;TTR;DHRS3;APOE;GPC6;ALDH1A3;APOC3;STRA6;AGRN;LRP2;RETSAT
tryptophan catabolic process (GO:0006569)	6/11	0.00178902	0.0721845	-0.83491	2.19458	AADAT;KYNU;HAAO;ACMSD;KMO;AFMID
catechol-containing compound metabolic process (GO:0009712)	10/43	0.0108098	0.217503	-1.43822	2.19407	RNF180;ATP7A;DDC;SNCAIP;EPAS1;MAOB;PAH;DAO;PARK2;GCH1
metanephric epithelium development (GO:0072207)	6/13	0.00339631	0.109831	-0.989932	2.18658	WNT7B;PDGFB;POU3F3;ACAT1;CALB1;WT1
catecholamine metabolic process (GO:0006584)	10/43	0.0108098	0.217503	-1.43022	2.18187	RNF180;ATP7A;DDC;SNCAIP;EPAS1;MAOB;PAH;DAO;PARK2;GCH1
hexose biosynthetic process (GO:0019319)	11/50	0.0108306	0.217503	-1.42557	2.17477	GPD1;G6PC;SLC25A13;SORD;SLC25A10;ALDOB;FBP1;PCK2;PC;PCK1;MDH1
sulfur compound catabolic process (GO:0044273)	10/43	0.0108098	0.217503	-1.42414	2.17259	TST;ARSB;SUOX;SLC25A10;LUM;HEXA;DCN;PCYOX1;CDO1;CBS
negative regulation of wound healing (GO:0061045)	11/50	0.0108306	0.217503	-1.42166	2.16881	PDGFB;SERPINE2;APOE;KLKB1;SERPINE1;APOH;CD109;CYP4F2;PROS1;FGF2;PLG
erythrose 4-phosphate/phosphoenolpyruvate family amino acid catabolic process (GO:1902222)	6/9	0.000835955	0.04508	-0.695679	2.15613	PCBD1;QDPR;HGD;PAH;HPD;FAH
oxaloacetate metabolic process (GO:0006107)	6/11	0.00178902	0.0721845	-0.815325	2.14311	NIT2;PCK2;PC;GHR;PCK1;MDH1
regulation of cellular response to growth factor stimulus (GO:0090287)	26/176	0.0164499	0.277784	-1.66438	2.13192	FGF18;PDGFB;FAM20C;CD109;PPM1A;PRDM16;PBLD;OFD1;DAB2;ZNF703;HTRA1;LRG1;SKIL;FLT1;TGFBR1;SLIT2;NREP;SKOR1;GRB10;TRIM33;SULF2;NEDD4;ITGA8;SULF1;VEGFA;TGFBR3
cellular response to nutrient (GO:0031670)	7/22	0.00816788	0.191935	-1.28901	2.12763	VDR;PDK2;CYP24A1;FOXA2;HMOX1;RRP8;NR1H4
regulation of phosphatidylinositol 3-kinase signaling (GO:0014066)	13/66	0.0126585	0.242053	-1.49506	2.12089	FLT1;PDGFB;SERPINE2;ERBB3;NEDD4;ENTPD5;PDGFRB;KIT;CAT;SOX9;SLC9A3R1;F2R;KDR
cellular response to nitrogen compound (GO:1901699)	54/438	0.0204683	0.309921	-1.79969	2.10822	FGF6;FGF18;FGF8;ADCY8;CPEB4;CRHBP;PDE3B;EIF4EBP1;MAP3K5;EIF4EBP2;PDGFC;FGF1;ATP6V0D2;FGF2;FGF3;DPEP1;GHR;DDC;ARHGEF2;SLC34A1;PDXP;ATP6V1D;SLIT2;ATP6V1C2;SLC26A6;GRB10;PKLR;MAPK8;ATP6V1G3;THEM4;CASQ2;ASS1;ENPP1;PPM1A;ATP6V1B2;SOX9;WT1;IGF1R;SFTPC;NR1H4;PIK3R1;NOX4;PDK2;GPD1;SLC8A1;KL;PDE3A;PARK2;STRADB;ITPR2;RAB31;ADCY9;ATP6V0A1;IGFBP5
regulation of blood pressure (GO:0008217)	21/133	0.0161815	0.274774	-1.62905	2.10442	SCPEP1;PPARA;NCALD;ADH5;WNK1;EPHX2;NPR3;ENPEP;SOD1;AGTRAP;GCH1;ACSM3;P2RX1;REN;HMOX1;ACE2;ABAT;CYP4F2;HBB;DDAH1;LRP5
alcohol catabolic process (GO:0046164)	11/51	0.0122082	0.23549	-1.44443	2.08877	CYP24A1;SORD;SMPDL3A;APOE;ALDH1B1;SYNJ1;MIOX;ALDH2;ADH5;ALDH3B2;GK3P
indole-containing compound catabolic process (GO:0042436)	6/11	0.00178902	0.0721845	-0.789287	2.07466	AADAT;KYNU;HAAO;ACMSD;KMO;AFMID
chemical homeostasis within a tissue (GO:0048875)	6/12	0.00249702	0.0885637	-0.840204	2.03668	EPAS1;VEGFA;CTSH;HOMER2;GPR116;KDR
indolalkylamine catabolic process (GO:0046218)	6/11	0.00178902	0.0721845	-0.772299	2.03001	AADAT;KYNU;HAAO;ACMSD;KMO;AFMID
steroid hormone mediated signaling pathway (GO:0043401)	12/59	0.0132545	0.24966	-1.44637	2.00706	VDR;PPARA;AR;RARG;NR1D1;HNF4A;RXRA;PAQR7;RORC;HNF4G;NR3C1;NR1H4
glycerolipid metabolic process (GO:0046486)	39/296	0.0194511	0.301218	-1.62839	1.95394	ACHE;SYNJ1;SLC37A4;PIP5K1B;GPD1L;SH3YL1;AGPAT6;APOE;ELOVL2;AGPAT9;PIKFYVE;APOC3;SLC22A4;APOH;PLCD4;MGLL;ETNK2;CAT;PCYT1B;AGPAT3;INPP5B;FGF2;PIK3R1;IP6K2;GPD1;PLD1;PI4KA;CYP2E1;LPIN2;PNPLA3;CHPT1;MTTP;CWH43;PLCE1;G6PC;PLCG2;PDGFRB;LCLAT1;PIP4K2A
sulfur amino acid catabolic process (GO:0000098)	6/12	0.00249702	0.0885637	-0.802824	1.94607	TST;SUOX;SLC25A10;PCYOX1;CDO1;CBS
activation of protein kinase activity (GO:0032147)	34/252	0.021053	0.309921	-1.65723	1.94134	PDGFB;ADCY8;C5;TNFSF15;IQGAP3;KIT;MAP3K5;DAB2;C1QTNF2;PDGFC;FGF2;GHR;IRAK2;IRAK1;TNIK;CCDC88A;TGFBR1;CHI3L1;ITGA1;STRADB;MAPK10;SOD1;GRM1;PLCE1;WNT7B;MAP3K15;ADCY9;PRLR;TXN;VEGFA;GADD45B;MAP3K13;GADD45A;F2R
response to organophosphorus (GO:0046683)	19/118	0.0182149	0.287948	-1.55021	1.92997	NOX4;GPD1;ASS1;CRHBP;PDXP;PDE3A;SPARC;CDO1;BIRC2;WT1;ITPR2;CYP17A1;SLC26A6;P2RX1;REN;P2RX3;PKLR;SFTPC;IGFBP5
positive regulation of steroid metabolic process (GO:0045940)	7/23	0.00990765	0.215288	-1.2359	1.89807	IGF1R;CYP17A1;NR1D1;APOE;FGF1;SCP2;ABCG1
regulation of steroid biosynthetic process (GO:0050810)	11/53	0.0153585	0.267704	-1.43254	1.8879	VDR;IGF1R;CYP17A1;NR1D1;APOE;NR3C1;FGF1;SOD1;SNAI2;ABCG1;NR1H4
response to peptide (GO:1901652)	48/384	0.0227692	0.324562	-1.67357	1.88323	FGF6;PPARA;FGF18;FGF8;PDGFB;ENPP1;ASS1;ADCY8;CRHBP;PPM1A;PDE3B;ATP6V1B2;SESN3;IGF1R;EIF4EBP1;EIF4EBP2;APOE;APOC3;FGF1;HADH;ATP6V0D2;FGF2;PIK3R1;FGF3;GHR;PDK2;ARHGEF2;IL6;GATM;KL;SLC34A1;GGH;QDPR;SPARC;STRADB;CDO1;ATP6V1D;PCK1;ATP6V1C2;RAB31;GRB10;ADCY9;PKLR;FABP3;ATP6V0A1;ATP6V1G3;THEM4;LRP5
inorganic anion transmembrane transport (GO:0098661)	18/108	0.0160187	0.273063	-1.44933	1.8813	SLC12A6;SLC12A7;GLRB;SLC12A3;ANO1;ANKH;SLC26A4;SLC26A6;SLC17A3;RHCG;SLC26A7;CLIC5;SLC17A1;SLC13A1;PCYOX1;SLC4A1;ANO6;ANO10
establishment of protein localization to plasma membrane (GO:0090002)	12/60	0.0147421	0.261435	-1.40217	1.88112	RAB31;TESC;KRT18;TSPAN33;ANK2;ANK3;MPP5;SPTBN1;TSPAN15;GOLGA4;PDZK1;EHD3
NADH metabolic process (GO:0006734)	6/8	0.000539252	0.0338804	-0.555284	1.87959	GPD1L;GPD1;ALDOB;PCK2;OGDH;MDH1
urate metabolic process (GO:0046415)	6/13	0.00339631	0.109831	-0.846274	1.86926	G6PC;SLC17A3;SLC22A12;SLC17A1;SLC16A9;SLC22A11
thioester metabolic process (GO:0035383)	12/60	0.0147421	0.261435	-1.33234	1.78743	AADAT;GLYAT;AGPAT6;KYNU;SUCLG2;SUCLG1;ACSM2A;ELOVL2;AASS;OGDH;PIPOX;HMGCL
acyl-CoA metabolic process (GO:0006637)	12/60	0.0147421	0.261435	-1.32551	1.77826	AADAT;GLYAT;AGPAT6;KYNU;SUCLG2;SUCLG1;ACSM2A;ELOVL2;AASS;OGDH;PIPOX;HMGCL
glycosaminoglycan metabolic process (GO:0030203)	24/162	0.0200251	0.307938	-1.50454	1.77213	ARSB;MKI67;SPOCK2;LUM;HEXA;UGDH;DCN;CHST5;NDNF;GLCE;ST3GAL1;SLC35D1;GPC6;VEGFA;ST3GAL6;DSEL;PDGFRB;HAS2;FOXC1;B3GNT3;AGRN;FGF2;B4GALT4;B4GALT5
gluconeogenesis (GO:0006094)	10/46	0.0157668	0.270869	-1.33455	1.74309	GPD1;G6PC;SLC25A13;SLC25A10;ALDOB;FBP1;PCK2;PC;PCK1;MDH1
cholesterol efflux (GO:0033344)	7/23	0.00990765	0.215288	-1.13297	1.73999	NPC2;APOE;APOC3;ABCA1;APOM;ABCG1;ABCA5
amino sugar metabolic process (GO:0006040)	9/38	0.0138621	0.252969	-1.25898	1.73045	ST3GAL1;GNPDA1;GFPT2;FN3K;MGEA5;B4GALNT2;NPL;CHI3L1;CHST5
tissue homeostasis (GO:0001894)	20/129	0.0217422	0.317681	-1.45226	1.66532	NOX4;CUBN;EPAS1;PTH1R;LYZ;ACP5;SOD1;SOX9;HOMER2;KDR;PBLD;AZGP1;ALB;TPP1;VEGFA;PDGFRB;CTSH;MUC13;GPR116;F2R
epithelial cell differentiation (GO:0030855)	39/303	0.0260963	0.345697	-1.56438	1.66167	MTSS1;FGF8;FOXA2;MLPH;C10ORF11;FN3K;HPS4;FAM20C;KIT;SOX9;GLI3;WT1;TCF21;DAB2;ZNF703;HEY1;MCOLN3;TPP1;GSTK1;WDR77;TGM3;BDH2;SOX17;SKIL;GSTA1;MAF;GSTA2;RXRA;PTPRO;EPHA2;KDR;TST;SYNE4;PRLR;RHCG;VEGFA;USH1C;CTSB;CUX1
carbohydrate biosynthetic process (GO:0016051)	20/130	0.0232028	0.324562	-1.45262	1.6346	GPD1;SORD;ACADM;ALDOB;FBP1;PCK2;CERCAM;PCK1;G6PC;SLC25A13;AKR1A1;ST8SIA6;NR1D1;SLC25A10;GFPT2;RGN;HAS2;UGP2;PC;MDH1
cellular response to organonitrogen compound (GO:0071417)	50/411	0.0301766	0.374409	-1.64702	1.61804	FGF6;FGF18;FGF8;ENPP1;ASS1;ADCY8;CRHBP;CPEB4;PPM1A;PDE3B;ATP6V1B2;SOX9;WT1;IGF1R;EIF4EBP1;EIF4EBP2;PDGFC;FGF1;FGF2;ATP6V0D2;PIK3R1;NR1H4;FGF3;GHR;NOX4;GPD1;DDC;PDK2;SLC8A1;ARHGEF2;KL;PDXP;SLC34A1;PDE3A;PARK2;STRADB;ATP6V1D;SLIT2;ITPR2;ATP6V1C2;RAB31;GRB10;SLC26A6;ADCY9;PKLR;ATP6V0A1;ATP6V1G3;THEM4;CASQ2;IGFBP5
response to glucocorticoid (GO:0051384)	20/130	0.0232028	0.324562	-1.42975	1.60887	ALPL;IL6;ASS1;MAOB;SPARC;NR3C1;CDO1;PCK2;MDK;SLIT2;SLIT3;WNT7B;SERPINF1;HNMT;HEY1;PAPPA;SFTPC;GHR;CALM1;ACVR1
amino acid transmembrane transport (GO:0003333)	10/46	0.0157668	0.270869	-1.23117	1.60806	SLC38A5;SLC36A1;SLC36A2;SLC6A9;SLC7A2;SLC7A8;SLC7A9;SLC3A1;SLC43A2;SLC7A7
regulation of carbohydrate biosynthetic process (GO:0043255)	14/79	0.0207441	0.309921	-1.36874	1.60339	PPARA;PDK2;IL6;ACADM;PDGFB;ENPP1;PTH1R;SMEK2;FBP1;NR3C1;GRB10;NR1D1;SLC35B4;C1QTNF2
high-density lipoprotein particle remodeling (GO:0034375)	6/14	0.0045159	0.128967	-0.773655	1.5846	APOE;APOC3;LIPG;APOM;ABCG1;ABCA5
organic hydroxy compound biosynthetic process (GO:1901617)	24/166	0.0251952	0.338863	-1.45781	1.57758	ACOX2;ACAA2;SHMT1;DDC;ACHE;ACADM;PAH;LPIN2;CHPT1;BBOX1;GCH1;PCK1;ATP7A;AGPAT6;CYP27A1;PLCG2;PNPO;DAO;PCYT1B;PSAT1;SCP2;SLC27A2;FGF2;PLTP
bicarbonate transport (GO:0015701)	8/31	0.0132572	0.24966	-1.12573	1.56213	SLC26A6;SLC26A7;CA12;HBA1;CA2;SLC4A1;SLC4A4;HBB
glutamine family amino acid catabolic process (GO:0009065)	7/24	0.0119026	0.232657	-1.06551	1.55372	GLUD1;GLS;PRODH2;ALDH4A1;DAO;DDAH1;FAH
response to interleukin-1 (GO:0070555)	13/71	0.0204965	0.309921	-1.29912	1.52184	IRAK2;IRAK1;CHI3L1;YTHDC2;SOX9;MTHFR;PTGIS;HNMT;APOE;PYCARD;HAS2;SLC30A8;GHR
copper ion homeostasis (GO:0055070)	6/15	0.00588529	0.154069	-0.81298	1.52056	ATP7A;ATOX1;MT2A;COMMD1;PRNP;SLC31A1
carbohydrate phosphorylation (GO:0046835)	7/24	0.0119026	0.232657	-1.04202	1.51947	GALK2;KHK;GNPTAB;PFKFB2;DAK;RBKS;XYLB
endocrine pancreas development (GO:0031018)	9/39	0.0158421	0.271103	-1.16386	1.51913	IL6;HNF4A;FOXA2;SLC2A2;PKLR;MNX1;PDE3B;HNF4G;SOX9
motor neuron axon guidance (GO:0008045)	7/25	0.014172	0.257555	-1.11288	1.50965	ALCAM;HOXA1;FGF8;LHX3;MNX1;ETV4;SLIT2
sulfur compound transport (GO:0072348)	8/32	0.0154	0.267704	-1.14455	1.50837	SLC26A4;SLC26A6;SLC26A7;SLC22A8;SLC13A1;SLC7A9;SLC3A1;SLC9A3R1
cellular response to insulin stimulus (GO:0032869)	27/195	0.0285224	0.370034	-1.49923	1.49047	FGF6;FGF18;FGF8;ENPP1;PPM1A;PDE3B;ATP6V1B2;IGF1R;EIF4EBP1;EIF4EBP2;FGF1;ATP6V0D2;FGF2;FGF3;PIK3R1;GHR;PDK2;KL;STRADB;ATP6V1D;ATP6V1C2;RAB31;GRB10;PKLR;ATP6V0A1;ATP6V1G3;THEM4
mesenchyme development (GO:0060485)	11/55	0.0190826	0.296556	-1.22309	1.48669	TSPY3;WNT7B;TSPY1;ERBB3;NEDD4;TSPY4;BNC2;PDGFRB;TEAD2;SIX4;WT1
regulation of chondrocyte differentiation (GO:0032330)	9/41	0.0204115	0.309921	-1.26673	1.48389	MAF;FGF18;RARG;TRPS1;TGFBR1;SNAI2;SOX9;GLI3;HOXD11
regulation of cell adhesion (GO:0030155)	42/336	0.031506	0.379625	-1.51635	1.46869	FOXA2;ASS1;NUAK1;SPOCK2;ERBB3;FSTL3;PDE3B;SPOCK1;EPHB3;SOX9;CCL28;SEMA5A;LPXN;DAB2;ZNF703;WDPCP;APOD;SERPINE2;ANK3;SERPINE1;B4GALNT2;BCAS3;ANGPT2;PIK3R1;DPP4;NET1;TESC;PODXL;SNAI2;SERPINI1;PTPRO;NDNF;PLG;EPHA2;KDR;PRLR;ITGA6;FBLN2;VEGFA;GPR56;HAS2;ADAM15
JNK cascade (GO:0007254)	11/55	0.0190826	0.296556	-1.19809	1.4563	IRAK2;IRAK1;MAP3K5;SH2D3A;FGF14;ROR2;MAPK8;MAPK10;STRADB;DUSP9;MAP3K13
phospholipid transport (GO:0015914)	10/48	0.019899	0.307074	-1.21438	1.43378	NPC2;LDLR;APOE;PCTP;APOC3;ATP11C;ABCA1;ABCA4;SCP2;ABCG1
pteridine-containing compound metabolic process (GO:0042558)	8/32	0.0154	0.267704	-1.07697	1.41931	SHMT1;MTHFS;FOLH1;MTHFR;PCBD1;QDPR;PIPOX;GCH1
protein heterooligomerization (GO:0051291)	14/81	0.0245343	0.332006	-1.25046	1.37876	GLRB;MAGI2;PCBD1;HBA1;ITPR3;PDSS1;BIRC2;GCH1;IGF1R;P2RX1;RRM2;C1QTNF2;SKIL;HBB
response to thyroid hormone (GO:0097066)	6/15	0.00588529	0.154069	-0.736538	1.37759	HPN;SLC34A1;AK2;KIT;CTSB;CTSH
keratan sulfate metabolic process (GO:0042339)	8/33	0.0177827	0.285432	-1.08856	1.36479	ST3GAL1;LUM;HEXA;ST3GAL6;B3GNT3;CHST5;B4GALT4;B4GALT5
hydrogen peroxide metabolic process (GO:0042743)	8/33	0.0177827	0.285432	-1.08652	1.36223	GPX4;GPX3;MAOB;HBA1;CAT;SOD1;HBB;PXDNL
cellular response to nutrient levels (GO:0031669)	16/99	0.0278399	0.362249	-1.32173	1.34212	WDFY3;CYP24A1;PDK2;FOXA2;CPEB4;RRP8;ATG2B;VDR;DNAJC15;ALB;ATG7;HMOX1;SLC39A5;TNRC6A;NR1H4;HDAC6
regulation of lipoprotein lipase activity (GO:0051004)	8/33	0.0177827	0.285432	-1.06881	1.34002	MAGI2;CMYA5;APOC3;ITGA1;APOH;PDGFRB;ANGPTL3;CALM1
epithelial cell migration (GO:0010631)	12/65	0.0241471	0.328789	-1.20261	1.3377	FGF8;WDPCP;PKN3;TGFBR1;VEGFA;FERMT1;ZEB2;KIT;FGF2;SLIT2;DPP4;KDR
glucose homeostasis (GO:0042593)	21/143	0.0303674	0.374409	-1.36124	1.33729	NOX4;PDK2;HNF1A;ACSM2A;C5;SLC37A4;MLXIPL;GRIK5;PDE3B;PCK2;PCK1;SESN3;ANKRD26;G6PC;SLC16A1;HNF4A;BHLHA15;APOC3;SLC30A8;GPR116;IGFBP5
carbohydrate homeostasis (GO:0033500)	21/143	0.0303674	0.374409	-1.3586	1.3347	NOX4;PDK2;HNF1A;ACSM2A;C5;SLC37A4;MLXIPL;GRIK5;PDE3B;PCK2;PCK1;SESN3;ANKRD26;G6PC;SLC16A1;HNF4A;BHLHA15;APOC3;SLC30A8;GPR116;IGFBP5
triglyceride biosynthetic process (GO:0019432)	9/41	0.0204115	0.309921	-1.12302	1.31555	GPD1L;GPD1;AGPAT6;ELOVL2;AGPAT9;LCLAT1;LPIN2;PNPLA3;AGPAT3
phenol-containing compound metabolic process (GO:0018958)	14/81	0.0245343	0.332006	-1.18119	1.30238	RNF180;ATP7A;DDC;CYP17A1;SNCAIP;EPAS1;MAOB;FOXE1;PAH;DAO;PARK2;DIO1;GCH1;IYD
glutathione metabolic process (GO:0006749)	10/49	0.0222386	0.32386	-1.12148	1.26441	HAGH;GSTA1;GSTA2;NAT8;GPX4;GSTK1;IDH1;SOD1;DPEP1;MGST2
glycosaminoglycan biosynthetic process (GO:0006024)	16/99	0.0278399	0.362249	-1.24383	1.26302	LUM;UGDH;CHST5;DCN;GLCE;ST3GAL1;SLC35D1;GPC6;ST3GAL6;DSEL;PDGFRB;HAS2;B3GNT3;AGRN;B4GALT4;B4GALT5
cellular cation homeostasis (GO:0030003)	47/389	0.0379781	0.422701	-1.44668	1.24572	ATOX1;CCR1;C5;PTH1R;SLC37A4;ATP6V1B2;CCL28;CALB1;FTH1;VDR;CUL5;ANK2;APOE;HMOX1;DLG4;TRPV4;RGN;SLC30A8;MYC;SLC31A1;ATP6V0D2;FGF2;GPR89A;FTL;MICU1;SLC8A1;TRPM7;ACO1;EPHX2;ITPR3;SOD1;ATP6V1D;GRM1;TMPRSS3;ATP7A;ATP6V1C2;PLCE1;SLC26A6;TFRC;MT2A;PLCG2;ATP6V0A1;CA2;ATP6V1G3;PRNP;SLC40A1;F2R
anatomical structure homeostasis (GO:0060249)	28/208	0.0345646	0.403223	-1.36519	1.23996	SGCZ;FGGY;PTH1R;ACP5;SOX9;PBLD;AZGP1;TPP1;ALB;HAAO;NSMCE2;MUC13;NOX4;IL6;CUBN;EPAS1;LYZ;SMC6;PARK2;SOD1;HOMER2;KDR;POLD3;VEGFA;PDGFRB;CTSH;F2R;GPR116
cellular metal ion homeostasis (GO:0006875)	44/361	0.039032	0.429157	-1.42702	1.20716	ATOX1;CCR1;C5;PTH1R;SLC37A4;ATP6V1B2;CCL28;CALB1;FTH1;VDR;CUL5;ANK2;APOE;HMOX1;DLG4;TRPV4;RGN;SLC30A8;MYC;SLC31A1;ATP6V0D2;FGF2;FTL;MICU1;SLC8A1;TRPM7;ACO1;EPHX2;ITPR3;SOD1;ATP6V1D;GRM1;TMPRSS3;ATP7A;ATP6V1C2;PLCE1;TFRC;MT2A;PLCG2;ATP6V0A1;ATP6V1G3;PRNP;SLC40A1;F2R
aminoglycan biosynthetic process (GO:0006023)	16/100	0.0299034	0.374409	-1.22427	1.20273	LUM;UGDH;CHST5;DCN;GLCE;ST3GAL1;SLC35D1;GPC6;ST3GAL6;DSEL;PDGFRB;HAS2;B3GNT3;AGRN;B4GALT4;B4GALT5
negative regulation of cell-substrate adhesion (GO:0010812)	9/42	0.0230215	0.324562	-1.05725	1.1897	APOD;SERPINE1;SPOCK1;BCAS3;ANGPT2;PTPRO;PLG;PIK3R1;ADAM15
cholesterol transport (GO:0030301)	9/42	0.0230215	0.324562	-1.0546	1.18672	NPC2;LDLR;APOE;APOC3;LIPG;ABCA1;APOM;ABCG1;ABCA5
sterol transport (GO:0015918)	9/42	0.0230215	0.324562	-1.04576	1.17678	NPC2;LDLR;APOE;APOC3;LIPG;ABCA1;APOM;ABCG1;ABCA5
negative regulation of epithelial cell proliferation (GO:0050680)	17/110	0.0332848	0.399964	-1.27159	1.16526	MTSS1;HPN;TGFBR1;SFN;SPARC;SNAI2;SOX9;PBLD;VDR;SERPINF1;APOE;SULF1;WDR77;APOH;TGFBR3;EAF2;ETV4
tube development (GO:0035295)	23/164	0.0365504	0.421602	-1.34467	1.16138	SLC8A1;ASS1;FOXJ1;ITGB4;FAM212A;KIT;SOX9;GLI3;CALB1;ACAT1;EPHA2;WT1;SLIT2;TCF21;WNT7B;ITGA6;POU3F3;FOXC1;STRA6;CAT;SOX17;PCSK5;NR1H4
sulfur compound biosynthetic process (GO:0044272)	21/145	0.0340792	0.403223	-1.26532	1.14924	BHMT2;LUM;CHST5;DCN;CDO1;GLCE;HAGH;ST3GAL1;ADI1;MTHFR;SLC35D1;ST3GAL6;BHMT;ELOVL2;DSEL;LIAS;B3GNT3;B4GALT4;CBS;B4GALT5;MGST2
reactive oxygen species metabolic process (GO:0072593)	14/84	0.0311518	0.376878	-1.17438	1.146	NOX4;PDGFB;MAOB;EPHX2;HBA1;SOD1;PXDNL;ATP7A;GPX4;GPX3;CAT;PLA2R1;HBB;FANCC
metanephros development (GO:0001656)	8/35	0.02332	0.324562	-1.0088	1.13519	IRX3;FGF8;ITGA8;GLI3;CTSH;SLIT2;WT1;HOXD11
cAMP catabolic process (GO:0006198)	6/16	0.00753405	0.184082	-0.668202	1.13085	PDE7A;PDE4A;PDE3B;PDE10A;PDE3A;PDE8A
trivalent inorganic cation transport (GO:0072512)	8/35	0.02332	0.324562	-0.988183	1.11198	ATP6V1C2;TFRC;ATP6V0A1;ATP6V1G3;ATP6V1B2;STEAP2;ATP6V1D;ATP6V0D2
ferric iron transport (GO:0015682)	8/35	0.02332	0.324562	-0.972095	1.09388	ATP6V1C2;TFRC;ATP6V0A1;ATP6V1G3;ATP6V1B2;STEAP2;ATP6V1D;ATP6V0D2
NAD biosynthetic process (GO:0009435)	6/17	0.00949135	0.209764	-0.697863	1.0899	ASPDH;KYNU;HAAO;QPRT;KMO;AFMID
positive regulation of phosphatidylinositol 3-kinase signaling (GO:0014068)	10/51	0.0275048	0.360018	-1.04129	1.06378	FLT1;PDGFB;ERBB3;NEDD4;PDGFRB;KIT;CAT;SOX9;F2R;KDR
positive regulation of cell division (GO:0051781)	18/120	0.0364654	0.421602	-1.23023	1.06254	FGF6;FGF8;PDGFB;UBE2C;MDK;CSPP1;IGF1R;CXCR5;PLK1;VEGFA;PDGFRB;NSMCE2;PDGFC;CAT;FGF1;FGF2;FGF3;LRP5
negative regulation of protein phosphorylation (GO:0001933)	33/260	0.0442564	0.463427	-1.36383	1.04893	ENPP1;IMPACT;SFN;PBLD;GPD1L;IGF1R;PPP1R1B;APOE;PYCARD;SPRED1;PPAP2B;TESC;IL6;SOCS3;MLXIPL;WNK1;CRIPAK;PARK2;PKIA;SLIT2;CAMK2N1;THY1;PPM1E;DUSP2;PLK1;HIPK3;PRNP;GADD45B;CHORDC1;DUSP9;GADD45A;LRP5;CALM1
sensory organ development (GO:0007423)	16/103	0.0367711	0.421602	-1.20519	1.04091	RAX;RARG;RXRA;FZD5;PRDM16;PPP1R13L;GLI3;GRHL2;WT1;CHRDL1;WDPCP;BNC2;VEGFA;STRA6;FOXC1;BMPR1B
digestive system process (GO:0022600)	10/51	0.0275048	0.360018	-1.01319	1.03507	VDR;SLC26A6;LDLR;SLC26A7;ACO1;FABP1;NPR3;SOX9;MUC13;PBLD
negative regulation of hemostasis (GO:1900047)	9/43	0.0258611	0.343617	-0.966093	1.03201	PDGFB;SERPINE2;APOE;KLKB1;SERPINE1;APOH;CYP4F2;PROS1;PLG
negative regulation of blood coagulation (GO:0030195)	9/43	0.0258611	0.343617	-0.961927	1.02756	PDGFB;SERPINE2;APOE;KLKB1;SERPINE1;APOH;CYP4F2;PROS1;PLG
response to wounding (GO:0009611)	23/167	0.0426597	0.45428	-1.2887	1.01684	PPARA;F2RL3;IL6;ACHE;PDGFB;ERBB3;TGFBR1;CCR1;ITGB4;SPARC;DCN;SOD1;GLI3;MDK;NREP;APOD;APOE;HMOX1;PDGFRB;LOX;FGF2;CHL1;F2R
regulation of cell-cell adhesion (GO:0022407)	15/94	0.035362	0.411434	-1.13255	1.00583	ASS1;FOXA2;PODXL;FSTL3;SNAI2;EPHB3;CCL28;PLG;ZNF703;SERPINE2;ITGA6;ANK3;B4GALNT2;HAS2;DPP4
plasma membrane organization (GO:0007009)	18/121	0.0387757	0.427408	-1.16165	0.987423	TESC;MPP5;SOD1;PLEKHF1;EPB41L3;RAB31;KRT18;ANK2;ANK3;AHNAK2;SPTBN1;MAP7;NDRG1;AGRN;SCP2;GOLGA4;ANO6;EHD3
regulation of lipid biosynthetic process (GO:0046890)	17/113	0.0403677	0.436209	-1.1882	0.985773	LDLR;PDGFB;MLXIPL;NR3C1;SOD1;SNAI2;ABCG1;IGF1R;VDR;CYP17A1;NR1D1;APOE;APOC3;FABP3;FGF1;THRSP;NR1H4
hormone metabolic process (GO:0042445)	22/158	0.0426379	0.45428	-1.24054	0.978842	SCPEP1;ALDH8A1;HSD17B11;CRHBP;MME;ANPEP;ENPEP;DDO;IYD;TTR;CYP17A1;DHRS3;REN;ALDH1A3;ACE2;FOXE1;STRA6;DIO1;PCSK5;SCP2;UGT2B7;RETSAT
branching involved in ureteric bud morphogenesis (GO:0001658)	9/44	0.0289398	0.371207	-0.982789	0.973938	TCF21;FGF8;PBX1;SOX9;MYC;GLI3;FGF2;WT1;HOXD11
regulation of cell adhesion mediated by integrin (GO:0033628)	8/36	0.0264993	0.348934	-0.91239	0.96063	LPXN;TESC;PODXL;SERPINE1;PDE3B;SNAI2;DPP4;EPHA2
response to molecule of bacterial origin (GO:0002237)	31/243	0.0474929	0.48017	-1.3057	0.95788	ALPL;ASS1;ADH5;ACP5;SHPK;ABCA1;DCN;GCH1;NR1D1;PTGES;FMO1;REN;SERPINE1;PYCARD;SFTPC;LIAS;NR1H4;IRAK2;PTGER1;IRAK1;IL6;MAOB;SPARC;FZD5;S100A14;CYP17A1;RPS6KA3;PLCG2;MAPK8;CD14;F2R
behavior (GO:0007610)	57/494	0.0479531	0.482603	-1.30547	0.951111	ALS2;PPARA;GPR162;FOXA2;GM2A;FGF14;ADCY8;CRHBP;SYNJ1;OBP2B;CALB1;KLHL1;MCOLN3;SERPINE2;PPP1R1B;ATG7;MAPT;DLG4;VPS13A;STRA6;SEPP1;NQO2;ZFX;GRM1;DDO;RNF180;SERPINF1;ABAT;PRNP;CHL1;KIT;MDK;EPHB2;HOXA1;ALB;REN;ALDH1A3;SCN9A;PPP3CB;APBA2;IL6;GLRB;LRRN4;PCDH15;PARK2;DACH1;ITPR3;SOD1;ANKH;HOMER2;ATP7A;NLGN4Y;HOXB8;GLS;ITGA8;P2RX3;ACE2
response to corticosteroid (GO:0031960)	20/140	0.042229	0.451881	-1.19244	0.947195	ALPL;IL6;ASS1;MAOB;SPARC;NR3C1;CDO1;PCK2;MDK;SLIT2;SLIT3;WNT7B;SERPINF1;HNMT;HEY1;PAPPA;SFTPC;GHR;CALM1;ACVR1
organophosphate biosynthetic process (GO:0090407)	51/436	0.0492224	0.492	-1.32207	0.937712	MOCOS;ASPDH;KYNU;ADCY8;SYNJ1;PIP5K1B;AFMID;AGPAT6;SH3YL1;SLC35D1;AGPAT9;MGLL;FGF2;AGPAT3;PLD1;PI4KA;LPIN2;CHPT1;PNPLA3;CWH43;PANK1;RRM2;PKLR;LCLAT1;UGP2;ACHE;UGDH;NFS1;UPP2;KMO;GCH1;GPD1L;GPHN;PIKFYVE;HAAO;PNPO;ETNK2;PCYT1B;PIK3R1;MOCS1;GPD1;ADSSL1;AK2;AK4;SLC25A13;ADCY9;PLCG2;GFPT2;QPRT;PIP4K2A;SCP2
growth (GO:0040007)	40/329	0.0486196	0.487082	-1.297	0.932964	KDM6A;PDGFB;USP9X;SOX9;GLI3;HOXD11;APOD;NDRG4;MAPT;PPP3CB;ENTPD5;HEG1;APBA2;ETNK2;STRA6;SEPP1;FGF1;DCLK1;ASPM;IL6;AR;RARG;GATM;ZFX;SLC3A2;PCDH15;GRHL2;PPP1R13L;NDNF;SLIT2;SLIT3;WNT7B;G6PC;PRLR;BNC2;VEGFA;TGFBR3;MAP7;ADAM15;IGFBP5
cAMP metabolic process (GO:0046058)	8/35	0.02332	0.324562	-0.810108	0.911597	ADCY9;ADCY8;PDE7A;PDE4A;PDE3B;PDE10A;PDE3A;PDE8A
dopamine metabolic process (GO:0042417)	7/28	0.0228066	0.324562	-0.802244	0.902749	ATP7A;DDC;SNCAIP;MAOB;DAO;PARK2;GCH1
long-chain fatty acid metabolic process (GO:0001676)	14/86	0.0362312	0.420435	-1.03235	0.894491	ACOX1;CYP2C8;EPHX2;PTGIS;PTGES;GPX4;ELOVL2;MGLL;CYP4F3;CYP4F2;SCP2;SLC27A2;HPGD;DPEP1
glycosphingolipid metabolic process (GO:0006687)	11/61	0.0342417	0.403223	-0.957274	0.869458	ARSB;ST6GALNAC3;ARSE;GM2A;ST8SIA6;HEXA;MAP7;CTSA;CERK;KIT;NEU4
glycerophospholipid biosynthetic process (GO:0046474)	24/178	0.0469207	0.475517	-1.15036	0.855123	GPD1;PLD1;ACHE;SYNJ1;PIP5K1B;PI4KA;LPIN2;PNPLA3;CHPT1;GPD1L;CWH43;SH3YL1;AGPAT6;PIKFYVE;AGPAT9;PLCG2;LCLAT1;MGLL;ETNK2;PCYT1B;PIP4K2A;AGPAT3;FGF2;PIK3R1
positive regulation of kidney development (GO:0090184)	8/37	0.0299676	0.374409	-0.868873	0.853587	PDGFB;VEGFA;SERPINB7;PDGFRB;SIX4;SOX9;MYC;WT1
regulation of cartilage development (GO:0061035)	10/54	0.036982	0.421602	-0.96944	0.837299	MAF;FGF18;RARG;TRPS1;TGFBR1;SNAI2;SOX9;FRZB;GLI3;HOXD11
acylglycerol homeostasis (GO:0055090)	7/28	0.0228066	0.324562	-0.731854	0.82354	MIA2;HNF4A;ACSM2A;PLA2G12B;APOC3;MLXIPL;ANGPTL3
cell growth (GO:0016049)	16/106	0.044716	0.466021	-1.07709	0.822385	IL6;AR;RARG;PDGFB;USP9X;SLC3A2;SOX9;NDNF;SLIT2;SLIT3;NDRG4;MAPT;ENTPD5;PPP3CB;TGFBR3;DCLK1
triglyceride homeostasis (GO:0070328)	7/28	0.0228066	0.324562	-0.724089	0.814802	MIA2;HNF4A;ACSM2A;PLA2G12B;APOC3;MLXIPL;ANGPTL3
regulation of blood coagulation (GO:0030193)	13/79	0.0398627	0.431813	-0.960889	0.806918	FOXA2;PDGFB;ASIC2;PLG;SERPINE2;APOE;KLKB1;SERPINE1;APOH;CYP4F2;ANO6;PROS1;F2R
regulation of hemostasis (GO:1900046)	13/79	0.0398627	0.431813	-0.95797	0.804467	FOXA2;PDGFB;ASIC2;PLG;SERPINE2;APOE;KLKB1;SERPINE1;APOH;CYP4F2;ANO6;PROS1;F2R
receptor-mediated endocytosis (GO:0006898)	21/152	0.0497452	0.496098	-1.14701	0.804036	ACHE;CUBN;OLR1;LDLR;ENPP1;ENPP3;SUSD2;TINAG;TMPRSS3;RAB31;DAB2;TFRC;APOE;NEDD4;PIKFYVE;LOXL4;SCARA3;PLA2R1;LRP2;TMPRSS13;GHR
kidney epithelium development (GO:0072073)	11/62	0.0374155	0.421932	-0.926905	0.799836	TCF21;WNT7B;PDGFB;POU3F3;FOXC1;CAT;FGF1;ACAT1;CALB1;SLIT2;WT1
keratan sulfate biosynthetic process (GO:0018146)	7/28	0.0228066	0.324562	-0.68977	0.776184	ST3GAL1;LUM;ST3GAL6;B3GNT3;CHST5;B4GALT4;B4GALT5
negative regulation of phosphorylation (GO:0042326)	39/325	0.0588853	0.526377	-1.2012	0.770856	ENPP1;FOXA2;IMPACT;SFN;PBLD;GPD1L;IGF1R;DNAJC15;PPP1R1B;APOE;PYCARD;SPRED1;MYC;PPAP2B;TESC;IL6;SOCS3;MLXIPL;WNK1;CRIPAK;PARK2;SLC9A3R1;PKIA;CAMK2N1;SLIT2;THY1;ANKRD26;GRB10;PPM1E;DUSP2;PLK1;HIPK3;DUSP9;CHORDC1;PRNP;GADD45B;GADD45A;LRP5;CALM1
cyclic nucleotide catabolic process (GO:0009214)	6/18	0.0117856	0.232657	-0.524246	0.76445	PDE7A;PDE4A;PDE3B;PDE10A;PDE3A;PDE8A
response to drug (GO:0042493)	42/354	0.0587803	0.526377	-1.17966	0.757031	FGF8;PDGFB;ASS1;SLC22A12;CRHBP;ABCA1;MDK;MTHFR;APOD;PLIN2;REN;PDE4A;APOC3;PPP3CB;PMS2;LOX;HADH;MYC;DPEP1;NAT8;DDC;ADSSL1;IL6;MAOB;FBP1;SLC34A1;QDPR;GGH;PDE3A;AK4;CYP2E1;ATR;SOD1;CYP17A1;BLMH;PPM1E;MT2A;FABP3;ABAT;OGG1;ABCC6;NNMT
regulation of wound healing (GO:0061041)	16/107	0.0476162	0.480312	-1.02651	0.752761	FOXA2;PDGFB;TNFRSF12A;ASIC2;CD109;PLG;SERPINE2;APOE;KLKB1;SERPINE1;APOH;CYP4F2;FGF2;ANO6;PROS1;F2R
regulation of hormone levels (GO:0010817)	29/229	0.0575893	0.518753	-1.13523	0.745083	HSD17B11;ALDH8A1;SCPEP1;HNF1A;CRHBP;CAMK2G;MME;ANPEP;ENPEP;TTR;REN;ALDH1A3;TRPV4;STRA6;SLC30A8;PCSK5;IL6;PCLO;DDO;IYD;CYP17A1;DHRS3;FOXE1;ACE2;ABCC2;DIO1;SCP2;UGT2B7;RETSAT
cardiac epithelial to mesenchymal transition (GO:0060317)	6/19	0.014444	0.259284	-0.54565	0.736536	FGF8;HEY1;TGFBR3;HAS2;SNAI2;ADAM15
pyruvate metabolic process (GO:0006090)	12/71	0.0404994	0.436452	-0.849983	0.704701	PDK2;SLC16A1;ADPGK;PFKFB2;OGDHL;ALDOB;PKLR;PCK2;OGDH;DHTKD1;PC;PCK1
nitrogen compound transport (GO:0071705)	53/464	0.0625306	0.548922	-1.13643	0.68163	SLC36A1;SLC36A2;HNF1A;SLC22A13;SLC22A12;SLC16A10;SLC7A8;SLC7A9;SLC7A7;SLC23A1;SLC35D1;COL4A3BP;SLC22A4;TRPV4;SLC22A5;SLC43A2;DDC;SLC22A8;KIF5C;FMR1;SLC3A2;SLC3A1;TCN2;SLC9A3R1;PCLO;RHCG;SLC38A5;SLC38A3;CAMK2G;SLC38A6;ABCA1;FOLR3;SLC29A2;SLC29A4;SLC35B4;SLC30A8;HBB;SLC28A1;IL6;CUBN;SLC6A13;PARK2;SLC6A19;TST;SLC6A9;SLC17A5;SLC25A13;P2RX1;SLC17A3;SLC7A2;GLS;ABCC2;PDZK1
pattern specification process (GO:0007389)	45/385	0.0620824	0.546076	-1.12062	0.677968	IRX3;FGF8;KDM6A;MFNG;FOXA2;IRX2;IRX1;ZEB2;GLI3;DNAH5;WT1;HOXD11;SEMA5A;HOXA1;HEY1;DYNC2H1;SOX17;GALNT11;PCSK5;NFATC3;ALX1;RAX;RARG;GSC;FLT1;FOXJ1;TTC21B;TGFBR1;FZD5;RTTN;MIB1;WNT7B;MEOX2;INVS;HOXB8;DLL4;VEGFA;MNX1;ROR2;FOXC1;HOXB9;PBX1;BMPR1B;LRP5;ACVR1
post-Golgi vesicle-mediated transport (GO:0006892)	14/90	0.0481235	0.483213	-0.915932	0.666156	LAMP1;RAB31;AP1M1;KRT18;STX7;ANK3;SPTBN1;VPS13A;SH3D19;STEAP2;GOLGA4;FTH1;KLHL20;FTL
response to ethanol (GO:0045471)	16/109	0.0538093	0.517584	-0.994408	0.654901	CRHBP;MAOB;GGH;ADH6;CYP2E1;SPARC;CDO1;SOD1;BIRC2;ITPR2;EIF4EBP1;APOE;ABAT;OGG1;CD14;TP53INP1
glycerolipid biosynthetic process (GO:0045017)	26/202	0.0602659	0.534374	-1.01956	0.638919	ACHE;SYNJ1;PIP5K1B;GPD1L;AGPAT6;SH3YL1;AGPAT9;PIKFYVE;ELOVL2;MGLL;ETNK2;PCYT1B;FGF2;AGPAT3;PIK3R1;GPD1;PLD1;PI4KA;LPIN2;CHPT1;PNPLA3;CWH43;PLCE1;PLCG2;LCLAT1;PIP4K2A
cellular response to extracellular stimulus (GO:0031668)	17/119	0.0576785	0.518753	-0.965245	0.633517	WDFY3;PDK2;CYP24A1;FOXA2;CPEB4;RRP8;ATG2B;VDR;DNAJC15;ITGA6;ALB;ATG7;HMOX1;SLC39A5;TNRC6A;NR1H4;HDAC6
regulation of Rho GTPase activity (GO:0032319)	23/174	0.0597665	0.531016	-0.995558	0.630151	ALS2;ARHGEF3;ARHGEF2;ARHGEF38;FOXJ1;RASIP1;ITSN2;ARHGEF9;SOD1;EPHB3;ARHGEF12;EPHA2;FARP2;THY1;RASGRF2;AGRN;BCAS3;DOCK10;SRGAP1;EPS8L1;NET1;SRGAP2;ARHGAP10
embryonic organ development (GO:0048568)	17/119	0.0576785	0.518753	-0.951513	0.624505	SLC8A1;RARG;EPAS1;PDGFB;UTY;TEAD2;KIT;FZD5;SOX9;PPP1R13L;GLI3;KDR;WNT7B;HEY1;PBX1;STRA6;PCSK5
sphingolipid metabolic process (GO:0006665)	18/128	0.0579985	0.520566	-0.947869	0.618806	ARSB;ARSE;GM2A;PPAP2C;HEXA;SPTSSB;CTSA;KIT;ST6GALNAC3;P2RX1;ST8SIA6;SMPDL3A;COL4A3BP;MAP7;CERK;PPAP2B;DEGS2;NEU4
regulation of epithelial cell migration (GO:0010632)	18/129	0.0612038	0.540511	-0.967957	0.595526	PDGFB;SPARC;SOX9;EPHA2;SLIT2;KDR;PBLD;SEMA5A;APOE;DLL4;VEGFA;APOH;TGFBR3;BCAS3;FGF2;ANGPT2;CTSH;HDAC6
regulation of generation of precursor metabolites and energy (GO:0043467)	12/74	0.0510608	0.503424	-0.865963	0.59433	ATP7A;KHK;GPD1;PPARA;DNAJC15;GRB10;ENPP1;C1QTNF2;FBP1;MLXIPL;ENTPD5;PRDM16
negative regulation of coagulation (GO:0050819)	9/47	0.0396937	0.431813	-0.693036	0.581985	PDGFB;SERPINE2;APOE;KLKB1;SERPINE1;APOH;CYP4F2;PROS1;PLG
arachidonic acid metabolic process (GO:0019369)	10/55	0.0405886	0.436452	-0.700451	0.580727	PTGIS;PTGES;CYP2C8;GPX4;EPHX2;MGLL;CYP4F3;CYP4F2;HPGD;DPEP1
chloride transport (GO:0006821)	14/92	0.0549874	0.517584	-0.861092	0.567101	SLC26A4;SLC12A6;SLC12A7;SLC26A6;GLRB;SLC26A7;SLC12A3;CLIC5;ANO1;SLC4A1;PCYOX1;CLCN6;ANO6;ANO10
regulation of cholesterol metabolic process (GO:0090181)	6/20	0.0174922	0.283877	-0.433808	0.546257	APOE;EPHX2;FGF1;SOD1;ABCG1;NR1H4
bile acid metabolic process (GO:0008206)	8/39	0.0378118	0.422701	-0.62959	0.542133	ACOX2;SLCO1A2;CYP27A1;ALB;SLC10A2;SLC27A2;SCP2;NR1H4
inorganic cation transmembrane transport (GO:0098662)	50/440	0.0731804	0.584115	-0.986128	0.530199	SLC36A1;KCNJ15;KCNJ12;KCNK13;KCNK10;CUL5;SLC23A1;MCOLN3;KCNK5;TRPV4;SCN7A;TRPV6;SLC4A4;KCNQ2;ATP6V0D2;SLC12A6;TRPM3;TRPM7;SLC3A2;CYB5A;CNGA1;ATP6V1C2;RHCG;KCNH6;ATP6V1G3;SLC40A1;TRAPPC10;ATP6V1B2;SLC47A1;TPCN1;KCNMB1;SLC30A4;SCN9A;SLC30A8;SLC31A1;MICU1;CACNA2D1;HPN;SLC8A1;SLC12A3;ASIC2;ITPR3;CACNA2D2;KCNV1;ITPR2;ATP7A;P2RX1;SLC17A3;SLC13A1;ATP6V0A1
vitamin transport (GO:0051180)	7/29	0.0263492	0.348	-0.502258	0.53016	SLC23A1;AFM;FOLR3;CUBN;SLC2A2;STRA6;TCN2
pyridine nucleotide biosynthetic process (GO:0019363)	6/20	0.0174922	0.283877	-0.41844	0.526906	ASPDH;KYNU;HAAO;QPRT;KMO;AFMID
O-glycan processing (GO:0016266)	10/56	0.044429	0.46413	-0.66998	0.51427	ST3GAL1;GALNT6;B3GNT3;GALNT11;MUC13;ST6GALNAC2;C1GALT1;GALNT13;MUC12;B4GALT5
positive regulation of Rho GTPase activity (GO:0032321)	20/149	0.0673362	0.570039	-0.904839	0.508565	ALS2;ARHGEF3;ARHGEF2;ARHGEF38;FOXJ1;ITSN2;ARHGEF9;ARHGEF12;EPHA2;FARP2;THY1;RASGRF2;AGRN;BCAS3;DOCK10;SRGAP1;EPS8L1;NET1;SRGAP2;ARHGAP10
vasculogenesis (GO:0001570)	11/67	0.056376	0.517584	-0.761484	0.5015	WNT7B;HEY1;VEGFA;RASIP1;HEG1;HAS2;TEAD2;SOX17;WT1;EPHA2;KDR
reproductive structure development (GO:0048608)	32/265	0.0760931	0.604075	-0.98232	0.495146	TSPY3;FGF8;TSPY1;IRX5;TSPY4;FSTL3;KIT;DCN;SOX9;WT1;TCF21;HEY1;REN;LHX3;IDH1;ETNK2;STRA6;PCYT1B;ZFAT;AR;ZFX;BIRC6;FZD3;FRZB;FZD5;SOD1;BIRC2;RBMY1B;KDR;VEGFA;FOXC1;TFAP2C
nicotinamide nucleotide biosynthetic process (GO:0019359)	6/20	0.0174922	0.283877	-0.388698	0.489455	ASPDH;KYNU;HAAO;QPRT;KMO;AFMID
embryonic morphogenesis (GO:0048598)	46/403	0.0787449	0.609718	-0.977475	0.483614	FGF8;KDM6A;IRX5;UGDH;LRIG3;SOX9;GLI3;HOXD11;EPHB2;OFD1;TCF21;HOXA1;WDPCP;RSPO3;ALDH1A3;DYNC2H1;SOX17;FGF2;PPAP2B;FGF3;ALX1;NAT8B;HPN;RARG;GSC;FLT1;SOCS3;TGFBR1;FZD3;TEAD2;SIX4;FRZB;FZD5;GRHL2;MIB1;WNT7B;HOXB8;DLL4;ITGA8;FOXE1;SPEF2;ROR2;USH1C;PBX1;LRP5;ACVR1
hydrogen peroxide catabolic process (GO:0042744)	6/20	0.0174922	0.283877	-0.376411	0.473982	GPX4;GPX3;HBA1;CAT;HBB;PXDNL
chloride transmembrane transport (GO:1902476)	13/84	0.0570856	0.518753	-0.720679	0.473002	SLC26A4;SLC12A6;SLC12A7;SLC26A6;GLRB;SLC26A7;SLC12A3;CLIC5;ANO1;SLC4A1;PCYOX1;ANO6;ANO10
regulation of transforming growth factor beta receptor signaling pathway (GO:0017015)	15/103	0.0634842	0.552879	-0.79623	0.471859	TGFBR1;CD109;PPM1A;PRDM16;PBLD;NREP;SKOR1;DAB2;ZNF703;TRIM33;HTRA1;LRG1;ITGA8;TGFBR3;SKIL
regulation of small GTPase mediated signal transduction (GO:0051056)	31/256	0.0777801	0.608038	-0.94094	0.468134	ALS2;IQGAP2;ABCA1;RASAL1;APOE;MAPKAP1;APOC3;RHOBTB1;SSX2IP;ARHGAP11A;INPP5B;IQSEC1;NET1;ARHGEF3;ARHGEF2;ARHGAP28;FBP1;DENND1A;ARHGEF9;ARHGEF12;SLIT2;ARHGAP31;PLCE1;ARHGAP32;RASGRF2;GPR56;EPS8L1;SRGAP1;F2R;SRGAP2;ARHGAP10
ameboidal-type cell migration (GO:0001667)	17/123	0.0717276	0.574605	-0.843476	0.467347	FGF8;PHACTR4;TGFBR1;FERMT1;ZEB2;KIT;SLIT2;KDR;TNS1;WDPCP;PKN3;VEGFA;SOX17;FGF2;DPP4;LRP5;ACVR1
regulation of coagulation (GO:0050818)	13/85	0.061052	0.540255	-0.735959	0.453141	FOXA2;PDGFB;ASIC2;PLG;SERPINE2;APOE;KLKB1;SERPINE1;APOH;CYP4F2;ANO6;PROS1;F2R
camera-type eye development (GO:0043010)	10/58	0.052831	0.51405	-0.673483	0.448159	RAX;RARG;WDPCP;RXRA;VEGFA;FOXC1;FZD5;GRHL2;PPP1R13L;WT1
monosaccharide catabolic process (GO:0046365)	8/40	0.0422058	0.451881	-0.562987	0.447201	KHK;AKR1A1;FUT6;PFKFB2;ALDOB;RBKS;LRP5;XYLB
positive regulation of protein serine/threonine kinase activity (GO:0071902)	31/257	0.0805612	0.618339	-0.908949	0.436949	ALS2;PDGFB;C5;EZH2;TNFSF15;IQGAP3;ZEB2;KIT;MAP3K5;DAB2;C1QTNF2;FGF2;GHR;IRAK2;NOX4;IRAK1;FLT1;CHI3L1;ITGA1;MAPK10;SOD1;FZD5;GRM1;PLCE1;WNT7B;CCND3;VEGFA;PDGFRB;GADD45B;GADD45A;CALM1
regulation of smooth muscle cell migration (GO:0014910)	7/31	0.0345185	0.403223	-0.478607	0.434701	NOX4;PDGFB;AIF1;SERPINE1;PDGFRB;SLIT2;IGFBP5
regulation of transmembrane transport (GO:0034762)	38/327	0.0856541	0.628716	-0.914979	0.42462	KCNJ15;PDGFB;CRHBP;KCNJ12;KCNK13;TPCN1;KCNK10;GPD1L;ANK2;ANK3;KCNK5;APOC3;SCN9A;DLG4;SCN7A;KCNQ2;ANO6;GPR89A;GLRX;CACNA2D1;TESC;ASIC2;SLC34A1;SLC9A3R1;CACNA2D2;KCNV1;SLC26A6;RASGRF2;NEDD4;CLIC5;PLCG2;KCNH6;PDGFRB;CA2;PRNP;PDZK1;CASQ2;CALM1
cyclic-nucleotide-mediated signaling (GO:0019935)	7/31	0.0345185	0.403223	-0.465153	0.422482	EIF4EBP2;APOE;PDE3A;SOX9;PDZD3;PCLO;HTR5A
regulation of protein kinase B signaling (GO:0051896)	16/114	0.0716781	0.574605	-0.759751	0.420957	NOX4;IL6;MAGI2;OSBPL8;FAM110C;TGFBR1;CHI3L1;SLC9A3R1;EPHA2;SESN3;SEMA5A;IGF1R;KIAA1161;TXN;VEGFA;IGFBP5
phospholipid metabolic process (GO:0006644)	34/288	0.085966	0.628716	-0.901125	0.418191	ACHE;SYNJ1;PIP5K1B;GPD1L;AGPAT6;SH3YL1;SMPDL3A;GPX4;AGPAT9;PIKFYVE;PLCD4;MGLL;ETNK2;PCYT1B;ANGPTL3;INPP5B;PPAP2B;FGF2;AGPAT3;PIK3R1;IP6K2;GPD1;PLD1;PI4KA;LPIN2;PNPLA3;CHPT1;CWH43;PLCE1;PLCG2;LIPG;PDGFRB;LCLAT1;PIP4K2A
membrane lipid metabolic process (GO:0006643)	21/162	0.0801903	0.616568	-0.845131	0.408694	ARSB;ARSE;GM2A;PPAP2C;HEXA;SPTSSB;CTSA;KIT;CWH43;ST6GALNAC3;P2RX1;ST8SIA6;SMPDL3A;COL4A3BP;ST3GAL6;MAP7;CERK;PPAP2B;B4GALT4;DEGS2;NEU4
positive regulation of transmembrane transport (GO:0034764)	12/77	0.0633534	0.552834	-0.688013	0.407784	SLC26A6;TESC;PDGFB;ANK2;ANK3;PLCG2;SLC34A1;PDGFRB;CA2;PDZK1;GLRX;CALM1
plasma lipoprotein particle organization (GO:0071827)	7/31	0.0345185	0.403223	-0.443175	0.402521	APOE;APOC3;LIPG;ABCA1;APOM;ABCG1;ABCA5
glycerophospholipid metabolic process (GO:0006650)	28/229	0.0829641	0.628716	-0.856226	0.397354	ACHE;SYNJ1;PIP5K1B;GPD1L;AGPAT6;SH3YL1;AGPAT9;PIKFYVE;PLCD4;MGLL;ETNK2;PCYT1B;INPP5B;FGF2;AGPAT3;PIK3R1;IP6K2;GPD1;PLD1;PI4KA;LPIN2;CHPT1;PNPLA3;CWH43;PLCG2;PDGFRB;LCLAT1;PIP4K2A
protein localization to plasma membrane (GO:0072659)	12/77	0.0633534	0.552834	-0.656731	0.389243	PLEKHF1;EPB41L3;RAB31;TESC;KRT18;ANK2;ANK3;SPTBN1;MAP7;GOLGA4;SCP2;EHD3
phosphatidic acid metabolic process (GO:0046473)	7/31	0.0345185	0.403223	-0.427954	0.388695	GPD1L;GPD1;AGPAT6;PLD1;AGPAT9;LCLAT1;AGPAT3
phosphatidic acid biosynthetic process (GO:0006654)	7/31	0.0345185	0.403223	-0.421474	0.38281	GPD1L;GPD1;AGPAT6;PLD1;AGPAT9;LCLAT1;AGPAT3
regulation of Rho protein signal transduction (GO:0035023)	7/31	0.0345185	0.403223	-0.412493	0.374653	ARHGEF2;APOE;APOC3;GPR56;ABCA1;EPS8L1;F2R
positive regulation of mitosis (GO:0045840)	8/42	0.0519747	0.50684	-0.544389	0.369945	IGF1R;FGF8;PDGFB;PLK1;PDGFRB;NSMCE2;UBE2C;LRP5
negative regulation of kinase activity (GO:0033673)	25/202	0.0882669	0.628716	-0.794057	0.368503	TESC;IL6;FOXA2;SOCS3;WNK1;CRIPAK;PARK2;SFN;PKIA;CAMK2N1;THY1;IGF1R;PPM1E;DUSP2;PPP1R1B;PLK1;APOE;HIPK3;PYCARD;SPRED1;DUSP9;CHORDC1;GADD45B;GADD45A;LRP5
cellular response to peptide hormone stimulus (GO:0071375)	31/261	0.0923637	0.637701	-0.811004	0.36486	FGF6;FGF18;FGF8;ASS1;ENPP1;ADCY8;CRHBP;PPM1A;PDE3B;ATP6V1B2;IGF1R;EIF4EBP1;EIF4EBP2;FGF1;ATP6V0D2;FGF2;PIK3R1;FGF3;GHR;PDK2;KL;STRADB;ATP6V1D;ATP6V1C2;RAB31;GRB10;ADCY9;PKLR;ATP6V0A1;ATP6V1G3;THEM4
positive regulation of protein kinase B signaling (GO:0051897)	12/78	0.0678491	0.570039	-0.646055	0.363116	NOX4;SEMA5A;IGF1R;KIAA1161;IL6;OSBPL8;FAM110C;TGFBR1;TXN;VEGFA;CHI3L1;IGFBP5
cellular response to fibroblast growth factor stimulus (GO:0044344)	23/183	0.0881738	0.628716	-0.780549	0.362234	FGF6;FGF18;FGF8;PDGFB;ADCY8;FGF14;KL;ERBB3;KIT;ITPR3;SNAI2;ITPR2;ADCY9;MAPKAP1;DLL4;PDGFRB;FGF1;THEM4;FGF2;TNRC6A;PIK3R1;FGF3;CALM1
negative regulation of cell-cell adhesion (GO:0022408)	8/41	0.0469246	0.475517	-0.484369	0.360057	ZNF703;ASS1;SERPINE2;PODXL;B4GALNT2;SNAI2;CCL28;PLG
locomotory behavior (GO:0007626)	23/183	0.0881738	0.628716	-0.772181	0.358351	ALS2;GLRB;FOXA2;FGF14;PCDH15;PARK2;SOD1;ANKH;CALB1;GRM1;KLHL1;ATP7A;MCOLN3;HOXB8;MAPT;ALDH1A3;ATG7;DLG4;ABAT;APBA2;VPS13A;SEPP1;CHL1
cellular ketone metabolic process (GO:0042180)	10/59	0.0574013	0.518753	-0.545805	0.358227	AADAT;CYP17A1;KYNU;CYP2B6;CBR4;KMO;CYP4F2;PDSS1;SCP2;AFMID
negative regulation of neuron death (GO:1901215)	20/155	0.088856	0.628716	-0.770538	0.357588	PPARA;FGF8;IL6;ERBB3;CPEB4;LGMN;PM20D1;PARK2;SIX4;SOD1;MDK;NDNF;ATP7A;CLCF1;APOE;HMOX1;VEGFA;CHL1;GHR;F2R
response to monosaccharide (GO:0034284)	16/116	0.079815	0.61479	-0.733485	0.356822	NOX4;PFKFB2;SLC37A4;MLXIPL;GRIK5;SPARC;PCK2;SLC26A6;HNF4A;PKLR;APOC3;SFTPC;SLC30A8;APOM;ANGPT2;NR1H4
negative regulation of growth (GO:0045926)	27/221	0.0879264	0.628716	-0.75995	0.352675	ENPP1;LGMN;WT1;SEMA5A;SERPINE2;MT1E;SPG20;SOX17;MT1B;MT1H;ING1;MT1G;IP6K2;MT1F;MT1L;CDHR2;FBP1;FRZB;SLIT2;MT1X;CAPRIN2;SLIT3;ANKRD26;HNF4A;MT2A;EAF2;ADAM15
phosphatidylinositol-mediated signaling (GO:0048015)	18/136	0.0870701	0.628716	-0.73131	0.339383	FGF6;FGF18;FGF8;PDGFB;KL;ERBB3;PI4KA;NPR3;KIT;IGF1R;MAPKAP1;PDGFRB;FGF1;THEM4;FGF2;TNRC6A;PIK3R1;FGF3
signal transduction by phosphorylation (GO:0023014)	25/202	0.0882669	0.628716	-0.724668	0.336301	FGF8;FGF14;IQGAP3;KIT;SOX9;MAP3K5;RASGRP3;MYC;IRAK2;IRAK1;TGFBR1;MAPK10;STRADB;KDR;RPS6KA3;SH2D3A;MAP3K15;MAPK4;ROR2;MAPK8;BMPR1B;DUSP9;CTSH;MAP3K13;ACVR1
negative regulation of transmembrane receptor protein serine/threonine kinase signaling pathway (GO:0090101)	15/107	0.0798193	0.61479	-0.678209	0.329931	MAGI2;TGFBR1;PPM1A;FSTL3;CD109;PRDM16;PBLD;SKOR1;CHRDL1;TRIM33;HTRA1;SPG20;TGFBR3;SKIL;ACVR1
modified amino acid transport (GO:0072337)	6/21	0.0209541	0.309921	-0.27541	0.322625	FOLR3;SLC22A8;SLC7A9;ABCC2;SLC3A1;SLC9A3R1
cellular response to alcohol (GO:0097306)	11/70	0.0703656	0.571745	-0.564923	0.315828	VDR;CYP24A1;ZNF703;ASS1;SSTR1;APOE;CRHBP;RORC;ABCA1;TP53INP1;ITPR2
single-organism behavior (GO:0044708)	41/362	0.100076	0.644875	-0.719155	0.315492	ALS2;PPARA;GPR162;FOXA2;GM2A;ADCY8;FGF14;CRHBP;SYNJ1;OBP2B;KIT;MDK;CALB1;KLHL1;EPHB2;HOXA1;SERPINE2;PPP1R1B;MAPT;ATG7;PPP3CB;DLG4;SCN9A;STRA6;NQO2;GLRB;LRRN4;PCDH15;PARK2;ITPR3;HOMER2;DDO;RNF180;NLGN4Y;SERPINF1;HOXB8;P2RX3;ITGA8;ABAT;PRNP;CHL1
cholesterol metabolic process (GO:0008203)	15/107	0.0798193	0.61479	-0.642019	0.312326	ACAA2;CUBN;LDLR;RXRA;PCTP;ABCA1;ABCG1;NPC2;CYP27A1;APOE;OSBPL1A;APOC3;CAT;ANGPTL3;LRP5
regulation of cell growth (GO:0001558)	37/322	0.0990286	0.644875	-0.704997	0.309281	ENPP1;TNFRSF12A;SPOCK1;SFN;WT1;SEMA5A;SERPINE2;WISP3;APOE;HTRA1;MAPT;SPG20;SOX17;ING1;MUC12;NET1;ISLR2;IP6K2;HPN;SGK3;TGFBR1;CDHR2;FBP1;FRZB;CHPT1;SLIT2;SLIT3;CAPRIN2;PLCE1;RPS6KA3;TFRC;HNF4A;VEGFA;EAF2;IGFBP4;IGFBP5;ADAM15
eye development (GO:0001654)	12/79	0.0725475	0.580116	-0.567421	0.308976	RAX;RARG;CHRDL1;WDPCP;RXRA;VEGFA;FOXC1;BMPR1B;FZD5;GRHL2;PPP1R13L;WT1
negative regulation of vasculature development (GO:1901343)	11/70	0.0703656	0.571745	-0.526823	0.294527	SERPINF1;KLK3;DLL4;SULF1;SERPINE1;APOH;PDE3B;BAI3;SPARC;ANGPT2;WT1
response to heat (GO:0009408)	11/70	0.0703656	0.571745	-0.523894	0.29289	IL6;MKI67;TFEC;P2RX3;PKLR;TRPV4;ABCC2;FGF1;SOD1;CD14;TP53INP1
cell morphogenesis (GO:0000902)	25/204	0.0952512	0.644875	-0.662461	0.29062	FGF8;SOX9;EPHB3;WT1;VDR;DAB2;WDPCP;HEY1;COL4A3BP;HEG1;SOX17;MICALL2;NOX4;ARHGEF2;TGFBR1;STRADB;SNAI2;PTPRO;EPHA2;ITGA8;TGFBR3;HAS2;MAP7;ADAM15;SRGAP2
sulfur amino acid biosynthetic process (GO:0000097)	6/21	0.0209541	0.309921	-0.243975	0.285802	ADI1;BHMT2;MTHFR;BHMT;CDO1;CBS
response to fibroblast growth factor (GO:0071774)	23/187	0.103261	0.644875	-0.634503	0.278355	FGF6;FGF18;FGF8;PDGFB;ADCY8;FGF14;KL;ERBB3;KIT;ITPR3;SNAI2;ITPR2;ADCY9;MAPKAP1;DLL4;PDGFRB;FGF1;THEM4;FGF2;TNRC6A;PIK3R1;FGF3;CALM1
negative regulation of response to wounding (GO:1903035)	18/138	0.0955925	0.644875	-0.622007	0.272873	PDGFB;CD109;ACP5;PLG;PSMB4;PTGIS;UACA;APOD;SERPINF1;SERPINE2;APOE;KLKB1;SERPINE1;APOH;CYP4F2;PROS1;FGF2;NT5E
response to acid chemical (GO:0001101)	32/275	0.105932	0.652503	-0.638456	0.272582	ASS1;PDGFB;CPEB4;ABCA1;SOX9;MTHFR;PTGES;APOE;SFTPC;SLC22A6;PDGFC;HMGCL;NR1H4;TESC;IL6;RARG;RXRA;SLC22A8;ASIC2;CYP2E1;SPARC;CDO1;CYP17A1;WNT7B;SERPINF1;FABP3;PDGFRB;TGFBR3;MAP7;ABCC2;OGG1;CTSH
negative regulation of neuron differentiation (GO:0045665)	19/147	0.0942619	0.644734	-0.616004	0.270375	IRX3;FOXA2;DTX1;SPOCK1;SOX9;GLI3;MEIS1;PTPRO;SLIT2;RUFY3;THY1;EPHB2;SEMA5A;MIB1;APOE;SPG20;TRPV4;PBX1;ASPM
positive regulation of lipid biosynthetic process (GO:0046889)	9/52	0.0630825	0.552663	-0.449163	0.266357	IGF1R;CYP17A1;NR1D1;LDLR;APOE;MLXIPL;FABP3;FGF1;ABCG1
negative regulation of carbohydrate metabolic process (GO:0045912)	8/43	0.0573613	0.518753	-0.400743	0.263019	PPARA;GRB10;IL6;ENPP1;FOXA2;MGEA5;FBP1;PARK2
transferrin transport (GO:0033572)	7/33	0.0442114	0.463427	-0.341728	0.262825	ATP6V1C2;TFRC;ATP6V0A1;ATP6V1G3;ATP6V1B2;ATP6V1D;ATP6V0D2
regulation of cell-substrate adhesion (GO:0010810)	19/149	0.102913	0.644875	-0.593696	0.260453	SPOCK2;SPOCK1;CCL28;PTPRO;NDNF;PLG;KDR;DAB2;WDPCP;APOD;ITGA6;FBLN2;VEGFA;SERPINE1;BCAS3;ANGPT2;PIK3R1;ADAM15;NET1
fat-soluble vitamin metabolic process (GO:0006775)	7/32	0.0391694	0.429298	-0.306602	0.259264	CYP24A1;CUBN;CYP27A1;LGMN;CYP4F2;LRP2;PLTP
regulation of Ras protein signal transduction (GO:0046578)	15/109	0.088922	0.628716	-0.52188	0.242192	ALS2;ARHGEF2;FBP1;DENND1A;ABCA1;RASAL1;PLCE1;APOE;MAPKAP1;GPR56;APOC3;SSX2IP;IQSEC1;EPS8L1;F2R
regulation of cell projection assembly (GO:0060491)	16/120	0.0978327	0.644875	-0.548445	0.240602	GPR162;FAM110C;TGFBR1;PODXL;KIT;TBC1D19;EPHA2;SLIT2;SH3YL1;PPP1R16B;CDC42EP1;WDPCP;TBC1D14;AGRN;BCAS3;EPS8L1
cellular response to cAMP (GO:0071320)	8/43	0.0573613	0.518753	-0.364383	0.239155	NOX4;GPD1;SLC26A6;ASS1;CRHBP;WT1;ITPR2;IGFBP5
positive regulation of MAPK cascade (GO:0043410)	44/395	0.108592	0.663272	-0.581348	0.238684	FGF18;PDGFB;CYSLTR2;CCR1;C5;EZH2;IQGAP3;ZEB2;CDH2;KIT;IL11;IGF1R;DAB2;MAP3K5;C1QTNF2;PYCARD;FGF2;GHR;IRAK2;NOX4;IRAK1;IL6;TNIK;FLT1;KL;TGFBR1;ITGA1;CHI3L1;EDA2R;MAPK10;SOD1;FZD5;GRM1;KDR;PLCE1;WNT7B;MAP3K15;VEGFA;PDGFRB;GADD45B;MAP3K13;GADD45A;IGFBP4;F2R
protein-lipid complex subunit organization (GO:0071825)	7/33	0.0442114	0.463427	-0.302063	0.232319	APOE;APOC3;LIPG;ABCA1;APOM;ABCG1;ABCA5
sterol metabolic process (GO:0016125)	16/119	0.0931086	0.641837	-0.523418	0.232095	ACAA2;CUBN;LDLR;RXRA;PCTP;ABCA1;ABCG1;CYP17A1;NPC2;CYP27A1;APOE;OSBPL1A;APOC3;CAT;ANGPTL3;LRP5
liposaccharide metabolic process (GO:1903509)	14/100	0.0890036	0.628716	-0.478431	0.222028	ARSB;ARSE;GM2A;HEXA;CTSA;KIT;CERCAM;CWH43;ST6GALNAC3;ST8SIA6;ST3GAL6;MAP7;CERK;NEU4
unsaturated fatty acid metabolic process (GO:0033559)	14/100	0.0890036	0.628716	-0.466893	0.216674	ACOX1;CYP2C8;EPHX2;PTGIS;PTGES;GPX4;ELOVL2;MGLL;CYP4F3;CYP4F2;SCP2;HPGD;DPEP1;MGST2
regionalization (GO:0003002)	29/247	0.110715	0.666105	-0.533217	0.21665	FGF8;FOXA2;IRX2;IRX1;ZEB2;GLI3;WT1;HOXD11;HOXA1;DYNC2H1;SOX17;PCSK5;ALX1;RARG;GSC;TTC21B;FOXJ1;TGFBR1;MIB1;WNT7B;INVS;HOXB8;MNX1;ROR2;PBX1;HOXB9;FOXC1;BMPR1B;LRP5
cellular component morphogenesis (GO:0032989)	48/437	0.1135	0.677306	-0.547313	0.213251	ALS2;FGF8;S100A6;ULK4;EPHB3;SOX9;WT1;EPHB2;OFD1;VDR;IGF1R;DAB2;WDPCP;HEY1;ANK3;COL4A3BP;ATG7;DLG4;HEG1;SOX17;GALNT11;TSKU;DCLK1;NOX4;MICALL2;ARHGEF2;FOXJ1;TGFBR1;ZSWIM6;NTNG1;STRADB;SNAI2;FRZB;FZD5;PTPRO;EPHA2;ATP7A;EPB41L3;WNT7B;MAP1S;ITGA8;CC2D2A;TGFBR3;MAP7;HAS2;CDH11;SRGAP2;ADAM15
positive regulation of MAP kinase activity (GO:0043406)	24/197	0.104919	0.648026	-0.477629	0.207207	IRAK2;NOX4;IRAK1;FLT1;PDGFB;C5;EZH2;ITGA1;IQGAP3;ZEB2;KIT;MAPK10;SOD1;FZD5;GRM1;PLCE1;DAB2;MAP3K5;WNT7B;VEGFA;C1QTNF2;PDGFRB;FGF2;GHR
energy derivation by oxidation of organic compounds (GO:0015980)	24/198	0.10887	0.663272	-0.483989	0.198712	FASTKD2;ACADM;ADCY8;KL;PHKA1;SLC37A4;MLXIPL;ITPR3;CACNA2D2;MTFR1;ITPR2;G6PC;SLC25A13;ADCY9;NR1D1;SLC2A2;GFPT2;PKLR;CAT;MYC;NFATC3;UGP2;GPR116;CALM1
response to hexose (GO:0009746)	15/111	0.0986565	0.644875	-0.451539	0.198089	NOX4;PFKFB2;SLC37A4;MLXIPL;GRIK5;PCK2;SLC26A6;HNF4A;PKLR;APOC3;SFTPC;SLC30A8;APOM;ANGPT2;NR1H4
embryonic organ morphogenesis (GO:0048562)	16/121	0.102704	0.644875	-0.448226	0.196636	KDM6A;RARG;IRX5;GSC;TGFBR1;SIX4;GRHL2;GLI3;HOXD11;TCF21;HOXB8;ALDH1A3;FOXE1;ROR2;LRP5;ALX1
dephosphorylation (GO:0016311)	32/278	0.116187	0.691357	-0.516269	0.190554	VPS29;ALPL;PPP2R3B;CDC14A;CAMK2G;PFKFB2;SYNJ1;PPM1A;ACP5;ALPP;PSPH;PTPLA;PPP3CB;INPP5B;PPAP2B;NT5E;MINPP1;PTPRD;PPAP2C;PDXP;EPHX2;SMEK2;FBP1;LPIN2;PTPRO;MTMR11;G6PC;RPAP2;DUSP2;PPM1E;THNSL2;DUSP9
regulation of insulin secretion (GO:0050796)	21/169	0.107679	0.661674	-0.452083	0.186702	FOXA2;GLUD1;BLK;PFKFB2;PDE3B;PARK2;ITPR3;PCK2;CACNA2D2;ITPR2;SLC16A1;HNF4A;NR1D1;SLC2A2;SYBU;MGEA5;PPP3CB;SYTL4;SLC30A8;HADH;LRP5
plasma lipoprotein particle remodeling (GO:0034369)	6/23	0.0292037	0.371207	-0.186837	0.185154	APOE;APOC3;LIPG;APOM;ABCG1;ABCA5
regulation of endothelial cell migration (GO:0010594)	13/92	0.0939497	0.6436	-0.401786	0.177058	SEMA5A;PDGFB;APOE;DLL4;VEGFA;APOH;SPARC;BCAS3;ANGPT2;FGF2;SLIT2;EPHA2;KDR
response to interleukin-6 (GO:0070741)	6/22	0.0248514	0.335266	-0.157317	0.171921	IL6;PTGIS;FOXA2;ST3GAL6;CHI3L1;SFTPC
cell junction organization (GO:0034330)	23/189	0.111386	0.667408	-0.424845	0.171788	MICALL2;PARD6A;MTSS1;CLDN9;TLN2;MPP5;ITGB4;CDH2;SNAI2;PTPRO;CLDN14;THY1;EPB41L3;PVRL4;ZNF703;TNS1;ITGA6;ANK2;PLEKHA7;HEG1;TRPV4;LAMC2;CDH11
protein-lipid complex remodeling (GO:0034368)	6/23	0.0292037	0.371207	-0.172132	0.170581	APOE;APOC3;LIPG;APOM;ABCG1;ABCA5
cell differentiation involved in kidney development (GO:0061005)	6/24	0.0340277	0.403223	-0.187059	0.169899	MTSS1;TCF21;POU3F3;GLI3;PTPRO;WT1
inositol phosphate metabolic process (GO:0043647)	9/53	0.0686244	0.571745	-0.30269	0.169222	MINPP1;PLCE1;SYNJ1;PLCG2;INPP5B;FGF2;SCP2;CALM1;IP6K2
positive regulation of cell migration (GO:0030335)	32/280	0.123363	0.697365	-0.452496	0.1631	PDGFB;AIF1;CCR1;FAM110C;KIT;SOX9;SEMA5A;IGF1R;DAB2;ZNF703;SERPINE1;PYCARD;FGF1;ANGPTL3;BCAS3;FGF2;PIK3R1;NOX4;IL6;FLT1;PODXL;SPARC;SNAI2;S100A14;KDR;VEGFA;PDGFRB;ROR2;HAS2;CTSH;HDAC6;F2R
patterning of blood vessels (GO:0001569)	7/35	0.0554994	0.517584	-0.246317	0.162221	SEMA5A;FGF8;FLT1;DLL4;VEGFA;NFATC3;ACVR1
glycolipid metabolic process (GO:0006664)	13/92	0.0939497	0.6436	-0.365232	0.16095	ARSB;CWH43;ST6GALNAC3;ARSE;GM2A;ST8SIA6;HEXA;ST3GAL6;MAP7;CTSA;CERK;KIT;NEU4
macromolecular complex remodeling (GO:0034367)	6/23	0.0292037	0.371207	-0.158352	0.156926	APOE;APOC3;LIPG;APOM;ABCG1;ABCA5
regulation of lipase activity (GO:0060191)	16/122	0.107721	0.661674	-0.364831	0.150669	MAGI2;FLT1;ADCY8;ITGA1;KIT;ITPR3;ITPR2;ADCY9;APOC3;CMYA5;APOH;PDGFRB;PLA2R1;ANGPTL3;FGF2;CALM1
regulation of cell projection organization (GO:0031344)	43/391	0.126634	0.706775	-0.407974	0.141585	ACHE;GPR162;TNFRSF12A;FAM110C;SPOCK1;ULK4;KIT;EPHB3;TBC1D19;EPHB2;SEMA5A;SH3YL1;PPP1R16B;CDC42EP1;WDPCP;APOE;MAPT;TBC1D14;SPG20;TRPV4;AGRN;SKIL;BCAS3;ISLR2;PTPRD;CCDC88A;MAGI2;TNIK;TGFBR1;PODXL;PTPRO;NDNF;SLIT2;EPHA2;RUFY3;THY1;CAPRIN2;NEDD4;VEGFA;CUX1;DBN1;EPS8L1;FEZ1
protein polymerization (GO:0051258)	10/64	0.084068	0.628716	-0.301363	0.139856	MICALL2;MTSS1;AIF1;TUBAL3;TUBB6;TRPV4;TUBA3E;UBE2C;CASQ2;MSRB2
negative regulation of angiogenesis (GO:0016525)	10/64	0.084068	0.628716	-0.280096	0.129986	SERPINF1;KLK3;DLL4;SULF1;SERPINE1;APOH;PDE3B;BAI3;SPARC;ANGPT2
positive regulation of Ras GTPase activity (GO:0032320)	33/292	0.131001	0.722482	-0.389914	0.126747	ALS2;EZH2;IQGAP3;IQGAP2;ITSN2;DENND2A;TBC1D19;RGL1;RASAL1;RASGRP3;TBC1D14;AGRN;BCAS3;DOCK10;DENND5B;NET1;ARHGEF3;ARHGEF2;ARHGEF38;FOXJ1;DENND1A;ARHGEF9;ARHGEF12;EPHA2;FARP2;THY1;RASGRF2;RIN2;DENND3;EPS8L1;SRGAP1;SRGAP2;ARHGAP10
in utero embryonic development (GO:0001701)	26/222	0.127674	0.710042	-0.340496	0.116596	MTSS1;KDM6A;FOXA2;UTY;USP9X;C5;GLI3;DAB2;COL4A3BP;APBA2;HEG1;ETNK2;INPP5B;MAFF;TGFBR1;RXRA;MBD3;GRHL2;SLIT2;ATP7A;MIB1;WNT7B;VEGFA;PDGFRB;FOXC1;ACVR1
regulation of endopeptidase activity (GO:0052548)	39/354	0.137725	0.733379	-0.36678	0.113736	SH3RF1;C5;TNFSF15;CD109;SOX7;SPOCK1;RPS27L;SFN;MAP3K5;SERPINE2;SERPINA6;SERPINA5;SERPINA4;SERPINE1;PYCARD;HSPE1;MYC;DPEP1;CR1;IL6;C4A;AIFM1;BIRC6;SERPINI1;BCL2L13;BIRC2;RPS6KA3;UACA;P2RX1;SERPINF1;CPAMD8;VEGFA;SERPINB7;SLPI;FABP1;HSPD1;PROS1;CTSH;F2R
protein maturation (GO:0051604)	26/222	0.127674	0.710042	-0.324196	0.111015	TNFSF15;VPS37B;MME;ANPEP;RPS27L;ENPEP;GLI3;MAP3K5;TSPAN33;REN;KLKB1;PYCARD;DYNC2H1;APOH;HSPE1;PCSK5;TESC;AIFM1;TSPAN15;BCL2L13;P2RX1;CTSE;ACE2;HSPD1;CTSH;F2R
positive regulation of locomotion (GO:0040017)	34/304	0.138582	0.733379	-0.353574	0.109641	PDGFB;AIF1;CCR1;FAM110C;C5;KIT;SOX9;SEMA5A;IGF1R;DAB2;ZNF703;SERPINE1;PYCARD;FGF1;ANGPTL3;BCAS3;FGF2;PIK3R1;NOX4;IL6;FLT1;PODXL;SPARC;SNAI2;S100A14;SLIT2;KDR;VEGFA;PDGFRB;ROR2;HAS2;CTSH;HDAC6;F2R
developmental growth (GO:0048589)	20/163	0.12385	0.698781	-0.288221	0.103304	RARG;GATM;USP9X;SOX9;GLI3;SLIT2;HOXD11;SLIT3;WNT7B;APOD;PRLR;MAPT;BNC2;PPP3CB;STRA6;FGF1;ASPM;DCLK1;IGFBP5;ADAM15
positive regulation of protein kinase activity (GO:0045860)	49/456	0.139495	0.733379	-0.328191	0.10177	ALS2;PDGFB;ADCY8;EZH2;TNFSF15;IQGAP3;ZEB2;PDIA5;MAP3K5;DAB2;DDX11;TPP1;PDGFC;FGF2;GHR;IRAK2;IRAK1;TNIK;CCDC88A;GRM1;PLCE1;MAP3K15;CCND3;VEGFA;TXN;PDGFRB;GADD45B;GADD45A;MAP3K13;ERBB3;C5;KIT;C1QTNF2;NOX4;FLT1;TGFBR1;CHI3L1;ITGA1;MAPK10;STRADB;FZD5;SOD1;WIPI1;WNT7B;PRLR;ADCY9;GOSR2;CALM1;F2R
response to vitamin (GO:0033273)	11/75	0.0982386	0.644875	-0.195692	0.0858496	ALPL;VDR;IGF1R;CYP24A1;MTHFR;KYNU;SLC34A1;SFTPC;SPARC;CAT;OGG1
regulation of axonogenesis (GO:0050770)	15/114	0.114446	0.682021	-0.209648	0.0802313	ACHE;TNFRSF12A;EPHB3;PTPRO;SLIT2;RUFY3;EPHB2;THY1;SEMA5A;APOE;MAPT;VEGFA;SPG20;SKIL;ISLR2
calcium ion transport (GO:0006816)	25/215	0.139976	0.733379	-0.251667	0.0780399	CACHD1;CCR1;CAMK2G;TPCN1;ANXA6;VDR;CUL5;ANK2;MCOLN3;BHLHA15;TRPV4;TRPV6;FGF2;MICU1;TRPM3;CACNA2D1;SLC8A1;TRPM7;SLC3A2;ITPR3;CACNA2D2;ITPR2;P2RX1;PLCG2;F2R
positive regulation of cellular component movement (GO:0051272)	33/296	0.146434	0.74675	-0.253904	0.0741463	PDGFB;AIF1;CCR1;FAM110C;KIT;SOX9;SEMA5A;IGF1R;DAB2;ZNF703;SERPINE1;PYCARD;FGF1;ANGPTL3;BCAS3;FGF2;PIK3R1;NOX4;IL6;FLT1;PODXL;TGFBR1;SPARC;SNAI2;S100A14;KDR;VEGFA;PDGFRB;ROR2;HAS2;CTSH;HDAC6;F2R
negative regulation of phosphate metabolic process (GO:0045936)	49/458	0.145805	0.74675	-0.251933	0.0735708	PDGFB;ENPP1;FOXA2;IMPACT;SFN;PBLD;GPD1L;IGF1R;DNAJC15;PPP1R1B;APOE;PYCARD;LMTK3;SPRED1;BCAS3;MYC;PPAP2B;DLG2;PPP1R36;TESC;HPN;IL6;SOCS3;PCDH11X;MLXIPL;WNK1;CRIPAK;PARK2;NPR3;SLC9A3R1;PKIA;CAMK2N1;SLIT2;THY1;ANKRD26;GRB10;PPM1E;DUSP2;PLK1;HIPK3;CMYA5;DUSP9;CHORDC1;PRNP;GADD45B;PDZD3;GADD45A;LRP5;CALM1
negative regulation of phosphorus metabolic process (GO:0010563)	49/458	0.145805	0.74675	-0.249383	0.0728261	PDGFB;ENPP1;FOXA2;IMPACT;SFN;PBLD;GPD1L;IGF1R;DNAJC15;PPP1R1B;APOE;PYCARD;LMTK3;SPRED1;BCAS3;MYC;PPAP2B;DLG2;PPP1R36;TESC;HPN;IL6;SOCS3;PCDH11X;MLXIPL;WNK1;CRIPAK;PARK2;NPR3;SLC9A3R1;PKIA;CAMK2N1;SLIT2;THY1;ANKRD26;GRB10;PPM1E;DUSP2;PLK1;HIPK3;CMYA5;DUSP9;CHORDC1;PRNP;GADD45B;PDZD3;GADD45A;LRP5;CALM1
glutamate metabolic process (GO:0006536)	6/24	0.0340277	0.403223	-0.0750121	0.0681308	AADAT;AMDHD1;GLUD1;GLS;PRODH2;ALDH4A1
regulation of behavior (GO:0050795)	20/166	0.13884	0.733379	-0.21624	0.0670545	IL6;PDGFB;AIF1;CCR1;C5;MDK;S100A14;PTPRO;SLIT2;KDR;SEMA5A;ANKRD26;HOXA1;ALB;VEGFA;SERPINE1;DLG4;PDGFRB;STRA6;ANGPT2
response to estrogen (GO:0043627)	20/166	0.13884	0.733379	-0.212243	0.0658148	ARSB;PDGFB;ASS1;CRHBP;SLC34A1;CRIPAK;GLI3;UGT3A2;ZNF703;SSTR1;HMOX1;SLC25A36;GPX4;PDGFRB;CA2;ABCC2;OGG1;BCAS3;HTR5A;GHR
drug transport (GO:0015893)	6/23	0.0292037	0.371207	-0.0651578	0.064571	SLC17A3;ABCC2;SLC22A5;SLC47A1;PDZK1;SLC47A2
negative regulation of cellular carbohydrate metabolic process (GO:0010677)	7/36	0.0617565	0.544299	-0.104444	0.0635287	PPARA;GRB10;IL6;ENPP1;FOXA2;FBP1;PARK2
positive regulation of ion transport (GO:0043270)	22/186	0.141756	0.733379	-0.198948	0.0616921	F2RL3;TESC;PDGFB;FGF14;CCR1;SLC34A1;THY1;GPD1L;P2RX1;ANK2;ANK3;APOE;P2RX3;PLCG2;MGEA5;PDGFRB;CYP4F2;PLA2R1;PDZK1;F2R;GLRX;CALM1
benzene-containing compound metabolic process (GO:0042537)	6/23	0.0292037	0.371207	-0.0613409	0.0607885	AADAT;CYP17A1;KYNU;HAAO;KMO;AFMID
negative regulation of Wnt signaling pathway (GO:0030178)	16/126	0.129254	0.717753	-0.18058	0.0598859	GSC;CDH2;TLE2;APCDD1;SNAI2;FRZB;SOX9;PTPRO;GLI3;DAB2;GRB10;INVS;NXN;ROR2;SOX17;TSKU
glutamine metabolic process (GO:0006541)	6/23	0.0292037	0.371207	-0.0580211	0.0574986	ADSSL1;NIT2;GLUD1;GLS;GFPT2;GGH
positive regulation of cell motility (GO:2000147)	32/287	0.150601	0.755238	-0.194421	0.0545783	PDGFB;AIF1;CCR1;FAM110C;KIT;SOX9;SEMA5A;IGF1R;DAB2;ZNF703;SERPINE1;PYCARD;FGF1;ANGPTL3;BCAS3;FGF2;PIK3R1;NOX4;IL6;FLT1;PODXL;SPARC;SNAI2;S100A14;KDR;VEGFA;PDGFRB;ROR2;HAS2;CTSH;HDAC6;F2R
negative regulation of blood vessel morphogenesis (GO:2000181)	10/66	0.0965423	0.644875	-0.105159	0.0461331	SERPINF1;KLK3;DLL4;SULF1;SERPINE1;APOH;PDE3B;BAI3;SPARC;ANGPT2
neurotrophin signaling pathway (GO:0038179)	31/278	0.154915	0.76297	-0.144741	0.0391579	FGF6;FGF18;FGF8;PDGFB;ERBB3;ADCY8;KIT;MAPKAP1;FGF1;PCSK5;TNRC6A;FGF2;FGF3;PIK3R1;NET1;IRAK1;ARHGEF3;ARHGEF2;MAGI2;KL;ARHGEF9;ITPR3;ARHGEF12;ITPR2;RPS6KA3;ADCY9;RASGRF2;PDGFRB;MAPK8;THEM4;CALM1
cell morphogenesis involved in differentiation (GO:0000904)	18/147	0.140268	0.733379	-0.124467	0.0385962	MICALL2;FGF8;TGFBR1;EPHB3;SNAI2;SOX9;EPHA2;WT1;DAB2;WDPCP;HEY1;ITGA8;HEG1;TGFBR3;HAS2;SOX17;SRGAP2;ADAM15
blood vessel development (GO:0001568)	12/85	0.105057	0.648026	-0.0861311	0.0373658	ATP7A;MIB1;HOXA1;HEY1;SOCS3;TGFBR3;STRA6;LOX;FZD5;GLI3;ANGPT2;PPAP2B
positive regulation of behavior (GO:0048520)	14/107	0.127704	0.710042	-0.103209	0.0353419	IL6;PDGFB;AIF1;CCR1;C5;S100A14;SLIT2;KDR;SEMA5A;ALB;SERPINE1;VEGFA;PDGFRB;STRA6
divalent inorganic cation transport (GO:0072511)	27/238	0.154734	0.76297	-0.110106	0.0297878	CACHD1;CCR1;CAMK2G;TPCN1;ANXA6;VDR;CUL5;ANK2;MCOLN3;BHLHA15;TRPV4;TRPV6;FGF2;CNNM2;MICU1;TRPM3;CACNA2D1;SLC8A1;TRPM7;SLC3A2;TCN2;ITPR3;CACNA2D2;ITPR2;P2RX1;PLCG2;F2R
cell projection morphogenesis (GO:0048858)	26/228	0.154438	0.76297	-0.107928	0.0291984	ALS2;S100A6;ULK4;EPHB3;EPHB2;OFD1;IGF1R;WDPCP;ANK3;ATG7;DLG4;GALNT11;TSKU;DCLK1;FOXJ1;NTNG1;ZSWIM6;FRZB;FZD5;ATP7A;EPB41L3;WNT7B;MAP1S;CC2D2A;SRGAP2;CDH11
regulation of cell morphogenesis involved in differentiation (GO:0010769)	28/248	0.154919	0.76297	-0.102584	0.0277528	ACHE;HPN;PTPRD;TNIK;FOXA2;TNFRSF12A;EZH2;EPHB3;PTPRO;SLIT2;RUFY3;PBLD;THY1;CAPRIN2;EPHB2;SEMA5A;DAB2;ZNF703;NEDD4;APOE;MAPT;VEGFA;SPG20;TGFBR3;SKIL;CUX1;NET1;ISLR2
nucleobase metabolic process (GO:0009112)	10/67	0.103167	0.644875	-0.0320358	0.0140541	SHMT1;ALDH6A1;GDA;ADSSL1;UPB1;DPYS;UPP2;AGXT2;CAT;NT5E
cell maturation (GO:0048469)	15/118	0.137693	0.733379	-0.0334433	0.0103705	IRX5;EPAS1;FAM20C;PTH1R;PDE3A;FZD5;CABYR;KDR;FARP2;AGPAT6;SLC26A6;BHLHA15;REN;VEGFA;LHX6
regulation of peptidase activity (GO:0052547)	40/372	0.166679	0.774898	-0.0374162	0.00954202	SH3RF1;C5;TNFSF15;CD109;SOX7;SPOCK1;RPS27L;SFN;MAP3K5;SERPINE2;SERPINA6;SERPINA5;SERPINA4;SERPINE1;PYCARD;HSPE1;MYC;DPEP1;CR1;IL6;C4A;AIFM1;BIRC6;SERPINI1;BCL2L13;BIRC2;PCOLCE2;RPS6KA3;UACA;P2RX1;SERPINF1;CPAMD8;VEGFA;SERPINB7;SLPI;FABP1;HSPD1;PROS1;CTSH;F2R
response to carbohydrate (GO:0009743)	17/139	0.149456	0.750349	-0.0181477	0.00521233	NOX4;PFKFB2;SLC37A4;MLXIPL;GRIK5;SPARC;PCK2;SLC26A6;HNF4A;P2RX3;PKLR;APOC3;SFTPC;SLC30A8;APOM;ANGPT2;NR1H4
regulation of peptide hormone secretion (GO:0090276)	22/189	0.157021	0.769019	-0.0177155	0.00465278	FOXA2;GLUD1;CRHBP;BLK;PFKFB2;PDE3B;PARK2;ITPR3;PCK2;CACNA2D2;ITPR2;SLC16A1;HNF4A;NR1D1;SLC2A2;SYBU;MGEA5;PPP3CB;SYTL4;SLC30A8;HADH;LRP5
embryo development ending in birth or egg hatching (GO:0009792)	26/230	0.16402	0.771284	-0.00638086	0.0016571	MTSS1;KDM6A;FOXA2;UTY;USP9X;C5;GLI3;DAB2;COL4A3BP;APBA2;HEG1;ETNK2;INPP5B;MAFF;TGFBR1;RXRA;MBD3;GRHL2;SLIT2;ATP7A;MIB1;WNT7B;VEGFA;PDGFRB;FOXC1;ACVR1
Table D: The 2331 genes, which were down-regulated in SRNS patients compared with SSNS patients, were further analyzed by using Enrichr GO Biological Process program.
Term	Overlap	P-value	Adjusted P-value	Z-score	Combined Score	Genes
establishment of protein localization to membrane (GO:0090150)	17/229	0.817206	1	6.55182	-1.95677e-09	TESC;RTP4;MPP5;PEX5;TSPAN15;RAB31;RPS28;KRT18;ANK2;TSPAN33;ANK3;MGEA5;RPS4Y1;SPTBN1;PDZK1;GOLGA4;EHD3
regulation of vesicle-mediated transport (GO:0060627)	23/306	0.833034	1	6.81927	-2.03665e-09	RAB3C;MAGI2;C4A;SYNJ1;GRIK5;PARK2;PCLO;STX1B;MIB1;LAMP1;DAB2;HMOX1;VEGFA;APOC3;SERPINE1;DLG4;SYTL4;PYCARD;ANXA13;LYPLAL1;TRPV6;SLC30A8;CD14
peptidyl-lysine modification (GO:0018205)	11/153	0.809272	1	6.84591	-2.04461e-09	ATP7A;SUV420H2;NAT8B;NAT8;WDR61;KANSL2;MGEA5;SUV39H1;MBD3;SETD3;HDAC6
mitochondrion organization (GO:0007005)	13/179	0.814819	1	6.90602	-2.06256e-09	ATP7A;ACAA2;EPAS1;BHLHA15;COL4A3BP;ATG7;PEX5;PARK2;SFN;THEM4;TRMT61B;HMGCL;MTFR1
positive regulation of peptidyl-tyrosine phosphorylation (GO:0050731)	10/139	0.800252	1	6.933	-2.07061e-09	IL6;ARHGEF2;PDGFB;CLCF1;ERBB3;VEGFA;KIT;PPAP2B;GHR;IL11
single organism cell adhesion (GO:0098602)	19/259	0.841623	1	6.94048	-2.07285e-09	MICALL2;OLR1;CDH2;KIT;EPHB3;SOX9;CERCAM;SLIT2;THY1;WNT7B;NLGN4Y;ITGA6;PLEKHA7;ITGA8;CD58;VNN1;HBB;PPAP2B;SRGAP2
homophilic cell adhesion via plasma membrane adhesion molecules (GO:0007156)	10/142	0.819406	1	6.97928	-2.08444e-09	CLSTN2;PCDH11Y;FREM2;PCDH11X;CDHR2;PCDH15;CDHR5;CDH2;CEACAM1;CDH11
response to ionizing radiation (GO:0010212)	9/127	0.804647	1	7.06503	-2.11005e-09	NOX4;NABP1;CYP17A1;ATR;SNAI2;MYC;GADD45A;NHEJ1;NET1
positive regulation of cell cycle process (GO:0090068)	16/220	0.833489	1	7.11582	-2.12522e-09	CDC7;FGF8;PDGFB;AIF1;RRP8;UBE2C;CSPP1;PSMB4;IGF1R;CXCR5;PLK1;PDGFRB;NSMCE2;PBX1;NDRG1;LRP5
positive regulation of sequence-specific DNA binding transcription factor activity (GO:0051091)	15/214	0.862723	1	7.15646	-2.13735e-09	IRAK2;IRAK1;ARHGEF2;IL6;AR;TRIM14;EDA2R;KIT;VEGFA;PYCARD;TGFBR3;CAT;MAP3K13;PPAP2B;LRP5
regulation of innate immune response (GO:0045088)	18/254	0.871217	1	7.32915	-2.18893e-09	IRAK2;IRAK1;CR1;SOCS3;LGMN;DAK;UNC93B1;MAPK10;S100A14;BIRC2;LAMP1;RPS6KA3;PYCARD;MAPK8;CTSB;HSPD1;CD226;CD14
extracellular matrix disassembly (GO:0022617)	8/116	0.817009	1	7.35821	-2.19761e-09	HPN;KLKB1;LAMC2;DCN;CTSB;PLG;ADAMTS5;ADAM15
positive regulation of organelle organization (GO:0010638)	25/340	0.867793	1	7.39786	-2.20945e-09	NOX4;MTSS1;FGF8;PDGFB;PDXP;IQGAP2;PARK2;SFN;SNAI2;UBE2C;SEMA5A;IGF1R;PPM1E;WDR61;PLK1;MAPT;VEGFA;SURF4;PYCARD;PDGFRB;NSMCE2;TRPV4;MAPK8;BCAS3;LRP5
G1/S transition of mitotic cell cycle (GO:0000082)	10/152	0.873251	1	7.43105	-2.21936e-09	CDC7;PSMB4;PPP2R3B;CUL5;EIF4EBP1;CCNH;CAMK2G;RRM2;IQGAP3;ACVR1
cellular response to acid chemical (GO:0071229)	10/147	0.848192	1	7.43499	-2.22054e-09	TESC;WNT7B;RARG;PDGFB;ASS1;CPEB4;PDGFC;ABCA1;SOX9;NR1H4
sensory perception (GO:0007600)	33/457	0.915531	1	7.43771	-2.22135e-09	IRX5;LUM;OBP2B;MME;ABCA4;HOXA1;PDE4A;DLG2;TRPM3;GLRB;RAX;EPAS1;CRYAA;NXNL2;ASIC2;PCDH15;CYP4V2;ITPR3;SNAI2;SOD1;GRM1;TMPRSS3;CNGA1;SLC26A4;ALDH7A1;DHRS3;HOXB8;CLIC5;DLL4;P2RX3;NIPSNAP1;USH1C;ABCC6
negative regulation of catabolic process (GO:0009895)	13/190	0.869072	1	7.45648	-2.22696e-09	PPARA;FHIT;NBAS;RASIP1;FBP1;PDE3B;UBE2C;HERC1;SERPINE2;PLK1;TBC1D14;APOC3;BCAS3
regulation of muscle organ development (GO:0048634)	8/114	0.802971	1	7.4666	-2.22998e-09	FGF8;IL6;ANKRD2;SOX17;SOX9;FGF2;FGF3;ACVR1
GTP catabolic process (GO:0006184)	16/243	0.917803	1	7.47076	-2.23122e-09	GNAZ;ADSSL1;RAB3C;ATL2;EIF2S3;RRAD;GCH1;RAB31;GFM1;TUBAL3;TUBB6;TUBA3E;SAR1B;TUBG2;RASD1;EHD3
regulation of proteolysis involved in cellular protein catabolic process (GO:1903050)	10/148	0.853494	1	7.49778	-2.23929e-09	RNF180;FHIT;DAB2;PLK1;RHBDF1;NSMCE2;COMMD1;PARK2;UBE2C;NEK6
single organismal cell-cell adhesion (GO:0016337)	16/235	0.893699	1	7.53743	-2.25114e-09	OLR1;CDH2;KIT;CERCAM;SOX9;SLIT2;THY1;WNT7B;NLGN4Y;ITGA6;PLEKHA7;ITGA8;CD58;VNN1;HBB;PPAP2B
leukocyte activation (GO:0045321)	27/373	0.892604	1	7.54721	-2.25406e-09	AIF1;RORC;KIT;GLI3;IL11;PLCL2;CXCR5;CLCF1;PYCARD;PPP3CB;NDRG1;MT1G;HELLS;DPP4;PIK3R1;ATP11C;DOCK8;FZD5;ATP7A;CCND3;PRLR;SLC7A2;NEDD4;PLCG2;CD79A;HSPD1;NHEJ1
positive regulation of defense response (GO:0031349)	19/272	0.88979	1	7.55132	-2.25528e-09	IRAK2;IRAK1;IL6;IL1RL1;LGMN;UNC93B1;MAPK10;BIRC2;S100A14;LAMP1;RPS6KA3;KLKB1;SERPINE1;PYCARD;MAPK8;CTSB;HSPD1;CD226;CD14
organelle fission (GO:0048285)	22/325	0.928625	1	7.55641	-2.2568e-09	ACOX1;ARHGEF2;MKI67;USP9X;DYNLT3;BIRC6;PAPD5;CEP55;PARK2;SYCP2;EML4;MTFR1;OFD1;FIGN;PLK1;NSMCE2;HAUS7;SMC1A;HELLS;NEK6;ASPM;PPP2R2D
regulation of endocytosis (GO:0030100)	11/165	0.87286	1	7.57714	-2.263e-09	MIB1;DAB2;MAGI2;C4A;VEGFA;SYNJ1;APOC3;SERPINE1;DLG4;PYCARD;CD14
multicellular organismal development (GO:0007275)	31/453	0.951033	1	7.58449	-2.26519e-09	PLXNC1;HMX1;HMGB3;DZIP1;PAQR7;PAQR5;IGSF10;HOXA1;GPX4;PTPLA;CREG1;DND1;SPRED1;FGF1;RBM11;IFRD1;HELLS;ALX1;BST1;ATR;EPHA2;WNT7B;SERPINF1;MEOX2;HOXB8;PLXDC2;RPS4Y1;LCLAT1;ROR2;CUX1;GADD45B
glycosyl compound biosynthetic process (GO:1901659)	8/120	0.842762	1	7.59758	-2.2691e-09	ADSSL1;SLC25A13;PANK1;PKLR;AK2;UPP2;AK4;NT5E
ribonucleotide biosynthetic process (GO:0009260)	9/140	0.878963	1	7.60339	-2.27084e-09	ADSSL1;SLC25A13;ADCY9;PANK1;ADCY8;PKLR;AK2;UPP2;AK4
protein import (GO:0017038)	7/101	0.801991	1	7.61265	-2.2736e-09	APOE;IPO13;TRPS1;PEX5;ING1;PIK3R1;F2R
regulation of response to cytokine stimulus (GO:0060759)	7/101	0.801991	1	7.64069	-2.28198e-09	IRAK2;IRAK1;SOCS3;PYCARD;PARK2;SLIT2;SLIT3
cell-matrix adhesion (GO:0007160)	7/100	0.794209	1	7.65561	-2.28643e-09	ITGA6;TRPM7;ITGA8;ITGA1;ITGB4;ANGPTL3;ADAM15
protein polyubiquitination (GO:0000209)	12/186	0.903958	1	7.66596	-2.28952e-09	RNF180;PSMB4;BLMH;NEDD4;RNF152;PARK2;UBE2C;KLHL3;BIRC2;RNF146;KLHL20;HDAC6
regulation of gene expression, epigenetic (GO:0040029)	8/122	0.854517	1	7.66886	-2.29039e-09	EZH2;SUV39H1;RRP8;TFAP2C;MBD3;HMGA1;HELLS;HDAC6
regulation of I-kappaB kinase/NF-kappaB signaling (GO:0043122)	14/213	0.906356	1	7.67318	-2.29168e-09	IRAK1;SECTM1;IL1RL1;PPM1A;PARK2;BIRC2;TMED4;UACA;HMOX1;PYCARD;CLEC6A;GPR89A;NEK6;F2R
positive regulation of I-kappaB kinase/NF-kappaB signaling (GO:0043123)	11/168	0.88577	1	7.68192	-2.29429e-09	SECTM1;IRAK1;TMED4;HMOX1;PPM1A;CLEC6A;PARK2;BIRC2;GPR89A;NEK6;F2R
regulation of actin polymerization or depolymerization (GO:0008064)	8/122	0.854517	1	7.70471	-2.30109e-09	SEMA5A;FHOD3;PDXP;PYCARD;SPTBN1;IQGAP2;TMSB4Y;SLIT2
purine ribonucleotide biosynthetic process (GO:0009152)	8/126	0.875906	1	7.75319	-2.31558e-09	ADSSL1;SLC25A13;ADCY9;PANK1;ADCY8;PKLR;AK2;AK4
regulation of myeloid cell differentiation (GO:0045637)	10/156	0.890799	1	7.79121	-2.32693e-09	TESC;WDR61;HOXB8;CCR1;FSTL3;CA2;PRDM16;MYC;MEIS1;PIK3R1
response to endoplasmic reticulum stress (GO:0034976)	9/145	0.900573	1	7.80244	-2.33028e-09	DDX11;AIFM1;TPP1;COL4A3BP;PDIA5;GOSR2;PARK2;ANKS4B;WIPI1
antigen receptor-mediated signaling pathway (GO:0050851)	8/127	0.880829	1	7.81544	-2.33416e-09	TNFRSF21;BLK;PLCG2;SPG21;CD79A;HLA-DQA1;PIK3R1;THY1
DNA replication (GO:0006260)	11/186	0.942494	1	7.85349	-2.34553e-09	POLD3;CDC7;FHIT;GINS2;ACHE;CCDC88A;PDGFB;RRM2;ATR;RNASEH2A;NFIA
regulation of lymphocyte differentiation (GO:0045619)	8/124	0.865557	1	7.86063	-2.34766e-09	IL6;FOXJ1;DTX1;VNN1;RORC;ATP11C;SOD1;GLI3
regulation of DNA metabolic process (GO:0051052)	17/265	0.938864	1	7.88506	-2.35496e-09	CDC7;NOX4;ESCO1;PARM1;IL6;CCDC88A;PDGFB;MSH3;AIFM1;ATR;IGF1R;CLCF1;MGEA5;PDGFRB;PDGFC;SMC1A;MYC
single-organism cellular localization (GO:1902580)	34/496	0.957187	1	7.90151	-2.35987e-09	RTP4;GRIK5;PEX5;KIT;GPHN;RPS28;ANK2;APOE;BHLHA15;ANK3;MAPT;DLG4;AGRN;ING1;GOLGA4;EHD3;PIK3R1;TESC;MAGI2;OSBPL8;IPO13;PLEKHF1;EPB41L3;RAB31;KRT18;MAP1S;NEDD4;TRPS1;MGEA5;RPS4Y1;SPTBN1;MAP7;SCP2;F2R
positive regulation of T cell activation (GO:0050870)	12/189	0.913854	1	7.92206	-2.36601e-09	IL6;AIF1;MAPKAP1;PYCARD;HHLA2;VNN1;HSPD1;GLI3;HLA-DQA1;PIK3R1;DPP4;THY1
purine nucleotide biosynthetic process (GO:0006164)	8/132	0.903081	1	7.9296	-2.36826e-09	ADSSL1;SLC25A13;ADCY9;PANK1;ADCY8;PKLR;AK2;AK4
mitotic cell cycle phase transition (GO:0044772)	17/277	0.959663	1	7.94164	-2.37186e-09	CDC7;PPP2R3B;CCNH;CEP135;CAMK2G;PPP1R12B;IQGAP3;OFD1;PSMB4;EIF4EBP1;CUL5;PLK1;RRM2;USH1C;TUBG2;CDK14;ACVR1
G2/M transition of mitotic cell cycle (GO:0000086)	8/139	0.928254	1	7.9679	-2.3797e-09	OFD1;CCNH;PLK1;CEP135;PPP1R12B;USH1C;TUBG2;CDK14
cell cycle phase transition (GO:0044770)	17/280	0.963778	1	7.98565	-2.385e-09	CDC7;PPP2R3B;CCNH;CEP135;CAMK2G;PPP1R12B;IQGAP3;OFD1;PSMB4;EIF4EBP1;CUL5;PLK1;RRM2;USH1C;TUBG2;CDK14;ACVR1
regulation of cyclin-dependent protein serine/threonine kinase activity (GO:0000079)	6/89	0.810109	1	8.05991	-2.40718e-09	PDGFB;CCND3;CCNH;PLK1;SFN;GADD45A
cell recognition (GO:0008037)	7/109	0.856331	1	8.07614	-2.41203e-09	SEMA5A;OPCML;CNTNAP3;DOCK8;EPHB3;CD226;EPHB2
regulation of actin filament-based process (GO:0032970)	16/257	0.949034	1	8.10284	-2.42e-09	NOX4;MTSS1;CCDC88A;PDXP;IQGAP2;PARK2;SLIT2;SEMA5A;PPM1E;ANK2;FHOD3;PYCARD;SPTBN1;PDGFRB;TMSB4Y;BCAS3
multicellular organismal macromolecule metabolic process (GO:0044259)	6/89	0.810109	1	8.18601	-2.44484e-09	TRAM2;PEPD;ACE2;ENPEP;CTSB;ADAM15
regulation of cell activation (GO:0050865)	29/420	0.939646	1	8.19654	-2.44798e-09	TNFRSF21;PDGFB;AIF1;RORC;SHPK;GLI3;SERPINE2;CLCF1;APOE;MAPKAP1;HMOX1;PYCARD;VNN1;DPP4;PIK3R1;IL6;DTX1;IL1RL1;FOXJ1;ATP11C;SOD1;HLA-DQA1;THY1;LAMP1;SLC7A2;HHLA2;HSPD1;PRNP;CD226
organelle localization (GO:0051640)	7/129	0.940898	1	8.26623	-2.4688e-09	GPR162;MAP1S;BHLHA15;MLPH;MAPT;KIT;HDAC6
posttranscriptional regulation of gene expression (GO:0010608)	28/438	0.975578	1	8.27185	-2.47048e-09	IMPACT;HPS4;RPS27L;MYLIP;CPN2;WT1;EIF4EBP1;EIF4EBP2;A1CF;ANK2;HRSP12;SEPSECS;PYCARD;SOX17;PPAP2B;TNRC6A;IL6;TESC;ACO1;FMR1;CAPRIN2;LAMP1;RPS6KA3;PLK1;VEGFA;HSPD1;CTSH;IGFBP5
detection of chemical stimulus involved in sensory perception of smell (GO:0050911)	7/420	1	1	8.30768	-2.48118e-09	OR2T2;OR2T10;OR2T11;OR1L6;OR2T3;OR5M9;OR5AR1
ncRNA metabolic process (GO:0034660)	14/332	0.999478	1	8.3093	-2.48166e-09	FARS2;LSM6;SUV39H1;RRP8;PAPD5;TRMT61B;RPS28;CTU1;TRMT11;TRMT13;WDR77;SEPSECS;WDR12;CIRH1A
regulation of striated muscle tissue development (GO:0016202)	7/112	0.873305	1	8.31472	-2.48328e-09	FGF8;ANKRD2;SOX17;SOX9;FGF2;FGF3;ACVR1
rRNA processing (GO:0006364)	7/120	0.910602	1	8.3283	-2.48734e-09	RPS28;LSM6;SUV39H1;WDR12;PAPD5;RRP8;CIRH1A
positive regulation of protein ubiquitination (GO:0031398)	8/146	0.947545	1	8.32952	-2.4877e-09	RNF180;PSMB4;PLK1;COMMD1;PARK2;ARRDC4;UBE2C;BIRC2
ncRNA processing (GO:0034470)	12/241	0.990103	1	8.33792	-2.49021e-09	RPS28;TRMT11;CTU1;TRMT13;LSM6;FARS2;SUV39H1;WDR12;PAPD5;RRP8;CIRH1A;TRMT61B
establishment of protein localization to organelle (GO:0072594)	11/292	0.999678	1	8.34007	-2.49085e-09	LAMP1;RPS28;NEDD4;IPO13;TRPS1;RPS4Y1;PEX5;GOLGA4;ING1;PIK3R1;F2R
RNA splicing (GO:0008380)	12/313	0.999746	1	8.34116	-2.49118e-09	RBMY1F;RBM15B;LSM6;SAP18;PPIL3;LSM3;RNPC3;SF3A2;SMC1A;RBM11;WT1;RBMY1B
regulation of leukocyte activation (GO:0002694)	26/390	0.952291	1	8.36263	-2.49759e-09	TNFRSF21;AIF1;RORC;SHPK;GLI3;CLCF1;HMOX1;MAPKAP1;PYCARD;VNN1;DPP4;PIK3R1;IL6;DTX1;IL1RL1;FOXJ1;ATP11C;SOD1;HLA-DQA1;THY1;LAMP1;SLC7A2;HHLA2;HSPD1;PRNP;CD226
cellular component disassembly (GO:0022411)	19/350	0.992845	1	8.36284	-2.49765e-09	HPN;LMNB1;SYNJ1;DCN;SNAI2;HMGA1;BIRC2;PLG;RPS28;PLK1;KLKB1;MAPT;RPS4Y1;LAMC2;CTSB;ADAMTS5;NEK6;ADAM15;HDAC6
regulation of muscle tissue development (GO:1901861)	7/113	0.878581	1	8.36692	-2.49887e-09	FGF8;ANKRD2;SOX17;SOX9;FGF2;FGF3;ACVR1
rRNA metabolic process (GO:0016072)	7/126	0.931993	1	8.39147	-2.5062e-09	RPS28;LSM6;SUV39H1;WDR12;PAPD5;RRP8;CIRH1A
positive regulation of leukocyte differentiation (GO:1902107)	7/118	0.902287	1	8.39643	-2.50769e-09	IL6;TESC;CCR1;VNN1;CA2;ATP11C;GLI3
positive regulation of cytokine production (GO:0001819)	20/327	0.97131	1	8.42027	-2.51481e-09	ARHGEF2;IL6;IL1RL1;C5;TNFSF15;SOD1;FZD5;SULF2;HMOX1;CD58;SERPINE1;SULF1;SERPINB7;PYCARD;HHLA2;CLEC6A;HSPD1;PIK3R1;CD14;F2R
protein localization to organelle (GO:0033365)	19/396	0.999014	1	8.42843	-2.51724e-09	GPR162;OSBPL8;TTC21B;IPO13;EZH2;PEX5;ATP6V1D;RPS28;ANK2;PLK1;NEDD4;TRPS1;PIKFYVE;PYGO1;RPS4Y1;ING1;GOLGA4;PIK3R1;F2R
regulation of protein polymerization (GO:0032271)	7/127	0.935084	1	8.44008	-2.52072e-09	MAPT;FHOD3;PYCARD;SPTBN1;IQGAP2;TMSB4Y;SLIT2
DNA repair (GO:0006281)	20/403	0.998597	1	8.44356	-2.52176e-09	MSH3;CCNH;MSH5;SMC6;RPS27L;ATR;RNASEH2A;HMGA1;POLD3;NABP1;UHRF1;TDP2;NSMCE2;PMS2;OGG1;SMC1A;NHEJ1;GADD45A;C19ORF40;FANCC
macromolecule methylation (GO:0043414)	9/169	0.964484	1	8.45922	-2.52644e-09	SUV420H2;KDM6A;WDR61;BHMT;EZH2;SUV39H1;SETD3;HELLS;TRMT61B
regulation of protein ubiquitination (GO:0031396)	11/212	0.981044	1	8.46483	-2.52811e-09	RNF180;PSMB4;NXN;PLK1;ATG7;TGFBR1;COMMD1;PARK2;ARRDC4;UBE2C;BIRC2
nucleobase-containing compound transport (GO:0015931)	8/180	0.990154	1	8.4806	-2.53282e-09	TST;SLC29A2;SLC35D1;SLC29A4;FMR1;SLC35B4;KIF5C;SLC28A1
proteolysis involved in cellular protein catabolic process (GO:0051603)	20/391	0.997638	1	8.4823	-2.53333e-09	NPLOC4;USP40;USP9Y;LGMN;USP9X;FOXRED2;PARK2;UBE2C;BIRC2;PSMB4;CUL5;NR1D1;PLK1;NEDD4;FBXL5;CTSB;PCYOX1;FBXO21;KLHL20;HDAC6
regulation of mitotic cell cycle (GO:0007346)	24/391	0.979902	1	8.48691	-2.53471e-09	CDC7;FGF8;PDGFB;AIF1;EZH2;PDXP;DYNLT3;RPRM;RPS27L;UBE2C;PKIA;PSMB4;IGF1R;NABP1;EIF4EBP1;PLK1;PTPLA;PDGFRB;NSMCE2;FOXC1;PBX1;SMC1A;NEK6;LRP5
mRNA processing (GO:0006397)	15/397	0.999961	1	8.49628	-2.53751e-09	PAN2;RBMY1F;A1CF;CCNH;RBM15B;LSM6;SAP18;PPIL3;PAPD5;LSM3;RNPC3;SF3A2;SMC1A;RBM11;RBMY1B
proteasome-mediated ubiquitin-dependent protein catabolic process (GO:0043161)	9/205	0.993914	1	8.50499	-2.54011e-09	PSMB4;NPLOC4;PLK1;FOXRED2;FBXL5;PARK2;UBE2C;BIRC2;KLHL20
regulation of cell cycle phase transition (GO:1901987)	14/264	0.986925	1	8.50579	-2.54035e-09	CDC7;AIF1;EZH2;RPS27L;UBE2C;PKIA;PSMB4;NABP1;PLK1;PTPLA;NSMCE2;PBX1;SMC1A;NEK6
tRNA processing (GO:0008033)	6/98	0.871455	1	8.51424	-2.54287e-09	TRMT11;CTU1;TRMT13;LSM6;FARS2;TRMT61B
modification-dependent protein catabolic process (GO:0019941)	17/364	0.998928	1	8.51502	-2.5431e-09	NPLOC4;USP40;USP9Y;USP9X;FOXRED2;PARK2;UBE2C;BIRC2;PSMB4;CUL5;PLK1;NEDD4;FBXL5;PCYOX1;FBXO21;KLHL20;HDAC6
ubiquitin-dependent protein catabolic process (GO:0006511)	16/355	0.999207	1	8.53045	-2.54771e-09	NPLOC4;USP40;USP9Y;USP9X;FOXRED2;PARK2;UBE2C;BIRC2;PSMB4;CUL5;PLK1;NEDD4;FBXL5;FBXO21;KLHL20;HDAC6
translation (GO:0006412)	9/264	0.999777	1	8.53465	-2.54897e-09	EIF4EBP1;RPS28;EIF4EBP2;EIF1AX;RPS4Y2;RPS4Y1;EIF2S3;RPS27L;RMND1
regulation of cell cycle process (GO:0010564)	30/481	0.985608	1	8.53591	-2.54934e-09	FGF8;PDGFB;AIF1;EZH2;RPS27L;SOX9;IGF1R;PSMB4;CXCR5;PTPLA;NSMCE2;NDRG1;CDC7;MLXIPL;PDXP;BIRC6;PDE3A;RRP8;UBE2C;PKIA;CSPP1;NABP1;PLK1;PDGFRB;PBX1;CHORDC1;SMC1A;NEK6;LRP5;CALM1
mRNA catabolic process (GO:0006402)	7/193	0.998106	1	8.53743	-2.5498e-09	PAN2;RPS28;NBAS;LSM6;RPS4Y1;PAPD5;LSM3
positive regulation of protein modification by small protein conjugation or removal (GO:1903322)	8/158	0.97014	1	8.54436	-2.55187e-09	RNF180;PSMB4;PLK1;COMMD1;PARK2;ARRDC4;UBE2C;BIRC2
response to bacterium (GO:0009617)	9/201	0.992513	1	8.58674	-2.56452e-09	IL6;PLD1;SERPINE1;LYZ;PYCARD;ACP5;FUCA2;S100A14;ADAMTS5
regulation of chromosome organization (GO:0033044)	9/172	0.969053	1	8.59157	-2.56597e-09	WDR61;PLK1;TRPS1;VEGFA;NSMCE2;MAPK8;SNAI2;UBE2C;MYC
defense response to other organism (GO:0098542)	10/328	0.999986	1	8.64064	-2.58062e-09	IL6;PLD1;SERPINE1;LYZ;PYCARD;UNC93B1;ACP5;CLEC6A;S100A14;ADAMTS5
cell cycle checkpoint (GO:0000075)	7/156	0.9848	1	8.64983	-2.58336e-09	NABP1;PLK1;RPS27L;ATR;SMC1A;UBE2C;NEK6
sensory perception of chemical stimulus (GO:0007606)	6/100	0.882577	1	8.66146	-2.58684e-09	NXNL2;PDE4A;P2RX3;OBP2B;ASIC2;ITPR3
mRNA splicing, via spliceosome (GO:0000398)	4/177	0.999872	1	8.69725	-2.59753e-09	PPIL3;LSM3;SF3A2;SMC1A
response to virus (GO:0009615)	10/250	0.998694	1	8.69944	-2.59818e-09	IL6;NPC2;XPR1;GYPA;ACE2;PYCARD;UNC93B1;ANPEP;HMGA1;DCLK1
RNA splicing, via transesterification reactions (GO:0000375)	4/184	0.999923	1	8.72544	-2.60595e-09	PPIL3;LSM3;SF3A2;SMC1A
spindle organization (GO:0007051)	5/74	0.794815	1	8.75078	-2.61352e-09	OFD1;SPAG5;HAUS7;SMC1A;NEK6
regulation of cytokine production (GO:0001817)	29/482	0.99107	1	8.76653	-2.61822e-09	TNFRSF21;C5;SLC37A4;TNFSF15;ACP5;APOD;HMOX1;SERPINE1;RNF128;PYCARD;CLEC6A;PIK3R1;IL6;ARHGEF2;IL1RL1;FOXJ1;FZD5;SNAI2;SOD1;SULF2;CD58;SERPINB7;SULF1;ACE2;HHLA2;HSPD1;PRNP;CD14;F2R
regulation of symbiosis, encompassing mutualism through parasitism (GO:0043903)	7/174	0.994328	1	8.77528	-2.62083e-09	HPN;CCNH;PM20D1;TRIM14;SLPI;YTHDC2;FUCA2
macromolecular complex disassembly (GO:0032984)	5/142	0.994998	1	8.80444	-2.62954e-09	RPS28;SYNJ1;RPS4Y1;HMGA1;HDAC6
regulation of muscle cell differentiation (GO:0051147)	6/122	0.959881	1	8.80915	-2.63095e-09	EZH2;ANKRD2;CDH2;NEO1;SOX9;SETD3
negative regulation of intrinsic apoptotic signaling pathway (GO:2001243)	5/75	0.803745	1	8.82875	-2.6368e-09	ARHGEF2;VNN1;PARK2;SNAI2;HELLS
regulation of viral process (GO:0050792)	6/152	0.992297	1	8.84426	-2.64143e-09	HPN;CCNH;PM20D1;TRIM14;SLPI;YTHDC2
regulation of tumor necrosis factor production (GO:0032680)	5/78	0.828694	1	8.84456	-2.64152e-09	ARHGEF2;PYCARD;ACP5;PIK3R1;CD14
negative regulation of cell cycle process (GO:0010948)	8/254	0.999862	1	8.85167	-2.64365e-09	PSMB4;NABP1;PLK1;EZH2;MLXIPL;RPS27L;SMC1A;UBE2C
protein complex disassembly (GO:0043241)	5/132	0.990772	1	8.87168	-2.64962e-09	RPS28;SYNJ1;RPS4Y1;HMGA1;HDAC6
negative regulation of mitotic cell cycle phase transition (GO:1901991)	7/192	0.997991	1	8.87948	-2.65195e-09	PSMB4;NABP1;PLK1;EZH2;RPS27L;SMC1A;UBE2C
cytokinesis (GO:0000910)	5/79	0.836416	1	8.8892	-2.65486e-09	ANK3;PLK1;SPTBN1;CEP55;NEK6
regulation of mononuclear cell proliferation (GO:0032944)	8/171	0.984327	1	8.91836	-2.66356e-09	TNFRSF21;IL6;CLCF1;AIF1;FOXJ1;PYCARD;HHLA2;PRNP
regulation of lymphocyte proliferation (GO:0050670)	8/170	0.983511	1	8.93414	-2.66828e-09	TNFRSF21;IL6;CLCF1;AIF1;FOXJ1;PYCARD;HHLA2;PRNP
regulation of cyclic nucleotide metabolic process (GO:0030799)	5/133	0.991313	1	8.94847	-2.67256e-09	APOE;NPR3;ABCA1;PDZD3;CALM1
regulation of leukocyte proliferation (GO:0070663)	8/176	0.987873	1	8.95181	-2.67356e-09	TNFRSF21;IL6;CLCF1;AIF1;FOXJ1;PYCARD;HHLA2;PRNP
regulation of tumor necrosis factor superfamily cytokine production (GO:1903555)	5/80	0.84385	1	8.95261	-2.67379e-09	ARHGEF2;PYCARD;ACP5;PIK3R1;CD14
establishment of RNA localization (GO:0051236)	3/153	0.999852	1	8.95384	-2.67416e-09	TST;FMR1;KIF5C
negative regulation of leukocyte activation (GO:0002695)	6/120	0.955528	1	8.9557	-2.67472e-09	TNFRSF21;FOXJ1;DTX1;HMOX1;PRNP;GLI3
RNA transport (GO:0050658)	3/153	0.999852	1	8.95858	-2.67558e-09	TST;FMR1;KIF5C
lymphocyte costimulation (GO:0031294)	5/77	0.820679	1	8.9668	-2.67803e-09	MAPKAP1;HHLA2;HLA-DQA1;PIK3R1;DPP4
T cell costimulation (GO:0031295)	5/76	0.812365	1	8.99239	-2.68567e-09	MAPKAP1;HHLA2;HLA-DQA1;PIK3R1;DPP4
positive regulation of protein complex assembly (GO:0031334)	6/122	0.959881	1	8.99518	-2.68651e-09	HNF1A;MAPT;VEGFA;PYCARD;IQGAP2;HDAC6
chromatin remodeling (GO:0006338)	5/118	0.978909	1	9.02561	-2.6956e-09	MBD3;SOX9;HMGA1;MYC;HELLS
positive regulation of leukocyte mediated immunity (GO:0002705)	5/78	0.828694	1	9.08489	-2.7133e-09	LAMP1;AZGP1;CLCF1;HSPD1;CD226
regulation of G1/S transition of mitotic cell cycle (GO:2000045)	5/129	0.988948	1	9.08747	-2.71407e-09	PSMB4;AIF1;EZH2;PTPLA;RPS27L
double-strand break repair (GO:0006302)	5/114	0.973488	1	9.09018	-2.71488e-09	NABP1;TDP2;NSMCE2;SMC6;NHEJ1
translational elongation (GO:0006414)	4/114	0.990483	1	9.13418	-2.72802e-09	RPS28;GFM1;SEPSECS;RPS4Y1
regulation of cyclic nucleotide biosynthetic process (GO:0030802)	5/116	0.976343	1	9.15745	-2.73497e-09	APOE;NPR3;ABCA1;PDZD3;CALM1
ribonucleoprotein complex assembly (GO:0022618)	2/138	0.999929	1	9.16506	-2.73725e-09	WDR77;SF3A2
endoplasmic reticulum unfolded protein response (GO:0030968)	5/83	0.864493	1	9.1769	-2.74078e-09	DDX11;TPP1;PDIA5;GOSR2;WIPI1
cellular component biogenesis (GO:0044085)	5/89	0.898933	1	9.21426	-2.75194e-09	COX14;RPS28;AIFM1;COA1;WDR12
mitotic cell cycle checkpoint (GO:0007093)	5/103	0.951224	1	9.22536	-2.75525e-09	NABP1;PLK1;RPS27L;SMC1A;UBE2C
extrinsic apoptotic signaling pathway (GO:0097191)	5/92	0.91311	1	9.2304	-2.75676e-09	KRT18;TNFRSF12A;ERBB3;G0S2;PIK3R1
regulation of ligase activity (GO:0051340)	5/108	0.962893	1	9.23864	-2.75922e-09	PSMB4;PLK1;ARRDC4;UBE2C;NHEJ1
positive regulation of leukocyte proliferation (GO:0070665)	5/119	0.980092	1	9.23886	-2.75929e-09	IL6;CLCF1;AIF1;PYCARD;HHLA2
ER-nucleus signaling pathway (GO:0006984)	5/94	0.921562	1	9.2392	-2.75939e-09	DDX11;TPP1;PDIA5;GOSR2;WIPI1
mRNA transport (GO:0051028)	2/134	0.999902	1	9.24126	-2.76e-09	FMR1;KIF5C
positive regulation of ligase activity (GO:0051351)	5/92	0.91311	1	9.25609	-2.76443e-09	PSMB4;PLK1;ARRDC4;UBE2C;NHEJ1
positive regulation of multi-organism process (GO:0043902)	4/123	0.994689	1	9.29412	-2.77579e-09	HPN;CCNH;YTHDC2;PDE3A
nuclear-transcribed mRNA catabolic process, nonsense-mediated decay (GO:0000184)	2/117	0.999619	1	9.29629	-2.77644e-09	RPS28;RPS4Y1
regulation of response to biotic stimulus (GO:0002831)	5/107	0.960787	1	9.30453	-2.7789e-09	AP1M1;PM20D1;HSPD1;CD226;BIRC2
feeding behavior (GO:0007631)	5/87	0.888401	1	9.31319	-2.78148e-09	REN;GLS;ACE2;STRA6;DACH1
positive regulation of lymphocyte proliferation (GO:0050671)	5/115	0.974953	1	9.31387	-2.78169e-09	IL6;CLCF1;AIF1;PYCARD;HHLA2
immune response-regulating cell surface receptor signaling pathway (GO:0002768)	31/444	0.937617	1	9.3251	-2.78504e-09	FGF6;TNFRSF21;FGF18;FGF8;PDGFB;ERBB3;BLK;KIT;MAPKAP1;PPP3CB;SPG21;WIPF1;FGF1;TNRC6A;FGF2;NFATC3;FGF3;PIK3R1;CR1;KL;MAPK10;ITPR3;HLA-DQA1;ITPR2;THY1;PLCG2;PDGFRB;MAPK8;CD79A;THEM4;CALM1
negative regulation of lymphocyte activation (GO:0051250)	5/102	0.948523	1	9.4186	-2.81297e-09	TNFRSF21;FOXJ1;DTX1;PRNP;GLI3
cotranslational protein targeting to membrane (GO:0006613)	2/110	0.999336	1	9.42726	-2.81555e-09	RPS28;RPS4Y1
regulation of neural precursor cell proliferation (GO:2000177)	4/65	0.834766	1	9.4387	-2.81897e-09	DLL4;VEGFA;GLI3;ASPM
electron transport chain (GO:0022900)	1/115	0.999958	1	9.44839	-2.82186e-09	NDUFC2
meiotic cell cycle process (GO:1903046)	5/93	0.917431	1	9.4638	-2.82647e-09	MSH3;PLK1;MSH5;LEPREL4;SYCP2
adenylate cyclase-inhibiting G-protein coupled receptor signaling pathway (GO:0007193)	4/62	0.808074	1	9.46798	-2.82771e-09	GNAZ;ADCY9;ADCY8;NPR3
establishment of vesicle localization (GO:0051650)	5/95	0.925509	1	9.49148	-2.83473e-09	DDC;STX7;SYNJ1;DENND1A;PCLO
associative learning (GO:0008306)	4/65	0.834766	1	9.51467	-2.84166e-09	GPR162;LRRN4;PPP1R1B;KIT
regulation of mitochondrion organization (GO:0010821)	5/97	0.932877	1	9.5547	-2.85361e-09	ACAA2;PYCARD;MAPK8;PARK2;SFN
regulation of cAMP metabolic process (GO:0030814)	3/113	0.997199	1	9.56631	-2.85708e-09	NPR3;ABCA1;CALM1
negative regulation of protein ubiquitination (GO:0031397)	3/113	0.997199	1	9.58404	-2.86238e-09	PSMB4;NXN;UBE2C
regulation of skeletal muscle tissue development (GO:0048641)	4/61	0.798428	1	9.58431	-2.86246e-09	ANKRD2;SOX17;SOX9;ACVR1
respiratory electron transport chain (GO:0022904)	1/112	0.999946	1	9.61161	-2.87061e-09	NDUFC2
regulation of translational initiation (GO:0006446)	4/66	0.842946	1	9.65149	-2.88252e-09	EIF4EBP1;EIF4EBP2;IMPACT;FMR1
ensheathment of neurons (GO:0007272)	4/62	0.808074	1	9.65456	-2.88344e-09	TNFRSF21;ASPA;TSPAN2;CLDN5
regulation of actin filament bundle assembly (GO:0032231)	4/62	0.808074	1	9.66761	-2.88734e-09	NOX4;MTSS1;PPM1E;PARK2
Fc receptor signaling pathway (GO:0038093)	24/352	0.93156	1	9.69153	-2.89448e-09	FGF6;FGF18;FGF8;PDGFB;ERBB3;KL;KIT;MAPK10;ITPR3;ITPR2;MAPKAP1;PLCG2;PPP3CB;PDGFRB;MAPK8;WIPF1;FGF1;THEM4;NFATC3;FGF2;TNRC6A;PIK3R1;FGF3;CALM1
regulation of neurotransmitter transport (GO:0051588)	4/63	0.817339	1	9.83785	-2.93818e-09	SNCAIP;GRIK5;PARK2;STX1B
positive regulation of T cell proliferation (GO:0042102)	4/83	0.937396	1	9.85742	-2.94403e-09	IL6;AIF1;PYCARD;HHLA2
DNA integrity checkpoint (GO:0031570)	4/86	0.94729	1	9.86597	-2.94658e-09	PLK1;RPS27L;ATR;NEK6
positive regulation of ubiquitin-protein transferase activity (GO:0051443)	4/87	0.950255	1	9.91138	-2.96014e-09	PSMB4;PLK1;ARRDC4;UBE2C
intracellular steroid hormone receptor signaling pathway (GO:0030518)	4/73	0.891131	1	9.91508	-2.96125e-09	AR;NEDD4;PIAS2;NR3C1
regulation of type I interferon production (GO:0032479)	2/108	0.999222	1	9.95992	-2.97464e-09	PYCARD;HSPD1
negative regulation of protein catabolic process (GO:0042177)	4/97	0.972519	1	9.97658	-2.97961e-09	FHIT;SERPINE2;PLK1;UBE2C
regulation of mRNA metabolic process (GO:1903311)	4/76	0.907464	1	10.0213	-2.99298e-09	NBAS;RBM15B;SAP18;RBM11
female pregnancy (GO:0007565)	4/85	0.944163	1	10.0305	-2.99573e-09	PAPPA;CLIC5;CRHBP;HPGD
positive regulation of inflammatory response (GO:0050729)	4/88	0.953067	1	10.0438	-2.9997e-09	IL6;IL1RL1;KLKB1;SERPINE1
nucleotide-excision repair (GO:0006289)	4/75	0.902278	1	10.0465	-3.0005e-09	POLD3;CCNH;OGG1;FANCC
RNA 3'-end processing (GO:0031123)	1/101	0.999858	1	10.0634	-3.00553e-09	PAN2
regulation of cytokine biosynthetic process (GO:0042035)	4/93	0.965052	1	10.0918	-3.01402e-09	IL6;FOXJ1;HMOX1;RNF128
negative regulation of cell cycle G1/S phase transition (GO:1902807)	3/99	0.992487	1	10.1406	-3.02861e-09	PSMB4;EZH2;RPS27L
negative regulation of immune effector process (GO:0002698)	4/81	0.929892	1	10.1697	-3.03728e-09	CR1;FOXJ1;HMOX1;PPP3CB
translational termination (GO:0006415)	2/89	0.996568	1	10.1988	-3.04599e-09	RPS28;RPS4Y1
positive regulation of blood circulation (GO:1903524)	4/72	0.88515	1	10.2095	-3.04919e-09	SCPEP1;HMOX1;EPHX2;F2R
immune response-activating signal transduction (GO:0002757)	24/440	0.996677	1	10.2219	-3.05287e-09	IRAK2;TNFRSF21;IRAK1;CR1;LGMN;BLK;UNC93B1;MAPK10;ITPR3;BIRC2;S100A14;HLA-DQA1;THY1;ITPR2;RPS6KA3;PLCG2;SPG21;MAPK8;CTSB;HSPD1;WIPF1;CD79A;PIK3R1;CD14
positive regulation of cyclic nucleotide metabolic process (GO:0030801)	3/91	0.986974	1	10.2963	-3.0751e-09	APOE;ABCA1;CALM1
DNA damage response, signal transduction by p53 class mediator (GO:0030330)	2/91	0.99706	1	10.4137	-3.11017e-09	PSMB4;NDRG1
regulation of lyase activity (GO:0051339)	3/77	0.966862	1	10.5386	-3.14747e-09	NPR3;PDZD3;CALM1
regulation of striated muscle cell differentiation (GO:0051153)	3/85	0.980468	1	10.5664	-3.15576e-09	EZH2;ANKRD2;SOX9
regulation of organelle assembly (GO:1902115)	3/80	0.972776	1	10.5895	-3.16266e-09	GPR162;TBC1D14;TBC1D19
positive regulation of purine nucleotide biosynthetic process (GO:1900373)	3/84	0.979118	1	10.6371	-3.17688e-09	APOE;ABCA1;CALM1
positive regulation of cyclic nucleotide biosynthetic process (GO:0030804)	3/82	0.976146	1	10.6574	-3.18294e-09	APOE;ABCA1;CALM1
positive regulation of cell cycle arrest (GO:0071158)	2/85	0.995329	1	10.6782	-3.18915e-09	PSMB4;RRP8
positive regulation of ubiquitin-protein ligase activity involved in mitotic cell cycle (GO:0051437)	3/72	0.954237	1	10.703	-3.19656e-09	PSMB4;PLK1;UBE2C
regulation of RNA splicing (GO:0043484)	3/73	0.957076	1	10.7113	-3.19905e-09	RBM15B;SAP18;RBM11
positive regulation of viral process (GO:0048524)	3/81	0.974514	1	10.7203	-3.20172e-09	HPN;CCNH;YTHDC2
mRNA 3'-end processing (GO:0031124)	1/85	0.999428	1	10.8116	-3.22901e-09	PAN2
positive regulation of myeloid cell differentiation (GO:0045639)	3/74	0.95975	1	10.8184	-3.23103e-09	TESC;CCR1;CA2
positive regulation of muscle cell differentiation (GO:0051149)	3/70	0.948025	1	10.8758	-3.24817e-09	CDH2;NEO1;SETD3
retina development in camera-type eye (GO:0060041)	3/58	0.891206	1	10.8927	-3.25321e-09	ACHE;SOX9;BMPR1B
adaptive immune response based on somatic recombination of immune receptors built from immunoglobulin superfamily domains (GO:0002460)	3/57	0.884552	1	10.9013	-3.2558e-09	VEGFA;HSPD1;CTSH
antigen processing and presentation of exogenous peptide antigen via MHC class I (GO:0042590)	1/79	0.999036	1	10.9096	-3.25827e-09	PSMB4
telomere organization (GO:0032200)	3/63	0.919579	1	10.911	-3.25869e-09	POLD3;NSMCE2;SMC6
negative regulation of chromosome organization (GO:2001251)	2/80	0.993151	1	10.9226	-3.26216e-09	PLK1;UBE2C
cellular component disassembly involved in execution phase of apoptosis (GO:0006921)	3/53	0.854171	1	10.9283	-3.26387e-09	LMNB1;MAPT;BIRC2
negative regulation of synaptic transmission (GO:0050805)	3/47	0.795606	1	10.932	-3.26495e-09	ACHE;ABHD6;MGLL
regulation of mRNA processing (GO:0050684)	3/69	0.944632	1	10.9408	-3.26759e-09	RBM15B;SAP18;RBM11
negative regulation of ubiquitin-protein transferase activity (GO:0051444)	2/74	0.989204	1	11.0097	-3.28817e-09	PSMB4;UBE2C
heart looping (GO:0001947)	3/55	0.870144	1	11.0313	-3.29461e-09	MIB1;FGF8;SOX17
positive regulation of protein binding (GO:0032092)	3/53	0.854171	1	11.0411	-3.29756e-09	PLCL2;MFNG;CAPRIN2
regulation of cardiac muscle tissue development (GO:0055024)	3/48	0.806565	1	11.0541	-3.30144e-09	FGF8;FGF2;FGF3
mitochondrial membrane organization (GO:0007006)	3/51	0.836506	1	11.121	-3.32141e-09	ACAA2;PEX5;THEM4
positive regulation of interferon-gamma production (GO:0032729)	3/52	0.845558	1	11.1438	-3.32823e-09	PYCARD;HSPD1;FZD5
sensory perception of smell (GO:0007608)	3/61	0.909153	1	11.1581	-3.33247e-09	NXNL2;PDE4A;OBP2B
regulation of leukocyte apoptotic process (GO:2000106)	2/71	0.986469	1	11.2205	-3.35111e-09	RORC;DOCK8
positive regulation of histone modification (GO:0031058)	3/55	0.870144	1	11.2617	-3.36342e-09	WDR61;VEGFA;SNAI2
negative regulation of cellular protein catabolic process (GO:1903363)	3/64	0.924372	1	11.2712	-3.36627e-09	FHIT;PLK1;UBE2C
regulation of transcription factor import into nucleus (GO:0042990)	2/73	0.988358	1	11.2815	-3.36935e-09	UACA;PPM1A
positive regulation of myeloid leukocyte differentiation (GO:0002763)	3/47	0.795606	1	11.2952	-3.37343e-09	TESC;CCR1;CA2
recombinational repair (GO:0000725)	3/62	0.914511	1	11.369	-3.39547e-09	NABP1;NSMCE2;SMC6
negative regulation of proteolysis involved in cellular protein catabolic process (GO:1903051)	3/61	0.909153	1	11.3743	-3.39707e-09	FHIT;PLK1;UBE2C
positive regulation of type I interferon production (GO:0032481)	1/77	0.998853	1	11.3983	-3.40423e-09	HSPD1
negative regulation of leukocyte proliferation (GO:0070664)	3/56	0.877536	1	11.4553	-3.42126e-09	TNFRSF21;FOXJ1;PRNP
'de novo' posttranslational protein folding (GO:0051084)	3/49	0.817025	1	11.4554	-3.42129e-09	ENTPD5;TUBB6;DNAJB1
Fc receptor mediated stimulatory signaling pathway (GO:0002431)	5/204	0.999917	1	11.4612	-3.42302e-09	PLCG2;WIPF1;ITPR3;PIK3R1;ITPR2
nuclear-transcribed mRNA catabolic process, deadenylation-dependent decay (GO:0000288)	3/53	0.854171	1	11.4826	-3.42941e-09	PAN2;LSM6;LSM3
negative regulation of proteasomal ubiquitin-dependent protein catabolic process (GO:0032435)	3/52	0.845558	1	11.5001	-3.43462e-09	FHIT;PLK1;UBE2C
Fc-gamma receptor signaling pathway (GO:0038094)	5/203	0.999911	1	11.5108	-3.43783e-09	PLCG2;WIPF1;ITPR3;PIK3R1;ITPR2
signal transduction involved in cell cycle checkpoint (GO:0072395)	1/72	0.998228	1	11.5516	-3.45001e-09	PSMB4
signal transduction involved in DNA damage checkpoint (GO:0072422)	1/71	0.998067	1	11.6675	-3.48463e-09	PSMB4
cellular response to type I interferon (GO:0071357)	2/65	0.978834	1	11.694	-3.49255e-09	SOCS3;IP6K2
regulation of adenylate cyclase activity (GO:0045761)	2/62	0.973586	1	11.6995	-3.49418e-09	NPR3;CALM1
signal transduction involved in mitotic DNA damage checkpoint (GO:1902402)	1/69	0.997699	1	11.807	-3.5263e-09	PSMB4
positive regulation of translation (GO:0045727)	2/66	0.980347	1	11.8331	-3.53408e-09	IL6;RPS27L
transcription elongation from RNA polymerase II promoter (GO:0006368)	2/67	0.981755	1	11.862	-3.54272e-09	CCNH;ELL2
signal transduction involved in mitotic G1 DNA damage checkpoint (GO:0072431)	1/68	0.99749	1	11.8715	-3.54554e-09	PSMB4
DNA damage response, signal transduction by p53 class mediator resulting in cell cycle arrest (GO:0006977)	1/67	0.997262	1	11.9159	-3.5588e-09	PSMB4
spermatid development (GO:0007286)	2/58	0.964604	1	11.9934	-3.58195e-09	SPAG6;KIT
homotypic cell-cell adhesion (GO:0034109)	2/57	0.961936	1	12.0116	-3.5874e-09	HBB;PPAP2B
regulation of DNA recombination (GO:0000018)	2/52	0.945434	1	12.2217	-3.65015e-09	MSH3;CLCF1
ribonucleoside triphosphate biosynthetic process (GO:0009201)	2/58	0.964604	1	12.2792	-3.6673e-09	SLC25A13;PKLR
DNA geometric change (GO:0032392)	2/57	0.961936	1	12.3159	-3.67827e-09	DDX11;HMGA1
DNA duplex unwinding (GO:0032508)	2/55	0.956008	1	12.3731	-3.69537e-09	DDX11;HMGA1
negative regulation of nuclear division (GO:0051784)	2/54	0.952722	1	12.3765	-3.69639e-09	PLK1;UBE2C
DNA methylation or demethylation (GO:0044728)	2/56	0.959075	1	12.4068	-3.70542e-09	EZH2;HELLS
positive regulation of actin filament polymerization (GO:0030838)	2/57	0.961936	1	12.4672	-3.72346e-09	PYCARD;IQGAP2
nuclear envelope organization (GO:0006998)	2/52	0.945434	1	12.4731	-3.72523e-09	PLK1;NEK6
positive regulation of production of molecular mediator of immune response (GO:0002702)	2/52	0.945434	1	12.4773	-3.72647e-09	IL6;CLCF1
cell-cell recognition (GO:0009988)	1/57	0.993469	1	12.547	-3.74729e-09	DOCK8
lymphocyte mediated immunity (GO:0002449)	2/53	0.949203	1	12.6476	-3.77733e-09	HSPD1;CTSH
positive regulation of alpha-beta T cell activation (GO:0046635)	2/48	0.927528	1	12.6712	-3.78438e-09	IL6;GLI3
positive regulation of viral transcription (GO:0050434)	2/54	0.952722	1	12.8288	-3.83145e-09	HPN;CCNH
positive regulation of muscle tissue development (GO:1901863)	2/47	0.922251	1	12.8339	-3.833e-09	SOX17;FGF2
regulation of lymphocyte apoptotic process (GO:0070228)	2/49	0.932465	1	12.8827	-3.84757e-09	RORC;DOCK8
regulation of synaptic transmission, glutamatergic (GO:0051966)	2/47	0.922251	1	12.9113	-3.85609e-09	SERPINE2;GRM1
leukocyte cell-cell adhesion (GO:0007159)	2/46	0.916613	1	13.0812	-3.90685e-09	OLR1;CERCAM
neutrophil migration (GO:1990266)	2/45	0.910593	1	13.3155	-3.97681e-09	SLC37A4;ITGA1
regulation of RNA stability (GO:0043487)	1/51	0.989	1	13.5907	-4.059e-09	VEGFA
amino acid activation (GO:0043038)	1/52	0.989915	1	13.6144	-4.0661e-09	FARS2
actin filament bundle assembly (GO:0051017)	2/45	0.910593	1	13.6151	-4.0663e-09	AIF1;USH1C
tRNA aminoacylation (GO:0043039)	1/52	0.989915	1	13.618	-4.06716e-09	FARS2
regulation of alpha-beta T cell differentiation (GO:0046637)	2/42	0.890002	1	13.7651	-4.11111e-09	IL6;GLI3
cell killing (GO:0001906)	2/43	0.897312	1	13.7719	-4.11313e-09	ALB;CTSH
regulation of heart growth (GO:0060420)	2/41	0.882211	1	13.845	-4.13496e-09	FGF2;WT1
negative regulation of DNA replication (GO:0008156)	2/43	0.897312	1	13.9586	-4.16888e-09	ATR;SMC1A
negative regulation of ERBB signaling pathway (GO:1901185)	2/44	0.904168	1	13.9741	-4.17352e-09	LGMN;ITGA1
protein transmembrane transport (GO:0071806)	2/44	0.904168	1	13.986	-4.17706e-09	AZGP1;PEX5
spindle checkpoint (GO:0031577)	2/41	0.882211	1	14.0271	-4.18933e-09	PLK1;UBE2C
response to dsRNA (GO:0043331)	1/49	0.986912	1	14.0379	-4.19258e-09	SLC3A2
phagocytosis (GO:0006909)	1/48	0.985725	1	14.1137	-4.21521e-09	CD14
regulation of release of cytochrome c from mitochondria (GO:0090199)	2/41	0.882211	1	14.1451	-4.22458e-09	PYCARD;PARK2
regulation of immunoglobulin production (GO:0002637)	2/39	0.865077	1	14.1951	-4.23951e-09	IL6;CLCF1
alpha-beta T cell activation (GO:0046631)	2/40	0.873912	1	14.2845	-4.26623e-09	ATP7A;RORC
hindlimb morphogenesis (GO:0035137)	2/38	0.855677	1	14.3078	-4.27319e-09	FGF8;RARG
organelle fusion (GO:0048284)	1/49	0.986912	1	14.3199	-4.27678e-09	LRMP
pyrimidine nucleotide metabolic process (GO:0006220)	1/47	0.984429	1	14.3235	-4.27786e-09	UPP2
negative regulation of calcium ion transport (GO:0051926)	2/38	0.855677	1	14.5153	-4.33515e-09	CASQ2;CALM1
negative regulation of cyclic nucleotide metabolic process (GO:0030800)	2/37	0.845683	1	14.5262	-4.33841e-09	NPR3;PDZD3
nucleus organization (GO:0006997)	2/43	0.897312	1	14.6019	-4.36101e-09	PYGO1;MAP7
negative regulation of osteoblast differentiation (GO:0045668)	2/38	0.855677	1	14.6463	-4.37427e-09	LRP5;IGFBP5
acute-phase response (GO:0006953)	2/39	0.865077	1	14.8	-4.4202e-09	IL6;ASS1
DNA alkylation (GO:0006305)	2/42	0.890002	1	14.8669	-4.44016e-09	EZH2;HELLS
negative regulation of response to cytokine stimulus (GO:0060761)	2/36	0.835063	1	14.8685	-4.44063e-09	SLIT2;SLIT3
response to fungus (GO:0009620)	2/35	0.823786	1	14.8871	-4.44619e-09	IL25;CLEC6A
mitotic spindle checkpoint (GO:0071174)	2/36	0.835063	1	15.0074	-4.48211e-09	PLK1;UBE2C
mitochondrial electron transport, NADH to ubiquinone (GO:0006120)	1/45	0.981476	1	15.0254	-4.48749e-09	NDUFC2
negative regulation of purine nucleotide biosynthetic process (GO:1900372)	2/35	0.823786	1	15.0449	-4.49332e-09	NPR3;PDZD3
positive regulation of phagocytosis (GO:0050766)	2/35	0.823786	1	15.0582	-4.49728e-09	C4A;PYCARD
negative regulation of nucleotide biosynthetic process (GO:0030809)	2/35	0.823786	1	15.0915	-4.50724e-09	NPR3;PDZD3
ATP biosynthetic process (GO:0006754)	2/39	0.865077	1	15.1792	-4.53344e-09	SLC25A13;PKLR
nuclear envelope disassembly (GO:0051081)	2/39	0.865077	1	15.2129	-4.5435e-09	PLK1;NEK6
negative regulation of epidermal growth factor receptor signaling pathway (GO:0042059)	1/43	0.977962	1	15.4483	-4.61382e-09	ITGA1
negative regulation of cyclic nucleotide biosynthetic process (GO:0030803)	2/33	0.799135	1	15.4649	-4.61876e-09	NPR3;PDZD3
alpha-beta T cell differentiation (GO:0046632)	2/34	0.811821	1	15.4649	-4.61876e-09	ATP7A;RORC
mitotic nuclear envelope disassembly (GO:0007077)	2/37	0.845683	1	15.5165	-4.63418e-09	PLK1;NEK6
myeloid cell activation involved in immune response (GO:0002275)	2/35	0.823786	1	15.5654	-4.64879e-09	PYCARD;KIT
protein trimerization (GO:0070206)	2/35	0.823786	1	15.5921	-4.65675e-09	C1QTNF2;SKIL
regulation of DNA-dependent DNA replication (GO:0090329)	2/34	0.811821	1	15.5923	-4.6568e-09	CDC7;SMC1A
negative regulation of metaphase/anaphase transition of cell cycle (GO:1902100)	2/35	0.823786	1	15.6409	-4.67133e-09	PLK1;UBE2C
DNA strand elongation (GO:0022616)	2/35	0.823786	1	15.6753	-4.68159e-09	POLD3;GINS2
negative regulation of muscle tissue development (GO:1901862)	2/33	0.799135	1	15.7123	-4.69265e-09	FGF8;FGF3
positive regulation of multicellular organism growth (GO:0040018)	2/34	0.811821	1	15.7356	-4.6996e-09	PEX5;GHR
regulation of retinoic acid receptor signaling pathway (GO:0048385)	2/39	0.865077	1	15.749	-4.70361e-09	DHRS3;EZH2
vesicle docking (GO:0048278)	2/34	0.811821	1	15.7719	-4.71044e-09	EXOC4;STX1B
chemokine-mediated signaling pathway (GO:0070098)	2/36	0.835063	1	15.7915	-4.71631e-09	CXCR5;CCR1
glial cell development (GO:0021782)	1/40	0.971405	1	15.8336	-4.72887e-09	TSPAN2
negative regulation of response to DNA damage stimulus (GO:2001021)	1/42	0.975963	1	15.8695	-4.73961e-09	SNAI2
detection of chemical stimulus involved in sensory perception of bitter taste (GO:0001580)	2/36	0.835063	1	15.9656	-4.76829e-09	AZGP1;RTP4
negative regulation of mitotic sister chromatid separation (GO:2000816)	2/34	0.811821	1	15.9904	-4.77572e-09	PLK1;UBE2C
dendrite morphogenesis (GO:0048813)	2/34	0.811821	1	16.0126	-4.78233e-09	ATP7A;DCLK1
negative regulation of mitotic metaphase/anaphase transition (GO:0045841)	2/34	0.811821	1	16.013	-4.78246e-09	PLK1;UBE2C
positive regulation of T cell mediated immunity (GO:0002711)	2/34	0.811821	1	16.0538	-4.79463e-09	AZGP1;HSPD1
response to exogenous dsRNA (GO:0043330)	1/41	0.973783	1	16.1462	-4.82224e-09	SLC3A2
regulation of peptidyl-lysine acetylation (GO:2000756)	1/40	0.971405	1	16.2026	-4.83907e-09	SNAI2
DNA strand elongation involved in DNA replication (GO:0006271)	2/33	0.799135	1	16.2082	-4.84075e-09	POLD3;GINS2
negative regulation of transcription factor import into nucleus (GO:0042992)	2/33	0.799135	1	16.2449	-4.85171e-09	UACA;PPM1A
cyclic nucleotide biosynthetic process (GO:0009190)	2/34	0.811821	1	16.4234	-4.90503e-09	ADCY9;ADCY8
interaction with symbiont (GO:0051702)	2/33	0.799135	1	16.5345	-4.93822e-09	HPN;YTHDC2
regulation of meiotic cell cycle (GO:0051445)	1/38	0.965983	1	16.6982	-4.9871e-09	PDE3A
regulation of histone methylation (GO:0031060)	1/40	0.971405	1	16.7158	-4.99234e-09	WDR61
negative regulation of cAMP metabolic process (GO:0030815)	1/36	0.959534	1	16.8537	-5.03353e-09	NPR3
protein peptidyl-prolyl isomerization (GO:0000413)	1/41	0.973783	1	16.8629	-5.03628e-09	PPIL3
mitotic DNA integrity checkpoint (GO:0044774)	1/37	0.962898	1	16.9724	-5.069e-09	RPS27L
negative regulation of type I interferon production (GO:0032480)	1/39	0.968811	1	16.9774	-5.0705e-09	PYCARD
extrinsic apoptotic signaling pathway in absence of ligand (GO:0097192)	1/36	0.959534	1	17.1607	-5.12524e-09	ERBB3
dendrite development (GO:0016358)	1/35	0.955865	1	17.4064	-5.1986e-09	KLHL1
RNA methylation (GO:0001510)	1/37	0.962898	1	17.5244	-5.23387e-09	TRMT61B
telomere maintenance via telomere lengthening (GO:0010833)	1/36	0.959534	1	17.6629	-5.27523e-09	POLD3
regulation of interferon-beta production (GO:0032648)	1/35	0.955865	1	17.7067	-5.28829e-09	PYCARD
DNA packaging (GO:0006323)	1/36	0.959534	1	17.9609	-5.36422e-09	AIFM1
pyrimidine nucleoside biosynthetic process (GO:0046134)	1/35	0.955865	1	18.1801	-5.4297e-09	UPP2
spliceosomal snRNP assembly (GO:0000387)	1/37	0.962898	1	18.2726	-5.45732e-09	WDR77
negative regulation of nucleotide catabolic process (GO:0030812)	1/33	0.9475	1	18.698	-5.58435e-09	BCAS3
intracellular transport of virus (GO:0075733)	1/32	0.942742	1	18.7195	-5.5908e-09	VPS37B
regulation of glycoprotein metabolic process (GO:1903018)	1/33	0.9475	1	18.7986	-5.6144e-09	MGEA5
negative regulation of cAMP biosynthetic process (GO:0030818)	1/32	0.942742	1	18.853	-5.63065e-09	NPR3
negative regulation of tumor necrosis factor production (GO:0032720)	1/34	0.951864	1	19.2335	-5.74428e-09	ACP5
mitotic DNA damage checkpoint (GO:0044773)	1/32	0.942742	1	19.4274	-5.80221e-09	RPS27L
meiotic cell cycle (GO:0051321)	1/34	0.951864	1	19.4457	-5.80767e-09	RSPH1
regulation of CD4-positive, alpha-beta T cell activation (GO:2000514)	1/32	0.942742	1	19.5928	-5.8516e-09	IL6
positive regulation of muscle contraction (GO:0045933)	1/31	0.937552	1	19.5949	-5.85224e-09	F2R
dolichol-linked oligosaccharide biosynthetic process (GO:0006488)	1/34	0.951864	1	19.604	-5.85494e-09	GFPT2
C-terminal protein amino acid modification (GO:0018410)	1/32	0.942742	1	19.8972	-5.94253e-09	ATG7
activation of adenylate cyclase activity (GO:0007190)	1/32	0.942742	1	20.0823	-5.99779e-09	CALM1
regulation of natural killer cell activation (GO:0032814)	1/30	0.931892	1	20.2066	-6.03491e-09	LAMP1
7-methylguanosine RNA capping (GO:0009452)	1/32	0.942742	1	20.2425	-6.04565e-09	CCNH
positive regulation of cardiac muscle tissue development (GO:0055025)	1/29	0.925719	1	20.4515	-6.10806e-09	FGF2
regulation of cardiac muscle cell proliferation (GO:0060043)	1/29	0.925719	1	20.6117	-6.15592e-09	FGF2
muscle adaptation (GO:0043500)	1/28	0.918988	1	20.6445	-6.16569e-09	HMOX1
regulation of meiosis (GO:0040020)	1/31	0.937552	1	20.7676	-6.20248e-09	PDE3A
lens development in camera-type eye (GO:0002088)	1/30	0.931892	1	21.0398	-6.28377e-09	TGFBR1
endosome to lysosome transport (GO:0008333)	1/31	0.937552	1	21.4536	-6.40735e-09	DENND3
RNA stabilization (GO:0043489)	1/30	0.931892	1	21.4671	-6.41139e-09	VEGFA
temperature homeostasis (GO:0001659)	1/27	0.911647	1	21.628	-6.45943e-09	NR1D1
regulation of CD4-positive, alpha-beta T cell differentiation (GO:0043370)	1/28	0.918988	1	21.7341	-6.49113e-09	IL6
pyrimidine ribonucleotide metabolic process (GO:0009218)	1/29	0.925719	1	21.8044	-6.51212e-09	UPP2
regulation of defense response to virus by virus (GO:0050690)	1/29	0.925719	1	21.9186	-6.54624e-09	AP1M1
negative regulation of innate immune response (GO:0045824)	1/28	0.918988	1	21.962	-6.55918e-09	CR1
microtubule anchoring (GO:0034453)	1/29	0.925719	1	22.0826	-6.59522e-09	CEP350
cardiac muscle tissue development (GO:0048738)	1/28	0.918988	1	22.0897	-6.59733e-09	PPP1R13L
positive regulation of response to cytokine stimulus (GO:0060760)	1/25	0.894911	1	22.4066	-6.69198e-09	PARK2
positive regulation of BMP signaling pathway (GO:0030513)	1/28	0.918988	1	22.4264	-6.69788e-09	SULF1
regulation of odontogenesis (GO:0042481)	1/26	0.903641	1	22.5001	-6.7199e-09	FGF8
positive regulation of interleukin-1 production (GO:0032732)	1/27	0.911647	1	22.591	-6.74705e-09	PYCARD
establishment of spindle localization (GO:0051293)	1/26	0.903641	1	22.7011	-6.77993e-09	ARHGEF2
positive regulation of cytokine-mediated signaling pathway (GO:0001961)	1/24	0.88539	1	22.8215	-6.81589e-09	PARK2
regulation of response to interferon-gamma (GO:0060330)	1/25	0.894911	1	22.8921	-6.83699e-09	SOCS3
positive regulation of calcium-mediated signaling (GO:0050850)	1/25	0.894911	1	22.9268	-6.84734e-09	P2RX3
negative regulation of adenylate cyclase activity (GO:0007194)	1/24	0.88539	1	22.9348	-6.84974e-09	NPR3
pyrimidine ribonucleotide biosynthetic process (GO:0009220)	1/27	0.911647	1	23.0164	-6.87409e-09	UPP2
sarcomere organization (GO:0045214)	1/27	0.911647	1	23.1095	-6.9019e-09	FHOD3
positive regulation of release of cytochrome c from mitochondria (GO:0090200)	1/26	0.903641	1	23.3626	-6.9775e-09	PYCARD
T cell homeostasis (GO:0043029)	1/25	0.894911	1	23.4169	-6.99372e-09	PPP3CB
response to morphine (GO:0043278)	1/25	0.894911	1	23.5568	-7.03551e-09	GHR
positive regulation of vasoconstriction (GO:0045907)	1/26	0.903641	1	23.5931	-7.04633e-09	F2R
cardiac conduction (GO:0061337)	1/26	0.903641	1	23.595	-7.0469e-09	ANK2
pyrimidine ribonucleoside biosynthetic process (GO:0046132)	1/26	0.903641	1	23.6384	-7.05988e-09	UPP2
DNA-dependent DNA replication (GO:0006261)	1/26	0.903641	1	23.7621	-7.0968e-09	POLD3
maintenance of protein localization in organelle (GO:0072595)	1/25	0.894911	1	23.9079	-7.14035e-09	GRIK5
negative regulation of oxidoreductase activity (GO:0051354)	1/24	0.88539	1	24.0063	-7.16975e-09	HDAC6
pigment granule localization (GO:0051875)	1/26	0.903641	1	24.0857	-7.19344e-09	MLPH
regulation of excretion (GO:0044062)	1/25	0.894911	1	24.1055	-7.19938e-09	SLC9A3R1
cGMP metabolic process (GO:0046068)	1/24	0.88539	1	24.2284	-7.23608e-09	PDE10A
columnar/cuboidal epithelial cell development (GO:0002066)	1/25	0.894911	1	24.5465	-7.33109e-09	RARG
negative regulation of intrinsic apoptotic signaling pathway in response to DNA damage (GO:1902230)	1/25	0.894911	1	24.6132	-7.351e-09	SNAI2
defense response to fungus (GO:0050832)	1/23	0.875007	1	24.6389	-7.35869e-09	CLEC6A
focal adhesion assembly (GO:0048041)	1/23	0.875007	1	24.6708	-7.36819e-09	THY1
regulation of neutrophil chemotaxis (GO:0090022)	1/23	0.875007	1	24.6924	-7.37467e-09	SLIT2
gamma-aminobutyric acid signaling pathway (GO:0007214)	1/24	0.88539	1	24.7079	-7.37927e-09	PLCL2
negative regulation of GTPase activity (GO:0034260)	1/23	0.875007	1	24.7575	-7.3941e-09	BCAS3
protein K11-linked ubiquitination (GO:0070979)	1/26	0.903641	1	24.7697	-7.39775e-09	UBE2C
melanosome localization (GO:0032400)	1/25	0.894911	1	24.8733	-7.42868e-09	MLPH
termination of RNA polymerase I transcription (GO:0006363)	1/24	0.88539	1	24.8852	-7.43225e-09	CCNH
positive regulation of cardiac muscle tissue growth (GO:0055023)	1/22	0.863685	1	25.0611	-7.48477e-09	FGF2
negative regulation of production of molecular mediator of immune response (GO:0002701)	1/21	0.851338	1	25.4675	-7.60613e-09	HMOX1
negative regulation of viral transcription (GO:0032897)	1/24	0.88539	1	25.5084	-7.61836e-09	TRIM14
RNA phosphodiester bond hydrolysis, exonucleolytic (GO:0090503)	1/26	0.903641	1	25.5521	-7.63142e-09	PAN2
positive regulation of natural killer cell activation (GO:0032816)	1/22	0.863685	1	25.7519	-7.69108e-09	LAMP1
response to monoamine (GO:0071867)	1/23	0.875007	1	25.8111	-7.70875e-09	PARK2
entry into host cell (GO:0030260)	1/22	0.863685	1	25.9311	-7.74459e-09	ACE2
transcription elongation from RNA polymerase I promoter (GO:0006362)	1/23	0.875007	1	25.9521	-7.75089e-09	CCNH
vesicle fusion (GO:0006906)	1/24	0.88539	1	25.9567	-7.75226e-09	LRMP
regulation of isotype switching (GO:0045191)	1/22	0.863685	1	26.0293	-7.77394e-09	CLCF1
entry into cell of other organism involved in symbiotic interaction (GO:0051806)	1/22	0.863685	1	26.0384	-7.77665e-09	ACE2
entry into host (GO:0044409)	1/22	0.863685	1	26.0896	-7.79195e-09	ACE2
negative regulation of toll-like receptor signaling pathway (GO:0034122)	1/22	0.863685	1	26.0909	-7.79233e-09	NR1D1
modulation by virus of host morphology or physiology (GO:0019048)	1/21	0.851338	1	26.1668	-7.81501e-09	RXRA
positive regulation of CD4-positive, alpha-beta T cell differentiation (GO:0043372)	1/21	0.851338	1	26.351	-7.87e-09	IL6
acyl-CoA biosynthetic process (GO:0071616)	1/24	0.88539	1	26.3806	-7.87885e-09	ELOVL2
spinal cord motor neuron differentiation (GO:0021522)	1/23	0.875007	1	26.4674	-7.90477e-09	DYNC2H1
nucleotide-excision repair, DNA gap filling (GO:0006297)	1/22	0.863685	1	26.7046	-7.97562e-09	POLD3
regulation of interleukin-1 secretion (GO:0050704)	1/22	0.863685	1	26.7107	-7.97744e-09	PYCARD
regulation of type 2 immune response (GO:0002828)	1/23	0.875007	1	26.8684	-8.02453e-09	IL6
positive regulation of peptidyl-lysine acetylation (GO:2000758)	1/21	0.851338	1	27.0622	-8.08243e-09	SNAI2
negative regulation of cyclin-dependent protein serine/threonine kinase activity (GO:0045736)	1/22	0.863685	1	27.0809	-8.08801e-09	PLK1
regulation of T-helper cell differentiation (GO:0045622)	1/22	0.863685	1	27.0963	-8.0926e-09	IL6
positive regulation of protein acetylation (GO:1901985)	1/21	0.851338	1	27.1268	-8.10171e-09	SNAI2
inflammatory response to antigenic stimulus (GO:0002437)	1/20	0.837874	1	27.1815	-8.11804e-09	IL25
positive regulation of cardiac muscle cell proliferation (GO:0060045)	1/20	0.837874	1	27.2044	-8.12488e-09	FGF2
mRNA splice site selection (GO:0006376)	1/23	0.875007	1	27.2338	-8.13368e-09	SF3A2
regulation of keratinocyte differentiation (GO:0045616)	1/23	0.875007	1	27.4424	-8.19596e-09	VDR
N-terminal protein amino acid modification (GO:0031365)	1/20	0.837874	1	27.5973	-8.24222e-09	PPM1A
histone monoubiquitination (GO:0010390)	1/22	0.863685	1	27.7254	-8.28048e-09	UHRF1
myotube cell development (GO:0014904)	1/21	0.851338	1	27.7903	-8.29989e-09	KIAA1161
positive regulation of T cell mediated cytotoxicity (GO:0001916)	1/21	0.851338	1	27.9137	-8.33673e-09	AZGP1
protein K63-linked deubiquitination (GO:0070536)	1/20	0.837874	1	28.0888	-8.38904e-09	OTUD1
positive regulation of granulocyte chemotaxis (GO:0071624)	1/20	0.837874	1	28.1354	-8.40293e-09	S100A14
cellular response to monoamine stimulus (GO:0071868)	1/20	0.837874	1	28.181	-8.41657e-09	PARK2
cellular response to catecholamine stimulus (GO:0071870)	1/20	0.837874	1	28.3818	-8.47654e-09	PARK2
regulation of centrosome duplication (GO:0010824)	1/20	0.837874	1	28.4073	-8.48416e-09	CHORDC1
cranial nerve development (GO:0021545)	1/22	0.863685	1	28.5284	-8.52032e-09	ERBB3
ventricular septum morphogenesis (GO:0060412)	1/20	0.837874	1	28.5434	-8.52478e-09	HEY1
DNA excision (GO:0044349)	1/21	0.851338	1	28.7011	-8.5719e-09	CCNH
B cell mediated immunity (GO:0019724)	1/20	0.837874	1	28.7362	-8.58239e-09	HSPD1
nucleotide-excision repair, DNA damage removal (GO:0000718)	1/21	0.851338	1	28.7433	-8.58451e-09	CCNH
negative regulation of striated muscle cell differentiation (GO:0051154)	1/20	0.837874	1	28.7892	-8.59821e-09	EZH2
positive regulation of histone acetylation (GO:0035066)	1/19	0.823191	1	28.8996	-8.63118e-09	SNAI2
nucleoside diphosphate phosphorylation (GO:0006165)	1/21	0.851338	1	29.1215	-8.69745e-09	AK4
mitochondrial RNA metabolic process (GO:0000959)	1/20	0.837874	1	29.1251	-8.69854e-09	TRMT61B
regulation of heart rate by cardiac conduction (GO:0086091)	1/21	0.851338	1	29.2499	-8.7358e-09	ANK2
neuromuscular synaptic transmission (GO:0007274)	1/20	0.837874	1	29.3647	-8.77009e-09	P2RX3
male meiosis (GO:0007140)	1/22	0.863685	1	29.3912	-8.77801e-09	SYCP2
retina layer formation (GO:0010842)	1/19	0.823191	1	29.532	-8.82006e-09	CALB1
myoblast differentiation (GO:0045445)	1/19	0.823191	1	29.5582	-8.82788e-09	FGF6
regulation of respiratory gaseous exchange (GO:0043576)	1/21	0.851338	1	29.5851	-8.83591e-09	GLS
viral entry into host cell (GO:0046718)	1/18	0.807179	1	29.6809	-8.86451e-09	ACE2
regulation of histone H3-K4 methylation (GO:0051569)	1/20	0.837874	1	29.7358	-8.88093e-09	WDR61
regulation of mast cell activation involved in immune response (GO:0033006)	1/19	0.823191	1	29.7867	-8.89611e-09	HMOX1
regulation of antigen processing and presentation (GO:0002577)	1/18	0.807179	1	29.8555	-8.91666e-09	PYCARD
syncytium formation by plasma membrane fusion (GO:0000768)	1/19	0.823191	1	29.9463	-8.9438e-09	NEO1
spinal cord development (GO:0021510)	1/19	0.823191	1	29.9698	-8.9508e-09	SOX12
negative regulation of RNA splicing (GO:0033119)	1/19	0.823191	1	30.2702	-9.04051e-09	SAP18
positive regulation of interleukin-1 beta secretion (GO:0050718)	1/18	0.807179	1	30.2979	-9.04879e-09	PYCARD
regulation of water loss via skin (GO:0033561)	1/19	0.823191	1	30.6141	-9.14324e-09	SFN
protein localization to cell surface (GO:0034394)	1/18	0.807179	1	30.7427	-9.18164e-09	ANK2
cortical actin cytoskeleton organization (GO:0030866)	1/19	0.823191	1	30.7902	-9.19584e-09	EPB41L3
glutamate secretion (GO:0014047)	1/18	0.807179	1	31.2856	-9.34378e-09	GLS
modulation by host of viral transcription (GO:0043921)	1/20	0.837874	1	31.3403	-9.36013e-09	HPN
regulation of mast cell degranulation (GO:0043304)	1/18	0.807179	1	31.3755	-9.37062e-09	HMOX1
modulation by host of symbiont transcription (GO:0052472)	1/20	0.837874	1	31.402	-9.37854e-09	HPN
negative regulation of fatty acid metabolic process (GO:0045922)	1/18	0.807179	1	31.5878	-9.43403e-09	APOC3
skeletal muscle fiber development (GO:0048741)	1/18	0.807179	1	31.63	-9.44664e-09	KIAA1161
L-glutamate transport (GO:0015813)	1/19	0.823191	1	31.6802	-9.46163e-09	SLC25A13
cytokine biosynthetic process (GO:0042089)	1/18	0.807179	1	31.7077	-9.46984e-09	PCSK5
positive regulation of cGMP biosynthetic process (GO:0030828)	1/18	0.807179	1	32.7823	-9.7908e-09	APOE
circulatory system process (GO:0003013)	16/130	0.153085	0.76297	0.0316042	-0.00855009	SLC8A1;OLR1;ITGA1;PDE3A;SOD1;SLIT2;GCH1;MTHFR;P2RX1;MEOX2;APOE;DLL4;VEGFA;HEG1;FOXC1;HBB
dicarboxylic acid transport (GO:0006835)	9/57	0.0937492	0.6436	0.0339009	-0.0149394	SLC26A6;FOLR3;SLC25A13;SLC26A7;SLC25A10;GLS;SLC13A2;SLC22A6;SLC13A3
regulation of organ morphogenesis (GO:2000027)	18/150	0.157423	0.769904	0.0580436	-0.0151778	FGF8;HPN;MAGI2;RXRA;SIX4;SNAI2;SOX9;WT1;HOXD11;VEGFA;SULF1;ROR2;FOXC1;SOX17;FGF1;MYC;FGF3;ETV4
regulation of peptide transport (GO:0090087)	26/231	0.168932	0.779605	0.0633448	-0.0157709	FOXA2;PFKFB2;BLK;CRHBP;GLUD1;PPM1A;PDE3B;SLC16A1;NR1D1;SLC2A2;SYBU;PPP3CB;HADH;SLC30A8;PARK2;PCK2;ITPR3;CACNA2D2;ITPR2;SLC26A6;UACA;HNF4A;SYTL4;MGEA5;CA2;LRP5
microtubule-based process (GO:0007017)	35/437	0.782059	0.99661	6.1026	-0.0207242	GAS2L3;KIF4A;ULK4;DNAH5;OFD1;RSPH1;MAPT;DYNC2H1;TUBB6;TRPV4;TUBA3E;TUBG2;KIF21A;ARHGEF2;SNX29;CEP135;TTC21B;KIF5A;KIF5C;SOD1;KIF3C;CABYR;MARK1;EML4;CEP350;MAP1S;PLK1;SPAG5;TUBAL3;SPEF2;MAP7;HAUS7;SMC1A;NEK6;SRGAP2
cellular protein complex assembly (GO:0043623)	20/256	0.768399	0.996598	6.15211	-0.0209631	MICALL2;COX14;MTSS1;AIF1;AIFM1;COA1;SYNJ1;ALDOB;UBE2C;MSRB2;DAB2;PRLR;TUBAL3;TUBB6;TGFBR3;TRPV4;TUBA3E;PDGFC;HSPD1;CASQ2
protein autophosphorylation (GO:0046777)	13/170	0.759339	0.996598	6.25138	-0.0213013	IRAK1;IGF1R;FLT1;TNIK;TRPM7;CAMK2G;PDGFRB;ATR;KIT;EPHB3;MAP3K13;NEK6;KDR
response to unfolded protein (GO:0006986)	10/135	0.772443	0.996598	6.58537	-0.0224394	DDX11;TPP1;HSPA4L;PDIA5;GOSR2;HSPE1;PARK2;DNAJB1;HSPD1;WIPI1
regulation of microtubule-based process (GO:0032886)	9/124	0.783382	0.99661	6.809	-0.0231232	LAMP1;ARHGEF2;SPAG5;MAPT;STMN4;TRPV4;CHORDC1;EML4;HDAC6
stem cell maintenance (GO:0019827)	8/109	0.764358	0.996598	6.82866	-0.0232684	TFAP2C;CDH2;KIT;SOX9;SMC1A;PRDM16;MED10;LRP5
ribonucleoside biosynthetic process (GO:0042455)	8/110	0.772488	0.996598	7.08184	-0.0241311	ADSSL1;SLC25A13;PANK1;PKLR;AK2;UPP2;AK4;NT5E
regulation of T cell differentiation (GO:0045580)	7/97	0.769482	0.996598	7.3842	-0.0251613	IL6;FOXJ1;DTX1;VNN1;RORC;SOD1;GLI3
cell-cell junction assembly (GO:0007043)	11/77	0.110994	0.666876	0.063378	-0.0256777	PARD6A;MICALL2;EPB41L3;CLDN9;ANK2;TLN2;MPP5;HEG1;TRPV4;PTPRO;CLDN14
regulation of myeloid leukocyte differentiation (GO:0002761)	7/98	0.777957	0.99661	7.60828	-0.0258375	TESC;CCR1;FSTL3;CA2;PRDM16;MYC;PIK3R1
Fc-epsilon receptor signaling pathway (GO:0038095)	23/295	0.784061	0.99661	7.79601	-0.026475	FGF6;FGF18;FGF8;PDGFB;ERBB3;KL;KIT;MAPK10;ITPR3;ITPR2;MAPKAP1;PLCG2;PPP3CB;PDGFRB;MAPK8;FGF1;THEM4;NFATC3;FGF2;TNRC6A;PIK3R1;FGF3;CALM1
regulation of interleukin-6 production (GO:0032675)	6/84	0.767195	0.996598	7.90131	-0.0269234	IL6;ARHGEF2;FOXJ1;PYCARD;HSPD1;F2R
cellular response to unfolded protein (GO:0034620)	6/86	0.785163	0.99661	8.00984	-0.0272012	DDX11;TPP1;PDIA5;GOSR2;PARK2;WIPI1
nucleoside monophosphate biosynthetic process (GO:0009124)	6/85	0.776315	0.99661	8.08566	-0.0274587	ADSSL1;SLC25A13;PKLR;AK2;UPP2;AK4
regulation of extrinsic apoptotic signaling pathway (GO:2001236)	19/161	0.164849	0.771284	0.108215	-0.0281032	SH3RF1;AR;ARHGEF2;TNFRSF12A;TGFBR1;BIRC6;STRADB;SNAI2;DAB2;ITGA6;TRPS1;HMOX1;VEGFA;SERPINE1;PYCARD;G0S2;SKIL;BMPR1B;ACVR1
striated muscle contraction (GO:0006941)	5/71	0.766112	0.996598	8.27552	-0.0281985	SLC8A1;ANK2;MYL3;PPP1R13L;CASQ2
single-organism nuclear import (GO:1902593)	5/71	0.766112	0.996598	8.32497	-0.028367	IPO13;TRPS1;ING1;PIK3R1;F2R
spermatogenesis (GO:0007283)	29/353	0.719541	0.994853	5.57489	-0.028766	TSPY3;ACOX1;TSPY1;USP9Y;DZIP1;TSPY4;FSTL3;KIT;SOX9;GPX4;SERPINA5;PCYT1B;SKIL;SOX17;INPP5B;ASPM;ADAM28;FOXJ1;ZFX;CCDC135;HERC4;SOD1;RBMY1B;RBMY1F;SSTR1;SPEF2;BPY2;MAP7;CTSH
male gamete generation (GO:0048232)	29/354	0.724666	0.994853	5.60683	-0.0289308	TSPY3;ACOX1;TSPY1;USP9Y;DZIP1;TSPY4;FSTL3;KIT;SOX9;GPX4;SERPINA5;PCYT1B;SKIL;SOX17;INPP5B;ASPM;ADAM28;FOXJ1;ZFX;CCDC135;HERC4;SOD1;RBMY1B;RBMY1F;SSTR1;SPEF2;BPY2;MAP7;CTSH
antigen processing and presentation (GO:0019882)	18/225	0.726541	0.994853	5.62476	-0.0290233	SEC23A;KIF4A;AP1M1;RAB3C;KIF5A;LGMN;UNC93B1;FCGRT;KIF3C;HLA-DQA1;PSMB4;AZGP1;BLMH;OSBPL1A;CTSE;DYNC2H1;SAR1B;CTSH
smoothened signaling pathway (GO:0007224)	5/72	0.776003	0.99661	8.6541	-0.0293891	GPR162;WDPCP;TTC21B;CC2D2A;GLI3
cell-cell adhesion via plasma-membrane adhesion molecules (GO:0098742)	15/190	0.731361	0.994853	5.75345	-0.0296874	PTPRD;CLDN9;CLSTN2;PCDH11Y;PCDH11X;CLDN5;CDHR2;CDHR5;PCDH15;CDH2;CLDN14;FREM2;CLDN2;CEACAM1;CDH11
regulation of nuclease activity (GO:0032069)	5/72	0.776003	0.99661	8.75734	-0.0297397	DDX11;TPP1;PDIA5;GOSR2;WIPI1
cytosolic calcium ion homeostasis (GO:0051480)	14/176	0.716999	0.994853	5.84445	-0.0301569	SLC8A1;CCR1;PTH1R;ITPR3;CCL28;CALB1;GRM1;PLCE1;CUL5;PLCG2;DLG4;TRPV4;FGF2;F2R
protein processing (GO:0016485)	23/201	0.168221	0.777957	0.121224	-0.0304374	AIFM1;TNFSF15;MME;VPS37B;RPS27L;ANPEP;ENPEP;BCL2L13;GLI3;MAP3K5;P2RX1;REN;KLKB1;APOH;ACE2;DYNC2H1;CTSE;PYCARD;HSPE1;HSPD1;PCSK5;CTSH;F2R
positive regulation of cytosolic calcium ion concentration (GO:0007204)	12/152	0.716542	0.994853	5.91813	-0.0305371	PLCE1;SLC8A1;CCR1;PTH1R;PLCG2;DLG4;TRPV4;ITPR3;CCL28;GRM1;FGF2;F2R
protein acylation (GO:0043543)	12/154	0.73182	0.994853	5.91902	-0.0305417	NAT8B;ESCO1;ZDHHC14;NAT8;ZDHHC6;KANSL2;EHHADH;ZDHHC9;MGEA5;PPM1A;MBD3;PCK1
neurotrophin TRK receptor signaling pathway (GO:0048011)	30/274	0.182349	0.78572	0.128531	-0.0309959	FGF6;FGF18;FGF8;PDGFB;ERBB3;ADCY8;KIT;MAPKAP1;FGF1;PCSK5;TNRC6A;FGF2;FGF3;PIK3R1;NET1;IRAK1;ARHGEF3;ARHGEF2;KL;ARHGEF9;ITPR3;ARHGEF12;ITPR2;RPS6KA3;ADCY9;RASGRF2;PDGFRB;MAPK8;THEM4;CALM1
response to topologically incorrect protein (GO:0035966)	11/143	0.740367	0.994853	6.0829	-0.0313873	DDX11;TPP1;HSPA4L;PDIA5;GOSR2;HSPE1;PARK2;DNAJB1;HSPD1;WIPI1;HDAC6
positive regulation of GTPase activity (GO:0043547)	44/482	0.499664	0.988946	2.84117	-0.0315803	ALS2;EZH2;IQGAP3;IQGAP2;ITSN2;DENND2A;TBC1D19;RGL1;RASAL1;RASGRP3;TBC1D14;ARHGAP42;ARHGAP11A;AGRN;BCAS3;DOCK10;DENND5B;IQSEC1;NET1;ARHGEF3;ARHGEF2;ARHGEF38;FOXJ1;ARHGAP28;DENND1A;DOCK8;ARHGEF9;DOCK5;HERC1;ARHGEF12;EPHA2;THY1;FARP2;ARHGAP31;PLCE1;ARHGAP32;SH2D3A;RASGRF2;RIN2;DENND3;SRGAP1;EPS8L1;SRGAP2;ARHGAP10
cell division (GO:0051301)	10/131	0.742	0.994853	6.18731	-0.031926	PARD6A;CDC7;CDC14A;CCND3;SPAG5;SPG20;POU3F3;KIT;CDK14;ASPM
positive regulation of canonical Wnt signaling pathway (GO:0090263)	4/59	0.777966	0.99661	9.54215	-0.0324048	ROR2;RNF146;ASPM;CAPRIN2
negative regulation of MAPK cascade (GO:0043409)	10/130	0.733977	0.994853	6.29741	-0.0324941	IGF1R;ANKRD26;DUSP2;APOE;HIPK3;PARK2;SPRED1;DUSP9;SLC9A3R1;MYC
ER to Golgi vesicle-mediated transport (GO:0006888)	4/60	0.788395	0.99661	9.63127	-0.0327075	SEC23A;ATL2;GOSR2;SAR1B
positive regulation of chemotaxis (GO:0050921)	12/90	0.137785	0.733379	0.106157	-0.0329185	SEMA5A;IL6;PDGFB;AIF1;CCR1;C5;VEGFA;SERPINE1;PDGFRB;S100A14;SLIT2;KDR
regulation of peptide secretion (GO:0002791)	22/192	0.173161	0.78572	0.136726	-0.0329721	FOXA2;GLUD1;CRHBP;BLK;PFKFB2;PDE3B;PARK2;ITPR3;PCK2;CACNA2D2;ITPR2;SLC16A1;HNF4A;NR1D1;SLC2A2;SYBU;MGEA5;PPP3CB;SYTL4;SLC30A8;HADH;LRP5
intrinsic apoptotic signaling pathway (GO:0097193)	16/170	0.477565	0.988946	3.03409	-0.0337246	FHIT;PDK2;AIFM1;EDA2R;RRP8;RPS27L;SFN;EPHA2;FNIP2;MAP3K5;CUL5;UACA;HMOX1;PYCARD;MAPK8;PIK3R1
macromolecule glycosylation (GO:0043413)	24/264	0.521645	0.988946	3.11814	-0.0346588	SEC23A;MAN1A2;GALNT6;FUT6;MAN1C1;ST6GALNAC2;ST3GAL1;ST6GALNAC3;ST8SIA6;MLEC;ST3GAL6;GFPT2;B4GALNT2;ENTPD5;B3GNT3;SAR1B;LRP2;GALNT11;B4GALT4;MUC13;GALNT13;C1GALT1;MUC12;B4GALT5
actin filament organization (GO:0007015)	14/150	0.495933	0.988946	3.14981	-0.0350109	MICALL2;MTSS1;ARHGEF2;AIF1;PDXP;IQGAP2;PCDH15;MSRB2;SORBS2;FHOD3;TRPV4;USH1C;WIPF1;DBN1
hydrogen ion transmembrane transport (GO:1902600)	8/108	0.756021	0.994853	6.81264	-0.0351527	ATP6V1C2;SLC36A1;ATP6V0A1;CYB5A;ATP6V1G3;ATP6V1B2;SLC47A1;ATP6V0D2
regulation of leukocyte mediated immunity (GO:0002703)	9/120	0.752484	0.994853	6.83764	-0.0352817	LAMP1;AZGP1;CR1;CLCF1;FOXJ1;HMOX1;PPP3CB;HSPD1;CD226
positive regulation of hormone secretion (GO:0046887)	7/91	0.713689	0.994853	6.87354	-0.0354669	GLUD1;PFKFB2;BLK;MGEA5;PPP3CB;SLC30A8;PCK2
membrane depolarization (GO:0051899)	8/106	0.738729	0.994853	6.88996	-0.0355517	SLC8A1;ANK2;DLG4;GRIK5;SCN9A;SCN7A;STX1B;TPCN1
fatty acid derivative metabolic process (GO:1901568)	12/88	0.12409	0.698781	0.0993415	-0.0356058	ACOX1;PTGIS;PTGES;CYP2C8;GPX4;EPHX2;MGLL;CYP4F3;CYP4F2;HPGD;DPEP1;MGST2
negative regulation of sequence-specific DNA binding transcription factor activity (GO:0043433)	12/126	0.476193	0.988946	3.20923	-0.0356714	IRAK2;IRAK1;IGF1R;PTGIS;FOXA2;FOXJ1;HMOX1;PYCARD;COMMD1;PBX1;CAT;PRNP
negative regulation of protein modification process (GO:0031400)	37/407	0.513412	0.988946	3.20986	-0.0356784	ENPP1;IMPACT;SFN;PBLD;GPD1L;PSMB4;IGF1R;PPP1R1B;APOE;PYCARD;SPRED1;PPAP2B;TESC;IL6;SOCS3;MLXIPL;WNK1;CRIPAK;PARK2;UBE2C;PKIA;CAMK2N1;SLIT2;THY1;PPM1E;DUSP2;NXN;PLK1;HIPK3;MGEA5;DUSP9;PRNP;GADD45B;CHORDC1;GADD45A;LRP5;CALM1
carbohydrate derivative biosynthetic process (GO:1901137)	34/377	0.53293	0.988946	3.21037	-0.035684	GAL3ST3;ADCY8;LUM;UGDH;UPP2;DCN;ST3GAL1;SLC35D1;GPC6;ST3GAL6;DSEL;B3GNT3;AGRN;NT5E;B4GALT4;B4GALT5;ADSSL1;AK2;AK4;CHST5;CERCAM;GLCE;CWH43;ATP7A;SLC25A13;ADCY9;ST8SIA6;PANK1;RRM2;PKLR;GFPT2;PDGFRB;HAS2;UGP2
ribonucleoside monophosphate catabolic process (GO:0009158)	30/332	0.530042	0.988946	3.21328	-0.0357164	ABCA8;KIF4A;ENPP1;ABCA1;ABCA4;DNAH5;ABCA5;DDX11;DDX3Y;DYNC2H1;PMS2;DDX10;KIF21A;NT5E;DDX43;ABCA13;MSH3;KIF5A;CCNH;MSH5;KIF5C;YTHDC2;HLTF;KIF3C;ABCG1;DHX29;ABCC2;HSPD1;DDX53;ABCC6
response to radiation (GO:0009314)	40/442	0.523095	0.988946	3.2272	-0.0358711	GPR162;LDLR;MME;KIT;ABCA4;TTR;HOXA1;PPP1R1B;APOE;GPC6;APOC3;STRA6;AGRN;CAT;MYC;ANGPT2;PIK3R1;NET1;NOX4;TRPM3;LRRN4;ASIC2;ATR;SNAI2;CNGA1;NABP1;CYP17A1;DHRS3;UACA;NEDD4;TXN;MAPK8;SCARA3;LRP2;OGG1;SMC1A;GADD45A;NHEJ1;TP53INP1;CALM1
cellular response to topologically incorrect protein (GO:0035967)	7/92	0.723578	0.994853	6.97664	-0.0359989	DDX11;TPP1;PDIA5;GOSR2;PARK2;WIPI1;HDAC6
purine nucleoside monophosphate catabolic process (GO:0009128)	30/333	0.536383	0.988946	3.23927	-0.0360052	ABCA8;KIF4A;ENPP1;ABCA1;ABCA4;DNAH5;ABCA5;DDX11;DDX3Y;DYNC2H1;PMS2;DDX10;KIF21A;NT5E;DDX43;ABCA13;MSH3;KIF5A;CCNH;MSH5;KIF5C;YTHDC2;HLTF;KIF3C;ABCG1;DHX29;ABCC2;HSPD1;DDX53;ABCC6
regulation of protein stability (GO:0031647)	13/138	0.486484	0.988946	3.28573	-0.0365216	TESC;HPS4;MYLIP;CPN2;LAMP1;A1CF;ANK2;PLK1;PYCARD;SOX17;HSPD1;PPAP2B;CTSH
microtubule-based movement (GO:0007018)	15/187	0.710513	0.993589	5.7007	-0.0366632	KIF4A;SNX29;TTC21B;KIF5A;KIF5C;ULK4;SOD1;KIF3C;DNAH5;CABYR;OFD1;MAP1S;MAPT;DYNC2H1;KIF21A
cell projection assembly (GO:0030031)	24/213	0.179123	0.78572	0.153172	-0.0369381	MTSS1;GPR162;CCDC88A;PDGFB;AIF1;FOXJ1;ABLIM3;DZIP1;B9D2;ITGB4;PCDH15;KIT;SLC9A3R1;ATP6V1D;PTPRO;OFD1;WDPCP;ITGA6;TMEM138;RSPH1;CC2D2A;DYNC2H1;SPEF2;SRGAP2
negative regulation of ion transmembrane transport (GO:0034766)	3/45	0.772131	0.996598	10.9026	-0.0371503	SLC9A3R1;CASQ2;CALM1
purine ribonucleoside biosynthetic process (GO:0046129)	7/95	0.751829	0.994853	7.22343	-0.0372724	ADSSL1;SLC25A13;PANK1;PKLR;AK2;AK4;NT5E
negative regulation of developmental growth (GO:0048640)	3/46	0.784133	0.99661	10.9853	-0.0373058	SEMA5A;SPG20;SLIT2
multicellular organismal homeostasis (GO:0048871)	3/44	0.759589	0.996598	10.9492	-0.037309	NR1D1;PPP1R13L;SLC40A1
learning (GO:0007612)	11/115	0.475664	0.988946	3.36031	-0.0373506	GPR162;NLGN4Y;LRRN4;PPP1R1B;SYNJ1;PPP3CB;DLG4;STRA6;PARK2;KIT;EPHB2
cell cycle arrest (GO:0007050)	13/140	0.506073	0.988946	3.37722	-0.0375386	GAS2L3;PPP2R3B;MAGI2;TGFBR1;RPRM;PPM1A;STRADB;CUL5;SKIL;PRNP;GADD45A;MYC;TP53INP1
cellular response to abiotic stimulus (GO:0071214)	21/232	0.53194	0.988946	3.39022	-0.0376831	SLC12A6;NOX4;TRPM3;ADSSL1;ARHGEF2;MME;ATR;SNAI2;SOX9;GRM1;CNGA1;NEDD4;SFTPC;TRPV4;MAPK8;MYC;GADD45A;PIK3R1;TP53INP1;NET1;CALM1
microtubule-based transport (GO:0010970)	7/95	0.751829	0.994853	7.38661	-0.0381143	KIF4A;MAP1S;TTC21B;MAPT;DYNC2H1;SOD1;KIF3C
hemopoiesis (GO:0030097)	7/95	0.751829	0.994853	7.38713	-0.038117	PDGFB;SLC37A4;TGFBR3;PBX1;KIT;MEIS1;KDR
cellular potassium ion transport (GO:0071804)	12/129	0.506867	0.988946	3.45358	-0.0383873	SLC12A6;KCNJ15;HPN;KCNK5;KCNH6;KCNK13;KCNQ2;KCNJ12;KCNV1;CNGA1;KCNMB1;KCNK10
regulation of cellular amine metabolic process (GO:0033238)	6/82	0.748135	0.994853	7.47993	-0.0385959	PSMB4;HPN;LDLR;BHMT;MAOB;NR1H4
regulation of DNA-templated transcription, elongation (GO:0032784)	3/44	0.759589	0.996598	11.3514	-0.0386793	DAB2;WDR61;EZH2
regulation of transmembrane transporter activity (GO:0022898)	13/141	0.515799	0.988946	3.4813	-0.0386954	TESC;CRHBP;SLC9A3R1;GPD1L;ANK2;RASGRF2;NEDD4;ANK3;PLCG2;DLG4;CASQ2;GLRX;CALM1
positive regulation of homeostatic process (GO:0032846)	12/130	0.516991	0.988946	3.50361	-0.0389434	ACOX1;F2RL3;TFRC;NR1D1;HNF4A;P2RX3;MGEA5;PPP3CB;CA2;SLC22A5;F2R;THY1
regulation of T cell mediated immunity (GO:0002709)	3/46	0.784133	0.99661	11.4701	-0.0389521	AZGP1;PPP3CB;HSPD1
positive regulation of protein import into nucleus (GO:0042307)	6/80	0.72797	0.994853	7.57315	-0.0390769	SEMA5A;DAB2;IL6;UACA;TGFBR1;GLI3
pyrimidine-containing compound metabolic process (GO:0072527)	6/81	0.738191	0.994853	7.62236	-0.0393308	ALDH6A1;UPB1;DPYS;UPP2;AGXT2;NT5E
nucleoside monophosphate catabolic process (GO:0009125)	30/335	0.548998	0.988946	3.54156	-0.0393652	ABCA8;KIF4A;ENPP1;ABCA1;ABCA4;DNAH5;ABCA5;DDX11;DDX3Y;DYNC2H1;PMS2;DDX10;KIF21A;NT5E;DDX43;ABCA13;MSH3;KIF5A;CCNH;MSH5;KIF5C;YTHDC2;HLTF;KIF3C;ABCG1;DHX29;ABCC2;HSPD1;DDX53;ABCC6
response to retinoic acid (GO:0032526)	14/111	0.153521	0.76297	0.146949	-0.039755	TESC;RARG;RXRA;ABCA1;SOX9;CYP17A1;WNT7B;SERPINF1;PTGES;APOE;SFTPC;PDGFRB;MAP7;CTSH
hormone biosynthetic process (GO:0042446)	3/44	0.759589	0.996598	11.6754	-0.0397833	CYP17A1;DIO1;SCP2
myeloid cell differentiation (GO:0030099)	14/154	0.533317	0.988946	3.61642	-0.0401974	EPAS1;IL25;SFXN1;KIT;OSTM1;EPHA2;FARP2;IL11;DAB2;TFRC;VEGFA;SLC25A38;TGFBR3;MT1G
cilium assembly (GO:0042384)	11/118	0.507741	0.988946	3.65672	-0.0406453	GPR162;WDPCP;TMEM138;FOXJ1;ABLIM3;DZIP1;B9D2;CC2D2A;DYNC2H1;PCDH15;ATP6V1D
actin filament-based process (GO:0030029)	27/303	0.559234	0.988946	3.66307	-0.0407158	GAS2L3;MTSS1;MYBPC2;PDGFB;MYL3;UTY;ABLIM3;KIT;KLHL1;DES;TRPV4;WIPF1;CNN1;IQSEC1;MICALL2;TNIK;PHACTR4;TRPM7;FOXJ1;SLC9A3R1;FARP2;EPB41L3;NPHS2;FHOD3;PDGFRB;TMSB4Y;SRGAP2
negative regulation of cell projection organization (GO:0031345)	10/106	0.497545	0.988946	3.66337	-0.0407192	SEMA5A;APOE;SPG20;TRPV4;SPOCK1;PTPRO;RUFY3;SLIT2;THY1;EPHB2
epidermis development (GO:0008544)	11/120	0.528826	0.988946	3.67809	-0.0408828	PPARA;IGF1R;BTD;PLOD1;EDA2R;FZD3;LAMC2;TFAP2C;APCDD1;SOX9;ALDH3A2
ATP catabolic process (GO:0006200)	29/327	0.569193	0.988946	3.68183	-0.0409244	ABCA8;KIF4A;ENPP1;ABCA1;ABCA4;DNAH5;ABCA5;DDX11;DDX3Y;DYNC2H1;PMS2;DDX10;KIF21A;DDX43;ABCA13;MSH3;KIF5A;CCNH;MSH5;KIF5C;YTHDC2;HLTF;KIF3C;ABCG1;DHX29;HSPD1;ABCC2;DDX53;ABCC6
negative regulation of protein maturation (GO:1903318)	28/316	0.570717	0.988946	3.7426	-0.0415998	SH3RF1;FHIT;C5;CD109;SPOCK1;SFN;SERPINE2;SERPINA6;SERPINA5;SERPINA4;SERPINE1;DPEP1;CR1;IL6;C4A;BIRC6;UBE2C;SERPINI1;RPS6KA3;SERPINF1;PLK1;CPAMD8;VEGFA;SERPINB7;SLPI;FABP1;PROS1;HDAC6
protein secretion (GO:0009306)	5/67	0.723247	0.994853	8.15303	-0.042069	GNPTAB;CHI3L1;ABCA1;PCSK5;OLFM2
positive regulation of growth (GO:0045927)	17/189	0.545626	0.988946	3.78528	-0.0420743	FGF8;HPN;TNFRSF12A;TGFBR1;PEX5;SFN;CACNA2D2;WT1;SEMA5A;RPS6KA3;APOE;MAPT;VEGFA;AGRN;FGF2;GHR;ISLR2
positive regulation of JNK cascade (GO:0046330)	10/107	0.508714	0.988946	3.83341	-0.0426092	DAB2;WNT7B;MAP3K5;TNIK;PYCARD;EDA2R;ZEB2;GADD45B;FZD5;GADD45A
regulation of protein targeting (GO:1903533)	15/167	0.549487	0.988946	3.93878	-0.0437804	IL6;TGFBR1;PPM1A;SNAI2;PKIA;GLI3;PBLD;SEMA5A;DAB2;UACA;APOD;ANK3;TXN;OGG1;PDZK1
regulation of developmental growth (GO:0048638)	12/133	0.546983	0.988946	3.9528	-0.0439362	SEMA5A;TNFRSF12A;APOE;MAPT;VEGFA;SPG20;SIX4;AGRN;FGF2;SLIT2;WT1;ISLR2
neuron projection guidance (GO:0097485)	39/367	0.187758	0.78572	0.182405	-0.043988	KIF4A;FGF8;PLXNC1;ABLIM3;EFNA3;NEO1;EPHB3;GLI3;EPHB2;ALCAM;SEMA5A;HOXA1;ANK2;ANK3;PGRMC1;LHX3;DLG4;AGRN;KCNQ2;ETV4;KIF5A;KIF5C;ITGA1;FZD3;ARHGEF12;PTPRO;SLIT2;SLIT3;FARP2;RPS6KA3;VEGFA;MNX1;SPTBN1;BMPR1B;PRNP;SRGAP1;CHL1;SRGAP2;FEZ1
regulation of protein localization to nucleus (GO:1900180)	14/156	0.551693	0.988946	3.96665	-0.0440902	SEMA5A;DAB2;IL6;UACA;APOD;TRIM29;TGFBR1;TXN;PPM1A;SNAI2;OGG1;GLI3;PKIA;PBLD
glycosylation (GO:0070085)	24/273	0.584482	0.988946	3.98909	-0.0443397	SEC23A;MAN1A2;GALNT6;FUT6;MAN1C1;ST6GALNAC2;ST3GAL1;ST6GALNAC3;ST8SIA6;MLEC;ST3GAL6;GFPT2;B4GALNT2;ENTPD5;B3GNT3;SAR1B;LRP2;GALNT11;B4GALT4;MUC13;GALNT13;C1GALT1;MUC12;B4GALT5
phototransduction, visible light (GO:0007603)	12/89	0.130838	0.722482	0.136693	-0.0444339	TTR;DHRS3;LDLR;APOE;GPC6;APOC3;STRA6;AGRN;ABCA4;LRP2;CNGA1;CALM1
regulation of blood circulation (GO:1903522)	18/204	0.575948	0.988946	4.00551	-0.0445222	SCPEP1;SLC8A1;IRX5;EPAS1;MYL3;ASIC2;EPHX2;KCNJ12;GPD1L;DES;P2RX1;ANK2;P2RY2;HMOX1;ACE2;CASQ2;F2R;CALM1
positive regulation of kinase activity (GO:0033674)	50/480	0.185899	0.78572	0.184948	-0.0446011	ALS2;PDGFB;ADCY8;EZH2;TNFSF15;IQGAP3;ZEB2;PDIA5;MAP3K5;DAB2;DDX11;TPP1;PDGFC;FGF2;GHR;IRAK2;IRAK1;TNIK;CCDC88A;GRM1;PLCE1;MAP3K15;CCND3;TXN;VEGFA;PDGFRB;GADD45B;GADD45A;MAP3K13;ERBB3;PFKFB2;C5;KIT;C1QTNF2;NOX4;FLT1;TGFBR1;CHI3L1;ITGA1;MAPK10;STRADB;FZD5;SOD1;WIPI1;WNT7B;PRLR;ADCY9;GOSR2;CALM1;F2R
protein N-linked glycosylation via asparagine (GO:0018279)	9/96	0.509812	0.988946	4.07652	-0.0453114	SEC23A;MAN1A2;ST8SIA6;MLEC;GFPT2;SAR1B;MAN1C1;B4GALT4;B4GALT5
inflammatory response (GO:0006954)	33/376	0.593132	0.988946	4.08318	-0.0453855	TSPAN2;ASS1;AIF1;CCR1;CRHBP;C5;KIT;PTGES;APOC3;SCN9A;PYCARD;MGLL;VNN1;LIAS;NFATC3;IRAK2;NOX4;IL6;C4A;OLR1;KL;LYZ;IL25;EPHX2;CHI3L1;CDO1;CCL18;BMPR1B;OGG1;IGFBP4;CD14;F2R;ACVR1
positive regulation of ossification (GO:0045778)	8/83	0.485926	0.988946	4.09329	-0.0454978	IL6;WNT7B;HEY1;KL;FAM20C;BMPR1B;GLI3;ACVR1
protein localization to membrane (GO:0072657)	24/276	0.604754	0.988946	4.10362	-0.0456127	TESC;RTP4;MAGI2;OSBPL8;GRIK5;PEX5;PLEKHF1;EPB41L3;RAB31;GPHN;RPS28;KRT18;ANK2;APOE;ANK3;MGEA5;DLG4;RPS4Y1;SPTBN1;MAP7;AGRN;SCP2;GOLGA4;EHD3
specification of symmetry (GO:0009799)	4/54	0.719667	0.994853	8.89759	-0.0459109	DYNC2H1;GALNT11;RTTN;ACVR1
taxis (GO:0042330)	23/263	0.59352	0.988946	4.17696	-0.0464278	FGF8;PLD1;IL6;FLT1;PDGFB;CCR1;C5;SLC37A4;ITGA1;KIT;CCL28;PTPRO;CCL18;EPHA2;SLIT2;SLIT3;SEMA5A;CXCR5;VEGFA;PDGFRB;HOXB9;ANO6;FGF2
actomyosin structure organization (GO:0031032)	4/57	0.755894	0.994853	9.16168	-0.0472735	TRPM7;FHOD3;PDGFRB;CNN1
positive regulation of nuclease activity (GO:0032075)	5/66	0.711694	0.994292	8.26104	-0.04729	DDX11;TPP1;PDIA5;GOSR2;WIPI1
negative regulation of cysteine-type endopeptidase activity (GO:2000117)	7/71	0.471941	0.988946	4.25579	-0.0473041	SH3RF1;RPS6KA3;IL6;VEGFA;FABP1;SFN;DPEP1
striated muscle tissue development (GO:0014706)	8/85	0.511069	0.988946	4.28854	-0.0476681	SRPK3;TCF21;MEOX2;MYL3;SIX4;DCN;SKIL;PPP1R13L
fatty acid biosynthetic process (GO:0006633)	10/111	0.552593	0.988946	4.30656	-0.0478684	ACSM3;PTGIS;PTGES;ELOVL2;PTPLA;MGLL;CBR4;THNSL2;LIAS;MGST2
regulation of reproductive process (GO:2000241)	8/86	0.52349	0.988946	4.38041	-0.0486893	SERPINF1;RXRA;WDR77;SULF1;PDE3A;EAF2;SOX9;WT1
regulation of heart rate (GO:0002027)	7/72	0.485581	0.988946	4.39159	-0.0488136	GPD1L;SLC8A1;IRX5;EPAS1;ANK2;CASQ2;CALM1
potassium ion transport (GO:0006813)	13/151	0.609387	0.988946	4.40659	-0.0489803	SLC12A6;KCNJ15;SLC12A7;HPN;KCNJ12;KCNK13;KCNMB1;CNGA1;KCNV1;KCNK10;KCNK5;KCNH6;KCNQ2
regulation of multicellular organism growth (GO:0040014)	7/72	0.485581	0.988946	4.41506	-0.0490744	ANKRD26;AGPAT6;LGMN;PEX5;SOD1;CACNA2D2;GHR
negative regulation of protein complex disassembly (GO:0043242)	4/56	0.744239	0.994853	9.53609	-0.0492055	ARHGEF2;SPTBN1;EML4;HDAC6
protein-DNA complex assembly (GO:0065004)	10/113	0.573959	0.988946	4.43117	-0.0492535	TSPYL1;TSPY3;HIST1H2BB;TSPY1;TSPY4;HIST1H2BH;SOX12;DACH1;SLC30A8;SOX9
regulation of intracellular protein transport (GO:0033157)	19/219	0.604001	0.988946	4.45647	-0.0495347	IL6;TGFBR1;PPM1A;SFN;SNAI2;GLI3;PKIA;PBLD;SEMA5A;DAB2;UACA;APOD;ANK3;TXN;ANXA13;LYPLAL1;BCAS3;OGG1;PDZK1
regulation of protein secretion (GO:0050708)	14/161	0.596441	0.988946	4.46212	-0.0495974	RHBDF2;TNFRSF21;IL6;ACHE;IL1RL1;C5;RHBDF1;TNFSF15;CD58;PYCARD;SYTL4;CLEC6A;CD14;F2R
regulation of BMP signaling pathway (GO:0030510)	7/73	0.499117	0.988946	4.48058	-0.0498027	SKOR1;CHRDL1;TRIM33;HTRA1;SULF1;SPG20;FSTL3
cilium organization (GO:0044782)	11/125	0.580125	0.988946	4.51966	-0.050237	GPR162;WDPCP;TMEM138;FOXJ1;ABLIM3;DZIP1;B9D2;CC2D2A;DYNC2H1;PCDH15;ATP6V1D
central nervous system neuron differentiation (GO:0021953)	8/87	0.535798	0.988946	4.52939	-0.0503452	ATP7A;HOXA1;MDGA1;LHX3;DYNC2H1;PEX5;SPOCK1;HERC1
positive regulation of NF-kappaB transcription factor activity (GO:0051092)	11/126	0.590098	0.988946	4.53598	-0.0504185	IRAK2;IRAK1;AR;IL6;ARHGEF2;PYCARD;TRIM14;EDA2R;TGFBR3;CAT;MAP3K13
multi-organism reproductive process (GO:0044703)	12/140	0.614088	0.988946	4.54849	-0.0505576	MAFF;P2RX1;PPP1R1B;PAPPA;CLIC5;CRHBP;SEMG2;ZFX;ABAT;SEPP1;DDO;HPGD
apoptotic signaling pathway (GO:0097190)	28/327	0.638957	0.988946	4.56535	-0.0507449	FHIT;TNFRSF12A;ERBB3;RPS27L;SFN;MAP3K5;CUL5;PTGIS;HMOX1;PYCARD;PIK3R1;NET1;ARHGEF3;PDK2;ARHGEF2;AIFM1;EDA2R;RRP8;ARHGEF9;ARHGEF12;EPHA2;FNIP2;LAMP1;KRT18;UACA;RASGRF2;MAPK8;G0S2
Rho protein signal transduction (GO:0007266)	8/48	0.0894453	0.628716	0.109609	-0.0508669	ARHGEF3;CNKSR1;CDC42EP1;PHACTR4;GPR56;RTKN;SRGAP1;EPS8L1
positive regulation of DNA replication (GO:0045740)	6/60	0.470239	0.988946	4.66167	-0.0518155	CDC7;IGF1R;IL6;PARM1;PDGFB;PDGFC
modification by symbiont of host morphology or physiology (GO:0044003)	2/32	0.785697	0.99661	15.4539	-0.0524811	ALB;RXRA
muscle cell development (GO:0055001)	7/75	0.525831	0.988946	4.73904	-0.0526755	SGCZ;KIAA1161;SLC8A1;ATG7;VEGFA;CACNA2D2;NFATC3
tetrapyrrole metabolic process (GO:0033013)	6/59	0.455298	0.98884	4.69411	-0.0526823	ALAD;CUBN;HMOX1;SLC25A38;BDH2;TCN2
positive regulation of protein tyrosine kinase activity (GO:0061098)	2/32	0.785697	0.99661	15.6484	-0.0531413	PDGFB;ERBB3
positive regulation of Rab GTPase activity (GO:0032851)	8/88	0.547984	0.988946	4.84382	-0.0538401	ALS2;TBC1D14;RIN2;DENND1A;DENND2A;DENND3;DENND5B;TBC1D19
regulation of synaptic transmission, GABAergic (GO:0032228)	2/32	0.785697	0.99661	15.8688	-0.0538899	PLCL2;CA2
divalent metal ion transport (GO:0070838)	26/234	0.184143	0.78572	0.224106	-0.0540443	CACHD1;CCR1;CAMK2G;TPCN1;ANXA6;VDR;CUL5;ANK2;MCOLN3;BHLHA15;TRPV4;TRPV6;FGF2;CNNM2;MICU1;TRPM3;CACNA2D1;SLC8A1;TRPM7;SLC3A2;ITPR3;CACNA2D2;ITPR2;P2RX1;PLCG2;F2R
regulation of transporter activity (GO:0032409)	13/153	0.627086	0.988946	4.86679	-0.0540955	TESC;CRHBP;SLC9A3R1;GPD1L;ANK2;RASGRF2;NEDD4;ANK3;PLCG2;DLG4;CASQ2;GLRX;CALM1
regulation of nucleocytoplasmic transport (GO:0046822)	15/178	0.642414	0.988946	4.86905	-0.0541206	IL6;TGFBR1;PPM1A;SFN;SNAI2;PKIA;GLI3;PBLD;SEMA5A;DAB2;UACA;APOD;NEDD4;TXN;OGG1
proton transport (GO:0015992)	11/131	0.638269	0.988946	4.88491	-0.0542969	ATP6V1C2;SLC36A1;SLC36A2;SLC17A5;ATP6V0A1;CYB5A;ATP6V1G3;ATP6V1B2;SLC47A1;ATP6V1D;ATP6V0D2
regulation of circadian rhythm (GO:0042752)	7/76	0.538984	0.988946	4.88503	-0.0542983	PPARA;IL6;NR1D1;ALB;EZH2;SUV39H1;RORC
negative regulation of inflammatory response (GO:0050728)	8/89	0.560037	0.988946	4.89986	-0.054463	PSMB4;UACA;PTGIS;APOD;SERPINF1;APOE;ACP5;NT5E
membrane lipid biosynthetic process (GO:0046467)	8/88	0.547984	0.988946	4.91729	-0.0546568	CWH43;ST8SIA6;P2RX1;PPAP2C;COL4A3BP;SPTSSB;PPAP2B;DEGS2
negative regulation of striated muscle tissue development (GO:0045843)	2/32	0.785697	0.99661	16.181	-0.0549501	FGF8;FGF3
protein K63-linked ubiquitination (GO:0070534)	2/32	0.785697	0.99661	16.2443	-0.0551651	NEDD4;PARK2
cellular calcium ion homeostasis (GO:0006874)	22/261	0.657077	0.988946	4.98618	-0.0554226	MICU1;SLC8A1;CCR1;C5;PTH1R;SLC37A4;EPHX2;ITPR3;CCL28;CALB1;GRM1;VDR;PLCE1;CUL5;ANK2;APOE;PLCG2;DLG4;TRPV4;RGN;FGF2;F2R
negative regulation of transporter activity (GO:0032410)	3/43	0.746493	0.994853	10.7531	-0.0554851	SLC9A3R1;CASQ2;CALM1
negative regulation of cytokine secretion (GO:0050710)	2/32	0.785697	0.99661	16.3839	-0.0556393	TNFRSF21;IL6
positive regulation of blood pressure (GO:0045777)	2/31	0.771473	0.996598	16.3386	-0.0556732	WNK1;ADH5
regulation of cell size (GO:0008361)	2/32	0.785697	0.99661	16.4003	-0.055695	RARG;IQGAP3
regulation of intrinsic apoptotic signaling pathway in response to DNA damage (GO:1902229)	2/32	0.785697	0.99661	16.4043	-0.0557086	SKIL;SNAI2
positive regulation of cellular component biogenesis (GO:0044089)	21/249	0.654056	0.988946	5.01987	-0.055797	NOX4;MTSS1;HNF1A;TGFBR1;ASIC2;IQGAP2;KIT;EPHB3;SOX9;KDR;EPHB2;CDC42EP1;PPM1E;APOE;MAPT;VEGFA;PYCARD;AGRN;BCAS3;EPS8L1;HDAC6
response to UV (GO:0009411)	10/117	0.615302	0.988946	5.04871	-0.0561175	UACA;NEDD4;MME;MAPK8;SCARA3;ATR;CAT;MYC;PIK3R1;TP53INP1
coagulation (GO:0050817)	49/472	0.194697	0.78572	0.233662	-0.0563488	F2RL3;PDGFB;F13A1;HPS4;SLC7A8;SLC7A9;PDE3B;SLC7A7;SLC16A1;SERPINE2;PROZ;SERPINE1;MGLL;ANGPT2;ANO6;KIF5A;SLC3A2;PDE10A;HNF4A;VEGFA;JMJD1C;PROS1;KIF4A;KCNMB1;DGKB;ALB;KLKB1;HBB;PIK3R1;EHD3;MAFF;SLC8A1;OLR1;ITGA1;PDE3A;SPARC;DOCK8;SOD1;ITPR3;KIF3C;PLG;ITPR2;P2RX1;ITGA6;CD58;PLCG2;CYP4F2;CALM1;F2R
regulation of DNA replication (GO:0006275)	10/118	0.625319	0.988946	5.07115	-0.056367	CDC7;ESCO1;IGF1R;IL6;PARM1;CCDC88A;PDGFB;PDGFC;ATR;SMC1A
regulation of receptor-mediated endocytosis (GO:0048259)	6/64	0.528679	0.988946	5.10017	-0.0566896	DAB2;MAGI2;VEGFA;APOC3;SERPINE1;DLG4
mitotic spindle organization (GO:0007052)	2/31	0.771473	0.996598	16.6858	-0.056856	OFD1;SMC1A
heterophilic cell-cell adhesion via plasma membrane cell adhesion molecules (GO:0007157)	2/32	0.785697	0.99661	16.7985	-0.0570473	PTPRD;CDH2
positive regulation of endothelial cell proliferation (GO:0001938)	6/63	0.5143	0.988946	5.14023	-0.0571348	SEMA5A;PDGFB;LRG1;VEGFA;FGF2;KDR
I-kappaB kinase/NF-kappaB signaling (GO:0007249)	3/42	0.732834	0.994853	11.1895	-0.0577372	IRAK2;TIFA;CD14
nuclear-transcribed mRNA catabolic process, exonucleolytic (GO:0000291)	2/31	0.771473	0.996598	16.9739	-0.0578379	LSM6;LSM3
multicellular organismal signaling (GO:0035637)	3/42	0.732834	0.994853	11.2286	-0.0579388	ANK2;SOD1;KCNQ2
regulation of apoptotic signaling pathway (GO:2001233)	30/356	0.673715	0.988946	5.21363	-0.0579507	SH3RF1;TNFRSF12A;SFN;DAB2;HMOX1;SERPINE1;PYCARD;VNN1;SKIL;HELLS;ACAA2;ARHGEF2;AR;TGFBR1;BIRC6;STRADB;PARK2;SLC9A3R1;SNAI2;SOD1;PLEKHF1;ITGA6;TRPS1;VEGFA;G0S2;MAPK8;BMPR1B;CTSH;TP53INP1;ACVR1
protein autoubiquitination (GO:0051865)	3/41	0.7186	0.994853	11.3	-0.0583072	UHRF1;PARK2;RNF146
negative regulation of intracellular signal transduction (GO:1902532)	29/345	0.67661	0.988946	5.25279	-0.0583859	PPM1A;PDE3B;GPD1L;RASAL1;IGF1R;SERPINE2;APOE;MAPKAP1;PYCARD;VNN1;SPRED1;MYC;HELLS;ARHGEF2;MAGI2;IL1RL1;FBP1;PARK2;SNAI2;SLC9A3R1;SLIT2;EPHA2;ANKRD26;DUSP2;UACA;HIPK3;CMYA5;PRNP;DUSP9
positive regulation of leukocyte migration (GO:0002687)	7/78	0.564827	0.988946	5.28374	-0.05873	IL6;AIF1;CCR1;VEGFA;SERPINE1;PYCARD;S100A14
regulation of mitotic sister chromatid separation (GO:0010965)	3/42	0.732834	0.994853	11.4186	-0.0589193	PLK1;NSMCE2;UBE2C
regulation of binding (GO:0051098)	18/218	0.680182	0.988946	5.312	-0.0590441	PPARA;MFNG;PCBD1;TGFBR1;PARK2;ATR;CAPRIN2;PLCL2;DAB2;ANKRD33;HEY1;PLK1;HMOX1;TXN;SLPI;TGFBR3;MAPK8;ADAM15
regulation of neuron death (GO:1901214)	25/225	0.189729	0.78572	0.245092	-0.0591053	PPARA;FGF8;IL6;ERBB3;LGMN;CPEB4;PM20D1;ITGA1;GRIK5;PARK2;SIX4;NR3C1;SOD1;MDK;NDNF;ATP7A;MAP3K5;CLCF1;APOE;HMOX1;VEGFA;AGRN;CHL1;GHR;F2R
hematopoietic progenitor cell differentiation (GO:0002244)	9/106	0.621707	0.988946	5.35228	-0.0594919	WDR7;SLC37A4;PYGO1;FSTL3;ZFAT;KIT;FAM115C;DHTKD1;IL11
regulation of mitochondrial outer membrane permeabilization involved in apoptotic signaling pathway (GO:1901028)	3/41	0.7186	0.994853	11.536	-0.0595248	ACAA2;MAPK8;SFN
base-excision repair (GO:0006284)	3/42	0.732834	0.994853	11.5674	-0.0596871	POLD3;OGG1;HMGA1
negative regulation of T cell proliferation (GO:0042130)	3/42	0.732834	0.994853	11.6228	-0.0599727	TNFRSF21;FOXJ1;PRNP
activation of MAPK activity (GO:0000187)	16/133	0.17241	0.78572	0.249383	-0.06014	IRAK2;IRAK1;C5;IQGAP3;ITGA1;KIT;MAPK10;SOD1;GRM1;PLCE1;MAP3K5;WNT7B;DAB2;C1QTNF2;FGF2;GHR
sperm motility (GO:0030317)	3/43	0.746493	0.994853	11.6553	-0.0601405	SORD;INPP5B;PLTP
response to glucagon (GO:0033762)	5/49	0.46788	0.988946	5.41152	-0.0601503	ADCY9;ASS1;ADCY8;QDPR;CDO1
regulation of monooxygenase activity (GO:0032768)	5/49	0.46788	0.988946	5.4357	-0.060419	VDR;APOE;NPR3;GCH1;CALM1
regulation of glucose import (GO:0046324)	5/51	0.500476	0.988946	5.44048	-0.0604722	GRB10;ENPP1;C1QTNF2;MGEA5;PIK3R1
response to calcium ion (GO:0051592)	13/100	0.142721	0.735857	0.197422	-0.0605531	IL6;SLC25A13;NEDD4;PTGES;CRHBP;SPARC;ITPR3;NFATC3;DPEP1;CASQ2;KCNMB1;CALM1;MTTP
antigen processing and presentation of peptide antigen (GO:0048002)	15/185	0.696085	0.988946	5.45628	-0.0606478	SEC23A;KIF4A;AP1M1;KIF5A;LGMN;UNC93B1;KIF3C;HLA-DQA1;PSMB4;AZGP1;BLMH;OSBPL1A;CTSE;DYNC2H1;SAR1B
developmental cell growth (GO:0048588)	8/49	0.0968961	0.644875	0.139518	-0.0612061	RARG;MAPT;USP9X;PPP3CB;SOX9;SLIT2;DCLK1;SLIT3
protein dephosphorylation (GO:0006470)	13/161	0.693611	0.988946	5.50961	-0.0612406	PPP2R3B;PTPRD;CDC14A;SMEK2;PPM1A;PDXP;PTPRO;DUSP2;RPAP2;PPM1E;PTPLA;PPP3CB;DUSP9
sensory perception of pain (GO:0019233)	5/50	0.484268	0.988946	5.53105	-0.0614788	HOXB8;NIPSNAP1;MME;GRM1;DLG2
regulation of establishment of protein localization (GO:0070201)	37/442	0.70101	0.988946	5.55439	-0.0617383	TNFRSF21;ACHE;C5;PPM1A;TNFSF15;SFN;GLI3;PBLD;SEMA5A;DAB2;APOD;ANK3;PYCARD;CLEC6A;LYPLAL1;BCAS3;PIK3R1;RHBDF2;IL6;AR;IL1RL1;TGFBR1;RHBDF1;SNAI2;PKIA;EPHA2;UACA;CD58;TXN;SYTL4;ANXA13;MAPK8;OGG1;PDZK1;CD14;F2R;HDAC6
regulation of smooth muscle contraction (GO:0006940)	5/51	0.500476	0.988946	5.56685	-0.0618768	PLCE1;P2RX1;CNN1;SOD1;F2R
lymphocyte proliferation (GO:0046651)	7/81	0.602291	0.988946	5.57586	-0.061977	PLCL2;CCND3;PPP3CB;DOCK8;CD79A;HSPD1;HELLS
calcium-mediated signaling (GO:0019722)	11/79	0.124656	0.70107	0.174605	-0.0620105	PLCE1;SLC8A1;ANK2;NCALD;BHLHA15;PLCG2;RCAN3;HOMER2;CASQ2;CALM1;KDR
positive regulation of nucleocytoplasmic transport (GO:0046824)	8/94	0.618057	0.988946	5.58594	-0.062089	SEMA5A;DAB2;IL6;UACA;NEDD4;TGFBR1;SFN;GLI3
regulation of acute inflammatory response (GO:0002673)	6/66	0.556891	0.988946	5.65892	-0.0629002	CR1;IL6;C4A;KLKB1;C5;PROS1
neuron projection development (GO:0031175)	11/137	0.691868	0.988946	5.67167	-0.063042	MICALL2;NREP;IL6;STX3;APOD;TSPAN2;NEDD4;APOE;HERC1;CHL1;KLHL1
regulation of cell killing (GO:0031341)	5/50	0.484268	0.988946	5.68037	-0.0631386	LAMP1;AZGP1;MGEA5;PPP3CB;CD226
negative regulation of chemotaxis (GO:0050922)	6/27	0.0514587	0.504044	0.0924653	-0.0633473	SEMA5A;AIF1;C5;ANGPT2;PTPRO;SLIT2
regulation of lymphocyte mediated immunity (GO:0002706)	8/95	0.629164	0.988946	5.73574	-0.063754	LAMP1;AZGP1;CR1;CLCF1;FOXJ1;PPP3CB;HSPD1;CD226
sensory perception of sound (GO:0007605)	10/124	0.682429	0.988946	5.76807	-0.0641134	SLC26A4;HOXA1;ALDH7A1;CLIC5;ASIC2;USH1C;PCDH15;SOD1;SNAI2;TMPRSS3
positive regulation of cellular protein catabolic process (GO:1903364)	6/67	0.570699	0.988946	5.7792	-0.0642371	RNF180;DAB2;PLK1;APOE;NSMCE2;PARK2
regulation of epithelial cell differentiation (GO:0030856)	9/109	0.652563	0.988946	5.84105	-0.0649247	VDR;MAFF;PRLR;FOXJ1;EZH2;ZEB2;SFN;SOX9;FRZB
osteoblast differentiation (GO:0001649)	8/98	0.661394	0.988946	5.86155	-0.0651525	ALPL;CYP24A1;DNAJC13;HSPE1;CAT;SNAI2;EPHA2;IGFBP5
regulation of phosphatase activity (GO:0010921)	13/102	0.156723	0.768416	0.249926	-0.0658365	PPP1R36;HPN;MAGI2;NUAK1;PCDH11X;CMYA5;ITGA1;WNK1;PDGFRB;LMTK3;SPRED1;DLG2;CALM1
neurotransmitter transport (GO:0006836)	8/99	0.67176	0.988946	5.92931	-0.0659056	SLC6A9;STX3;GLS;SYNJ1;SLC6A13;ABAT;PARK2;SLC6A19
MyD88-dependent toll-like receptor signaling pathway (GO:0002755)	7/82	0.614399	0.988946	5.94429	-0.0660721	IRAK2;IRAK1;RPS6KA3;MAPK8;MAPK10;HSPD1;CD14
regulation of intrinsic apoptotic signaling pathway (GO:2001242)	10/126	0.700253	0.988946	5.96427	-0.0662943	PLEKHF1;ARHGEF2;PYCARD;VNN1;PARK2;SKIL;SOD1;SNAI2;SLC9A3R1;HELLS
nucleosome assembly (GO:0006334)	8/97	0.650837	0.988946	5.97102	-0.0663693	TSPYL1;TSPY3;HIST1H2BB;TSPY1;TSPY4;HIST1H2BH;SLC30A8;SOX9
positive regulation of cell morphogenesis involved in differentiation (GO:0010770)	15/123	0.170165	0.783649	0.272942	-0.0665417	PTPRD;TNFRSF12A;EZH2;SLIT2;CAPRIN2;SEMA5A;DAB2;ZNF703;APOE;MAPT;VEGFA;SKIL;CUX1;ISLR2;NET1
small GTPase mediated signal transduction (GO:0007264)	41/439	0.445247	0.973703	2.49901	-0.0665961	RAB3C;AIF1;IQGAP3;IQGAP2;RTKN;RRAD;RGL1;CDC42EP1;RASGRP3;HMOX1;RHOBTB1;ARHGAP11A;DOCK10;FGF2;INPP5B;NET1;ARHGEF3;CNKSR1;PLD1;ARHGEF2;PHACTR4;ARHGAP28;DOCK8;ARHGEF9;DOCK5;ARHGEF12;FARP2;ARHGAP31;ARL17B;PLCE1;RAB31;ARHGAP32;SH2D3A;RASGRF2;GPR56;RIN2;RASD1;SRGAP1;EPS8L1;SRGAP2;ARHGAP10
forebrain development (GO:0030900)	5/53	0.532273	0.988946	6.02705	-0.066992	GSC;SSTR1;DYNC2H1;LRP2;DCLK1
regulation of adaptive immune response (GO:0002819)	9/112	0.681935	0.988946	6.09559	-0.0677539	AZGP1;CR1;CLCF1;FOXJ1;IL1RL1;PPP3CB;PYCARD;HSPD1;CD226
negative regulation of transferase activity (GO:0051348)	27/284	0.430983	0.973703	2.54598	-0.0678477	FOXA2;SFN;PSMB4;IGF1R;APOE;PPP1R1B;PYCARD;SPRED1;TESC;IL6;SOCS3;WNK1;CRIPAK;PARK2;UBE2C;PKIA;CAMK2N1;THY1;DUSP2;PPM1E;PLK1;HIPK3;GADD45B;CHORDC1;DUSP9;GADD45A;LRP5
hexose transport (GO:0008645)	6/69	0.597661	0.988946	6.11611	-0.067982	SLC2A12;SLC5A2;G6PC;HNF1A;SLC2A2;SLC37A4
glucose transport (GO:0015758)	6/68	0.584292	0.988946	6.11684	-0.0679901	SLC2A12;SLC5A2;G6PC;HNF1A;SLC2A2;SLC37A4
embryonic digit morphogenesis (GO:0042733)	5/55	0.563124	0.988946	6.21363	-0.0690659	WDPCP;GRHL2;GLI3;LRP5;HOXD11
protein localization to nucleus (GO:0034504)	8/101	0.691903	0.988946	6.21759	-0.0691099	OSBPL8;IPO13;TRPS1;PIKFYVE;PYGO1;ING1;PIK3R1;F2R
retrograde transport, endosome to Golgi (GO:0042147)	5/54	0.547824	0.988946	6.23474	-0.0693006	TBC1D14;PIKFYVE;SURF4;SNX1;DENND2A
hormone secretion (GO:0046879)	6/70	0.610797	0.988946	6.25868	-0.0695667	IL6;HNF1A;CAMK2G;TRPV4;SLC30A8;PCLO
response to hypoxia (GO:0001666)	23/241	0.434167	0.973703	2.62514	-0.0699572	NOX4;ACAA2;PPARA;IRAK1;EPAS1;PDGFB;BIRC2;AGTRAP;ITPR2;MTHFR;PTGIS;PLOD1;HMOX1;P2RX3;VEGFA;PKLR;ABAT;TGFBR3;NDRG1;FABP1;CAT;ANGPT2;DPP4
embryonic limb morphogenesis (GO:0030326)	7/86	0.660755	0.988946	6.33201	-0.0703817	FGF8;RARG;DYNC2H1;PBX1;LRP5;ALX1;HOXD11
nucleoside phosphate biosynthetic process (GO:1901293)	20/209	0.438561	0.973703	2.64169	-0.0703985	ASPDH;ADSSL1;KYNU;ADCY8;UGDH;UPP2;AK2;KMO;AK4;AFMID;SLC25A13;ADCY9;SLC35D1;PANK1;RRM2;GFPT2;PKLR;HAAO;QPRT;UGP2
embryonic appendage morphogenesis (GO:0035113)	7/86	0.660755	0.988946	6.33751	-0.0704428	FGF8;RARG;DYNC2H1;PBX1;LRP5;ALX1;HOXD11
regulation of microtubule cytoskeleton organization (GO:0070507)	8/100	0.68193	0.988946	6.35181	-0.0706018	ARHGEF2;SPAG5;MAPT;STMN4;TRPV4;CHORDC1;EML4;HDAC6
positive regulation of synaptic transmission (GO:0050806)	7/85	0.649489	0.988946	6.35277	-0.0706125	STX3;SERPINE2;SYNJ1;DLG4;CA2;ITPR3;STX1B
regulation of intracellular transport (GO:0032386)	37/394	0.437851	0.973703	2.65496	-0.0707519	F2RL3;PPM1A;SFN;GLI3;PBLD;SEMA5A;DAB2;APOD;ANK2;ANK3;MAPT;HMOX1;LYPLAL1;BCAS3;REEP6;ACAA2;SLC8A1;IL6;CRYAA;TGFBR1;SNAI2;PKIA;THY1;LAMP1;UACA;NEDD4;P2RX3;TXN;MGEA5;ANXA13;MAPK8;OGG1;PDZK1;SCP2;CASQ2;F2R;CALM1
toll-like receptor TLR6:TLR2 signaling pathway (GO:0038124)	6/71	0.623691	0.988946	6.39264	-0.0710557	IRAK2;IRAK1;RPS6KA3;MAPK8;MAPK10;CD14
purine nucleoside monophosphate metabolic process (GO:0009126)	38/403	0.426876	0.971056	2.43152	-0.0714164	ABCA8;KIF4A;ENPP1;ABCA1;ATP6V1B2;ABCA4;DNAH5;ABCA5;DDX11;DDX3Y;ENTPD5;DYNC2H1;PMS2;DDX10;KIF21A;NT5E;DDX43;ABCA13;ADSSL1;MSH3;CCNH;KIF5A;MSH5;KIF5C;AK2;YTHDC2;AK4;HLTF;KIF3C;ABCG1;ATP7A;SLC25A13;DHX29;PKLR;ABCC2;HSPD1;DDX53;ABCC6
stress-activated protein kinase signaling cascade (GO:0031098)	12/91	0.144928	0.745489	0.246432	-0.0723808	IRAK2;IRAK1;RPS6KA3;MAP3K5;SH2D3A;FGF14;ROR2;MAPK8;MAPK10;STRADB;DUSP9;MAP3K13
positive regulation of stem cell differentiation (GO:2000738)	4/39	0.482974	0.988946	6.68704	-0.0743279	DAB2;ZNF703;EZH2;SOX9
regulation of tissue remodeling (GO:0034103)	5/58	0.607372	0.988946	6.72479	-0.0747476	VDR;TFRC;VEGFA;CA2;LRP5
toll-like receptor 9 signaling pathway (GO:0034162)	6/73	0.648728	0.988946	6.74589	-0.0749822	IRAK2;IRAK1;RPS6KA3;UNC93B1;MAPK8;MAPK10
intracellular receptor signaling pathway (GO:0030522)	18/186	0.427675	0.972049	2.65508	-0.0752696	IRAK2;PPARA;CYP24A1;IRAK1;AR;RARG;RXRA;RORC;NR3C1;HNF4G;VDR;NR1D1;HNF4A;NEDD4;TXN;PYCARD;PIAS2;NR1H4
positive regulation of neuron projection development (GO:0010976)	14/144	0.438839	0.973703	2.84037	-0.0756929	PTPRD;MAGI2;TNFRSF12A;NDNF;SLIT2;CAPRIN2;SEMA5A;APOE;MAPT;VEGFA;SKIL;CUX1;FEZ1;ISLR2
synaptic vesicle transport (GO:0048489)	5/57	0.592909	0.988946	6.83114	-0.0759297	DDC;STX7;SYNJ1;DENND1A;PCLO
regulation of immunoglobulin mediated immune response (GO:0002889)	4/40	0.501296	0.988946	6.83504	-0.075973	CR1;CLCF1;FOXJ1;CD226
histone methylation (GO:0016571)	6/74	0.660859	0.988946	6.87086	-0.0763712	SUV420H2;KDM6A;WDR61;EZH2;SUV39H1;SETD3
regulation of B cell mediated immunity (GO:0002712)	4/41	0.519327	0.988946	6.91601	-0.076873	CR1;CLCF1;FOXJ1;CD226
regulation of calcium-mediated signaling (GO:0050848)	4/38	0.46439	0.988946	6.92491	-0.076972	P2RX3;CMYA5;RGN;PRNP
regulation of JUN kinase activity (GO:0043506)	6/75	0.672724	0.988946	6.95142	-0.0772666	DAB2;WNT7B;MAP3K5;HIPK3;ZEB2;FZD5
toll-like receptor signaling pathway (GO:0002224)	12/122	0.434826	0.973703	2.90739	-0.0774791	IRAK2;IRAK1;RPS6KA3;LGMN;UNC93B1;MAPK8;MAPK10;HSPD1;CTSB;BIRC2;S100A14;CD14
negative regulation of actin filament polymerization (GO:0030837)	4/40	0.501296	0.988946	7.01569	-0.077981	FHOD3;SPTBN1;TMSB4Y;SLIT2
cell fate commitment (GO:0045165)	13/134	0.446909	0.973703	2.93065	-0.0780989	IL6;WNT7B;EPAS1;TGFBR1;DLL4;TEAD4;SOX12;LHX6;TFAP2C;SOX9;WT1;ACVR1;KDR
negative regulation of blood pressure (GO:0045776)	4/39	0.482974	0.988946	7.02926	-0.0781318	SCPEP1;PPARA;ABAT;GCH1
bone mineralization (GO:0030282)	4/39	0.482974	0.988946	7.05219	-0.0783867	MINPP1;MTSS1;PTH1R;ANO6
regulation of stem cell differentiation (GO:2000736)	9/91	0.450193	0.97872	3.65587	-0.0786382	N4BP2L2;DAB2;HPN;ZNF703;FOXA2;EZH2;TGFBR3;SOX9;PBLD
pigment metabolic process (GO:0042440)	5/60	0.635387	0.988946	7.08734	-0.0787774	SHMT1;ALAD;HMOX1;SLC25A38;BDH2
negative regulation of protein complex assembly (GO:0031333)	9/91	0.450193	0.97872	3.68209	-0.0792023	DNAJC15;EIF4EBP1;FHOD3;PPM1A;SPTBN1;PEX5;TMSB4Y;BIRC2;SLIT2
regulation of bone remodeling (GO:0046850)	4/40	0.501296	0.988946	7.12679	-0.0792159	TFRC;VEGFA;CA2;LRP5
regulation of JAK-STAT cascade (GO:0046425)	6/76	0.684321	0.988946	7.12787	-0.0792279	IL6;CLCF1;STRA6;KIT;GHR;F2R
hair follicle development (GO:0001942)	4/38	0.46439	0.988946	7.15469	-0.079526	FZD3;TFAP2C;APCDD1;SOX9
somitogenesis (GO:0001756)	4/41	0.519327	0.988946	7.17388	-0.0797393	MIB1;ROR2;FOXC1;ZEB2
porphyrin-containing compound metabolic process (GO:0006778)	4/38	0.46439	0.988946	7.1786	-0.0797918	ALAD;HMOX1;SLC25A38;BDH2
chondrocyte differentiation (GO:0002062)	4/41	0.519327	0.988946	7.19345	-0.0799568	TRPS1;PTH1R;SOX9;BMPR1B
negative regulation of small GTPase mediated signal transduction (GO:0051058)	4/39	0.482974	0.988946	7.19555	-0.0799802	RASAL1;MAPKAP1;FBP1;SLIT2
phosphatidylcholine metabolic process (GO:0046470)	5/62	0.662138	0.988946	7.27666	-0.0808817	AGPAT6;ACHE;PCYT1B;LPIN2;CHPT1
cytokine secretion (GO:0050663)	2/30	0.756432	0.994853	15.7011	-0.0810165	CHI3L1;ABCA1
blood circulation (GO:0008015)	4/40	0.501296	0.988946	7.31357	-0.081292	MTHFR;MEOX2;OLR1;DLL4
ERBB signaling pathway (GO:0038127)	22/196	0.195988	0.78572	0.337198	-0.081317	FGF6;FGF18;FGF8;PDGFB;ADCY8;KL;ERBB3;KIT;ITPR3;SOX9;ITPR2;PLCE1;ADCY9;MAPKAP1;PDGFRB;FGF1;THEM4;FGF2;TNRC6A;PIK3R1;FGF3;CALM1
embryonic hindlimb morphogenesis (GO:0035116)	2/30	0.756432	0.994853	15.7622	-0.0813317	FGF8;RARG
positive regulation of tumor necrosis factor production (GO:0032760)	4/44	0.571454	0.988946	7.38913	-0.0821318	ARHGEF2;PYCARD;PIK3R1;CD14
positive regulation of cell killing (GO:0031343)	4/42	0.537045	0.988946	7.40941	-0.0823573	LAMP1;AZGP1;MGEA5;CD226
response to activity (GO:0014823)	4/43	0.554427	0.988946	7.45563	-0.082871	ADSSL1;HADH;ANGPT2;PCK1
negative regulation of ossification (GO:0030279)	5/65	0.699806	0.988946	7.46348	-0.0829582	ENPP1;CCR1;SOX9;LRP5;IGFBP5
ribonucleoside monophosphate biosynthetic process (GO:0009156)	6/78	0.706697	0.988946	7.50346	-0.0834026	ADSSL1;SLC25A13;PKLR;AK2;UPP2;AK4
cellular response to retinoic acid (GO:0071300)	5/62	0.662138	0.988946	7.50903	-0.0834646	TESC;WNT7B;RARG;ABCA1;SOX9
actin filament-based movement (GO:0030048)	5/61	0.648924	0.988946	7.53816	-0.0837883	DES;MYBPC2;UTY;MYL3;WIPF1
cardiac muscle cell action potential (GO:0086001)	2/30	0.756432	0.994853	16.271	-0.0839572	GPD1L;ANK2
response to mineralocorticoid (GO:0051385)	2/28	0.723775	0.994853	16.4323	-0.0847892	MAOB;CALM1
cardiac muscle cell action potential involved in contraction (GO:0086002)	2/29	0.740543	0.994853	16.4734	-0.0850016	GPD1L;ANK2
JAK-STAT cascade (GO:0007259)	4/44	0.571454	0.988946	7.64848	-0.0850146	PRLR;CLCF1;SOCS3;GHR
regulation of lamellipodium organization (GO:1902743)	2/28	0.723775	0.994853	16.4915	-0.0850948	SLIT2;EPHA2
vasoconstriction (GO:0042310)	2/30	0.756432	0.994853	16.5547	-0.085421	SLC8A1;P2RX1
regulation of membrane permeability (GO:0090559)	2/30	0.756432	0.994853	16.6047	-0.085679	ACAA2;THEM4
cellular response to ketone (GO:1901655)	2/29	0.740543	0.994853	16.6251	-0.0857842	ASS1;UGT3A2
regulation of signal transduction by p53 class mediator (GO:1901796)	4/44	0.571454	0.988946	7.80979	-0.0868076	ATR;SPRED1;SNAI2;PLA2R1
regulation of leukocyte mediated cytotoxicity (GO:0001910)	4/44	0.571454	0.988946	7.81946	-0.086915	LAMP1;AZGP1;PPP3CB;CD226
cardiac septum morphogenesis (GO:0060411)	4/43	0.554427	0.988946	7.82623	-0.0869903	FGF8;DHRS3;HEY1;ACVR1
regulation of cysteine-type endopeptidase activity involved in apoptotic process (GO:0043281)	21/186	0.196004	0.78572	0.361271	-0.0871224	SH3RF1;IL6;AIFM1;TNFSF15;SOX7;RPS27L;SFN;BCL2L13;RPS6KA3;MAP3K5;UACA;P2RX1;VEGFA;PYCARD;HSPE1;FABP1;HSPD1;MYC;CTSH;DPEP1;F2R
negative regulation of mitochondrion organization (GO:0010823)	2/29	0.740543	0.994853	16.9112	-0.0872606	ACAA2;PARK2
tetrapyrrole biosynthetic process (GO:0033014)	2/30	0.756432	0.994853	16.9629	-0.087527	ALAD;SLC25A38
positive regulation of proteolysis involved in cellular protein catabolic process (GO:1903052)	5/65	0.699806	0.988946	7.88472	-0.0876405	RNF180;DAB2;PLK1;NSMCE2;PARK2
regulation of metaphase/anaphase transition of cell cycle (GO:1902099)	4/45	0.58811	0.988946	7.89045	-0.0877041	PLK1;NSMCE2;UBE2C;NEK6
purine nucleoside monophosphate biosynthetic process (GO:0009127)	5/64	0.687583	0.988946	7.90957	-0.0879167	ADSSL1;SLC25A13;PKLR;AK2;AK4
limb morphogenesis (GO:0035108)	10/101	0.440889	0.973703	3.29909	-0.0879173	FGF8;RARG;DYNC2H1;PBX1;BMPR1B;PCSK5;GLI3;LRP5;ALX1;HOXD11
lung cell differentiation (GO:0060479)	2/30	0.756432	0.994853	17.1104	-0.0882881	FOXA2;SOX9
exonucleolytic nuclear-transcribed mRNA catabolic process involved in deadenylation-dependent decay (GO:0043928)	2/29	0.740543	0.994853	17.1732	-0.0886125	LSM6;LSM3
regulation of substrate adhesion-dependent cell spreading (GO:1900024)	2/30	0.756432	0.994853	17.1958	-0.0887291	DAB2;NET1
fatty-acyl-CoA metabolic process (GO:0035337)	2/29	0.740543	0.994853	17.2226	-0.0888671	ACSM2A;ELOVL2
regulation of transcription from RNA polymerase II promoter in response to hypoxia (GO:0061418)	2/29	0.740543	0.994853	17.2339	-0.0889256	EPAS1;VEGFA
skeletal muscle cell differentiation (GO:0035914)	4/47	0.620255	0.988946	8.0554	-0.0895376	MAFF;ANKRD33;ANKRD2;ZNF689
activation of signaling protein activity involved in unfolded protein response (GO:0006987)	5/64	0.687583	0.988946	8.05561	-0.08954	DDX11;TPP1;PDIA5;GOSR2;WIPI1
nucleotide-binding domain, leucine rich repeat containing receptor signaling pathway (GO:0035872)	4/46	0.604381	0.988946	8.06494	-0.0896436	IRAK2;IRAK1;TXN;PYCARD
actin-mediated cell contraction (GO:0070252)	4/46	0.604381	0.988946	8.08005	-0.0898116	DES;MYBPC2;UTY;MYL3
lung epithelial cell differentiation (GO:0060487)	2/29	0.740543	0.994853	17.5055	-0.0903272	FOXA2;SOX9
regulation of calcium ion transmembrane transport (GO:1903169)	4/48	0.635722	0.988946	8.15572	-0.0906526	ANK2;PLCG2;CASQ2;CALM1
tube formation (GO:0035148)	14/114	0.174561	0.78572	0.375927	-0.0906567	MIB1;KDM6A;RARG;PHACTR4;PODXL;VEGFA;FZD3;TEAD2;LIAS;ZEB2;SOX9;BCAS3;GRHL2;ALX1
positive regulation of intrinsic apoptotic signaling pathway (GO:2001244)	4/48	0.635722	0.988946	8.17954	-0.0909175	PLEKHF1;SKIL;SOD1;SLC9A3R1
neuron death (GO:0070997)	4/47	0.620255	0.988946	8.29086	-0.0921548	TNFRSF21;MEOX2;ERBB3;AIFM1
positive regulation of neuron apoptotic process (GO:0043525)	4/47	0.620255	0.988946	8.29586	-0.0922104	ITGA1;GRIK5;AGRN;NR3C1
epithelial tube morphogenesis (GO:0060562)	9/90	0.438116	0.973703	3.49596	-0.0931639	MIB1;MTSS1;FGF8;DLL4;TEAD2;SOX17;NR3C1;KLHL3;ACVR1
lipid phosphorylation (GO:0046834)	7/39	0.0830097	0.628716	0.203061	-0.0942356	PIKFYVE;PIP5K1B;PI4KA;CERK;PIP4K2A;PIK3R1;IP6K2
response to fatty acid (GO:0070542)	4/50	0.665406	0.988946	8.48939	-0.0943615	ASS1;FABP3;TGFBR3;HMGCL
positive regulation of fibroblast proliferation (GO:0048146)	4/49	0.650774	0.988946	8.49403	-0.094413	S100A6;PDGFB;PDGFC;MYC
negative regulation of protein polymerization (GO:0032272)	4/50	0.665406	0.988946	8.50565	-0.0945422	FHOD3;SPTBN1;TMSB4Y;SLIT2
leukocyte homeostasis (GO:0001776)	4/51	0.679612	0.988946	8.65098	-0.0961576	SLC37A4;PPP3CB;SKIL;SLC40A1
unsaturated fatty acid biosynthetic process (GO:0006636)	4/51	0.679612	0.988946	8.79175	-0.0977224	PTGIS;PTGES;ELOVL2;MGST2
antigen processing and presentation of exogenous peptide antigen via MHC class II (GO:0019886)	12/93	0.159788	0.769904	0.376843	-0.0985405	SEC23A;KIF4A;AP1M1;KIF5A;OSBPL1A;LGMN;DYNC2H1;CTSE;UNC93B1;SAR1B;KIF3C;HLA-DQA1
regulation of vasoconstriction (GO:0019229)	4/52	0.693392	0.988946	8.87223	-0.0986169	P2RX1;ASIC2;ACE2;F2R
vacuolar transport (GO:0007034)	4/50	0.665406	0.988946	8.88932	-0.0988068	ARSB;LAMP1;NEDD4;DENND3
positive regulation of proteasomal ubiquitin-dependent protein catabolic process (GO:0032436)	4/52	0.693392	0.988946	8.89853	-0.0989091	RNF180;DAB2;PLK1;NSMCE2
regulation of tyrosine phosphorylation of STAT protein (GO:0042509)	4/53	0.706744	0.988946	8.924	-0.0991923	IL6;CLCF1;KIT;GHR
leukocyte proliferation (GO:0070661)	9/89	0.426011	0.971016	3.42978	-0.100878	PLCL2;CCND3;PPP3CB;DOCK8;NPR3;CD79A;KIT;HSPD1;HELLS
neurogenesis (GO:0022008)	7/39	0.0830097	0.628716	0.217806	-0.101078	PRDM13;PRDM12;MAPT;SPOCK1;SIX4;PRDM16;DBN1
negative regulation of kidney development (GO:0090185)	1/16	0.770679	0.996598	30.2919	-0.103218	WT1
organ formation (GO:0048645)	1/17	0.789719	0.99661	31.1379	-0.105743	SOX17
positive regulation of skeletal muscle tissue development (GO:0048643)	1/16	0.770679	0.996598	31.0843	-0.105918	SOX17
positive regulation of axon extension (GO:0045773)	6/26	0.0451452	0.469382	0.140375	-0.106171	SEMA5A;TNFRSF12A;APOE;MAPT;VEGFA;ISLR2
negative regulation of intracellular transport (GO:0032387)	13/104	0.17141	0.78572	0.441072	-0.106367	ACAA2;UACA;APOD;CRYAA;MAPT;HMOX1;TXN;PPM1A;ANXA13;LYPLAL1;SNAI2;PKIA;PBLD
positive regulation of triglyceride metabolic process (GO:0090208)	1/17	0.789719	0.99661	31.5159	-0.107027	LDLR
positive regulation of Ras protein signal transduction (GO:0046579)	3/30	0.523301	0.988946	9.63841	-0.107133	ALS2;GPR56;F2R
chondroitin sulfate metabolic process (GO:0030204)	9/59	0.108082	0.662963	0.261104	-0.107323	ARSB;SLC35D1;SPOCK2;GPC6;HEXA;DSEL;DCN;AGRN;NDNF
oocyte maturation (GO:0001556)	1/17	0.789719	0.99661	31.6095	-0.107345	PDE3A
cytokine production (GO:0001816)	7/68	0.430548	0.973703	4.04006	-0.107663	MAF;SLC37A4;GPR56;KIT;HSPD1;PLA2R1;CD226
positive regulation of regulated secretory pathway (GO:1903307)	1/17	0.789719	0.99661	31.7427	-0.107797	LAMP1
pseudouridine synthesis (GO:0001522)	1/17	0.789719	0.99661	31.9519	-0.108508	RPUSD1
negative regulation of mRNA processing (GO:0050686)	1/17	0.789719	0.99661	32.0253	-0.108757	SAP18
response to amphetamine (GO:0001975)	3/29	0.502205	0.988946	9.78879	-0.108805	PPP1R1B;SOD1;CALM1
negative regulation of dendrite development (GO:2000171)	1/16	0.770679	0.996598	32.1169	-0.109437	APOE
regulation of interleukin-6 biosynthetic process (GO:0045408)	1/16	0.770679	0.996598	32.1606	-0.109586	FOXJ1
cochlea development (GO:0090102)	1/16	0.770679	0.996598	32.1913	-0.10969	HOXA1
ATP metabolic process (GO:0046034)	36/377	0.402051	0.952193	2.2392	-0.109694	ABCA8;KIF4A;ENPP1;ABCA1;ATP6V1B2;ABCA4;DNAH5;ABCA5;DDX11;DDX3Y;ENTPD5;DYNC2H1;PMS2;DDX10;KIF21A;DDX43;ABCA13;MSH3;KIF5A;CCNH;MSH5;KIF5C;AK2;YTHDC2;AK4;HLTF;KIF3C;ABCG1;ATP7A;SLC25A13;DHX29;PKLR;ABCC2;HSPD1;DDX53;ABCC6
isotype switching (GO:0045190)	1/17	0.789719	0.99661	32.3274	-0.109783	HSPD1
somatic diversification of immunoglobulins involved in immune response (GO:0002208)	1/17	0.789719	0.99661	32.3548	-0.109876	HSPD1
negative regulation of smoothened signaling pathway (GO:0045879)	3/28	0.48064	0.988946	9.88821	-0.10991	WNT7B;SERPINE2;GLI3
positive regulation of protein deacetylation (GO:0090312)	1/17	0.789719	0.99661	32.5036	-0.110381	VEGFA
long-term memory (GO:0007616)	3/28	0.48064	0.988946	9.97068	-0.110826	LRRN4;ADCY8;CALB1
positive regulation of T-helper cell differentiation (GO:0045624)	1/16	0.770679	0.996598	32.5779	-0.111008	IL6
trophectodermal cell differentiation (GO:0001829)	1/17	0.789719	0.99661	32.7763	-0.111307	TFAP2C
action potential (GO:0001508)	7/69	0.44441	0.973703	4.18092	-0.111417	GPD1L;ANK2;P2RX1;ANK3;P2RX3;SCN9A;SCN7A
establishment of mitotic spindle orientation (GO:0000132)	1/17	0.789719	0.99661	32.8389	-0.11152	ARHGEF2
glycogen biosynthetic process (GO:0005978)	3/28	0.48064	0.988946	10.0397	-0.111593	ACADM;NR1D1;UGP2
epithelial tube formation (GO:0072175)	3/27	0.458642	0.988946	10.0717	-0.111949	MIB1;PODXL;SOX9
regulation of positive chemotaxis (GO:0050926)	3/27	0.458642	0.988946	10.0806	-0.112048	VEGFA;ANGPT2;KDR
myoblast fusion (GO:0007520)	1/17	0.789719	0.99661	33.0698	-0.112304	NEO1
long-term synaptic potentiation (GO:0060291)	3/30	0.523301	0.988946	10.1213	-0.1125	STX3;SERPINE2;ITPR3
release of sequestered calcium ion into cytosol (GO:0051209)	3/30	0.523301	0.988946	10.1303	-0.1126	PLCG2;FGF2;F2R
positive regulation of DNA recombination (GO:0045911)	1/16	0.770679	0.996598	33.2223	-0.113203	CLCF1
glutathione derivative biosynthetic process (GO:1901687)	3/27	0.458642	0.988946	10.1999	-0.113374	GSTA1;GSTA2;MGST2
glutathione derivative metabolic process (GO:1901685)	3/27	0.458642	0.988946	10.2253	-0.113657	GSTA1;GSTA2;MGST2
regulation of mRNA catabolic process (GO:0061013)	1/17	0.789719	0.99661	33.4728	-0.113672	NBAS
response to electrical stimulus (GO:0051602)	3/29	0.502205	0.988946	10.231	-0.11372	ADSSL1;IL6;GRM1
positive regulation of protein catabolic process (GO:0045732)	13/130	0.40712	0.957671	2.62947	-0.113727	SNX1;PARK2;MYLIP;SOX9;RNF180;DAB2;APOE;PLK1;NEDD4;ATG7;NSMCE2;SOX17;SH3D19
cardiac muscle cell development (GO:0055013)	3/31	0.543895	0.988946	10.2628	-0.114074	SLC8A1;ATG7;VEGFA
B cell receptor signaling pathway (GO:0050853)	3/33	0.58348	0.988946	10.3013	-0.114501	BLK;PLCG2;CD79A
regulation of receptor internalization (GO:0002090)	3/29	0.502205	0.988946	10.3199	-0.114708	MAGI2;VEGFA;DLG4
regulation of activated T cell proliferation (GO:0046006)	3/32	0.563962	0.988946	10.3413	-0.114946	PYCARD;HHLA2;PRNP
myeloid leukocyte mediated immunity (GO:0002444)	1/16	0.770679	0.996598	33.8376	-0.1153	IL6
ribonucleoside bisphosphate biosynthetic process (GO:0034030)	1/17	0.789719	0.99661	34.0277	-0.115557	PANK1
glycerolipid catabolic process (GO:0046503)	3/28	0.48064	0.988946	10.4112	-0.115723	APOC3;MGLL;PNPLA3
embryonic axis specification (GO:0000578)	3/34	0.602433	0.988946	10.4417	-0.116062	KDM6A;FOXA2;FZD5
2'-deoxyribonucleotide metabolic process (GO:0009394)	3/31	0.543895	0.988946	10.499	-0.116699	MGEA5;AK2;OGG1
peroxisomal transport (GO:0043574)	1/17	0.789719	0.99661	34.3675	-0.116711	PEX5
B cell activation involved in immune response (GO:0002312)	3/30	0.523301	0.988946	10.5078	-0.116796	PLCL2;PLCG2;HSPD1
negative regulation of insulin secretion (GO:0046676)	3/31	0.543895	0.988946	10.5398	-0.117152	SYTL4;PARK2;HADH
positive regulation of gliogenesis (GO:0014015)	3/35	0.620806	0.988946	10.5765	-0.117561	ASPA;SERPINE2;CLCF1
regulation of sequestering of calcium ion (GO:0051282)	3/32	0.563962	0.988946	10.5897	-0.117707	PLCG2;FGF2;F2R
nitric oxide metabolic process (GO:0046209)	3/30	0.523301	0.988946	10.5985	-0.117805	SLC7A2;GCH1;CALM1
regulation of glycogen biosynthetic process (GO:0005979)	3/29	0.502205	0.988946	10.6091	-0.117923	GRB10;ENPP1;C1QTNF2
response to pain (GO:0048265)	3/32	0.563962	0.988946	10.6107	-0.11794	P2RX3;SCN9A;GCH1
T cell differentiation in thymus (GO:0033077)	3/34	0.602433	0.988946	10.6169	-0.118009	RORC;FZD5;GLI3
tissue regeneration (GO:0042246)	3/28	0.48064	0.988946	10.6174	-0.118015	APOD;GATM;ADAM15
female gonad development (GO:0008585)	1/16	0.770679	0.996598	34.6378	-0.118027	IDH1
quinone metabolic process (GO:1901661)	3/29	0.502205	0.988946	10.6613	-0.118502	CBR4;CYP4F2;PDSS1
regulation of respiratory system process (GO:0044065)	1/16	0.770679	0.996598	34.8813	-0.118857	GLS
regulation of vascular permeability (GO:0043114)	3/27	0.458642	0.988946	10.7146	-0.119095	VEGFA;PDE3A;SLIT2
cell part morphogenesis (GO:0032990)	27/248	0.204684	0.78572	0.494535	-0.11926	ALS2;S100A6;ULK4;EPHB3;EPHB2;OFD1;IGF1R;WDPCP;ANK3;ATG7;COL4A3BP;DLG4;GALNT11;TSKU;DCLK1;FOXJ1;NTNG1;ZSWIM6;FRZB;FZD5;ATP7A;EPB41L3;WNT7B;MAP1S;CC2D2A;SRGAP2;CDH11
regulation of gastrulation (GO:0010470)	3/31	0.543895	0.988946	10.7425	-0.119406	HNF4A;FOXA2;SOX17
negative regulation of muscle organ development (GO:0048635)	3/34	0.602433	0.988946	10.7437	-0.119418	FGF8;IL6;FGF3
regulation of cellular pH (GO:0030641)	3/32	0.563962	0.988946	10.7716	-0.119728	SLC26A6;CA2;GPR89A
dentate gyrus development (GO:0021542)	1/16	0.770679	0.996598	35.1426	-0.119747	MDK
epithelial cell maturation (GO:0002070)	1/16	0.770679	0.996598	35.2138	-0.11999	AGPAT6
mesoderm formation (GO:0001707)	3/35	0.620806	0.988946	10.802	-0.120067	FOXC1;EPHA2;ACVR1
histone H4 deacetylation (GO:0070933)	1/17	0.789719	0.99661	35.3796	-0.120148	HDAC6
sensory perception of taste (GO:0050909)	3/32	0.563962	0.988946	10.8117	-0.120175	P2RX3;ASIC2;ITPR3
positive regulation of small GTPase mediated signal transduction (GO:0051057)	3/35	0.620806	0.988946	10.8122	-0.12018	ALS2;GPR56;F2R
sodium ion transmembrane transport (GO:0035725)	11/82	0.146803	0.74675	0.412065	-0.120333	SLC23A1;SLC8A1;SLC17A3;SLC12A3;ASIC2;SLC3A2;SLC13A1;SCN9A;SCN7A;SLC4A4;TRAPPC10
positive regulation of glucose transport (GO:0010828)	3/35	0.620806	0.988946	10.8484	-0.120583	C1QTNF2;MGEA5;PIK3R1
endoplasmic reticulum organization (GO:0007029)	3/28	0.48064	0.988946	10.8642	-0.120758	ATL2;COL4A3BP;PEX5
response to interleukin-4 (GO:0070670)	3/32	0.563962	0.988946	10.8842	-0.120981	ALAD;SHPK;NFIL3
protein-DNA complex disassembly (GO:0032986)	1/17	0.789719	0.99661	35.8366	-0.1217	HMGA1
negative regulation of microtubule polymerization or depolymerization (GO:0031111)	3/32	0.563962	0.988946	10.9578	-0.121798	ARHGEF2;EML4;HDAC6
regulation of muscle adaptation (GO:0043502)	3/36	0.638592	0.988946	11.0027	-0.122298	CAMK2G;CMYA5;MGEA5
glycoprotein biosynthetic process (GO:0009101)	3/35	0.620806	0.988946	11.0183	-0.122471	ATP7A;GAL3ST3;GLCE
skin development (GO:0043588)	3/35	0.620806	0.988946	11.056	-0.12289	ATP7A;ITGA6;ITGB4
regulation of muscle cell apoptotic process (GO:0010660)	3/38	0.672379	0.988946	11.0692	-0.123037	IGF1R;HMOX1;APOH
negative regulation of lymphocyte differentiation (GO:0045620)	3/36	0.638592	0.988946	11.0742	-0.123092	FOXJ1;DTX1;GLI3
histone lysine methylation (GO:0034968)	6/58	0.44026	0.973703	4.62494	-0.12325	SUV420H2;KDM6A;WDR61;EZH2;SUV39H1;SETD3
regulation of bone resorption (GO:0045124)	3/33	0.58348	0.988946	11.1099	-0.12349	TFRC;VEGFA;CA2
negative regulation of stress-activated MAPK cascade (GO:0032873)	3/36	0.638592	0.988946	11.1698	-0.124155	HIPK3;PARK2;MYC
protein localization to peroxisome (GO:0072662)	1/16	0.770679	0.996598	36.478	-0.124297	PEX5
positive regulation of cell-matrix adhesion (GO:0001954)	3/39	0.688378	0.988946	11.2071	-0.124569	VEGFA;CCL28;KDR
negative regulation of cell cycle arrest (GO:0071157)	1/16	0.770679	0.996598	36.5891	-0.124676	MLXIPL
protein targeting to peroxisome (GO:0006625)	1/16	0.770679	0.996598	36.7193	-0.125119	PEX5
somatic diversification of immune receptors (GO:0002200)	3/37	0.655784	0.988946	11.2698	-0.125267	MSH3;PMS2;HSPD1
cell differentiation in spinal cord (GO:0021515)	3/38	0.672379	0.988946	11.2927	-0.125521	MDGA1;LHX3;DYNC2H1
neuron apoptotic process (GO:0051402)	3/38	0.672379	0.988946	11.296	-0.125557	TNFRSF21;ERBB3;AIFM1
establishment of protein localization to peroxisome (GO:0072663)	1/16	0.770679	0.996598	36.9245	-0.125819	PEX5
actin-myosin filament sliding (GO:0033275)	3/38	0.672379	0.988946	11.3378	-0.126022	DES;MYBPC2;MYL3
muscle filament sliding (GO:0030049)	3/38	0.672379	0.988946	11.3492	-0.126149	DES;MYBPC2;MYL3
negative regulation of Ras protein signal transduction (GO:0046580)	3/38	0.672379	0.988946	11.3809	-0.126502	RASAL1;MAPKAP1;FBP1
positive regulation of ion transmembrane transport (GO:0034767)	10/72	0.140082	0.733379	0.408347	-0.126625	TESC;PDGFB;ANK2;ANK3;PLCG2;SLC34A1;PDGFRB;PDZK1;GLRX;CALM1
nucleoside diphosphate metabolic process (GO:0009132)	3/39	0.688378	0.988946	11.4035	-0.126753	RRM2;AK2;AK4
negative regulation of hormone secretion (GO:0046888)	6/57	0.425144	0.971016	4.3339	-0.127471	IL6;CRHBP;SYTL4;PARK2;HADH;IL11
antigen processing and presentation of peptide antigen via MHC class II (GO:0002495)	12/94	0.167497	0.77624	0.505093	-0.127936	SEC23A;KIF4A;AP1M1;KIF5A;OSBPL1A;LGMN;DYNC2H1;CTSE;UNC93B1;SAR1B;KIF3C;HLA-DQA1
alditol phosphate metabolic process (GO:0052646)	3/35	0.620806	0.988946	11.5727	-0.128634	GPD1L;GPD1;GK3P
regulation of cysteine-type endopeptidase activity (GO:2000116)	22/197	0.20192	0.78572	0.534412	-0.128876	SH3RF1;IL6;AIFM1;TNFSF15;SOX7;RPS27L;SFN;BCL2L13;BIRC2;RPS6KA3;MAP3K5;UACA;P2RX1;VEGFA;PYCARD;HSPE1;FABP1;HSPD1;MYC;CTSH;DPEP1;F2R
positive regulation of extrinsic apoptotic signaling pathway (GO:2001238)	6/57	0.425144	0.971016	4.43437	-0.130426	TNFRSF12A;TRPS1;PYCARD;G0S2;SKIL;BMPR1B
protein O-linked glycosylation (GO:0006493)	11/83	0.154613	0.76297	0.48358	-0.130826	ST3GAL1;ST8SIA6;GALNT6;B3GNT3;GALNT11;MUC13;ST6GALNAC2;C1GALT1;GALNT13;MUC12;B4GALT5
axon cargo transport (GO:0008088)	3/40	0.703784	0.988946	11.9094	-0.132376	KIF4A;MAPT;SOD1
positive regulation of gene expression, epigenetic (GO:0045815)	1/16	0.770679	0.996598	39.1405	-0.133369	HMGA1
regulation of protein serine/threonine kinase activity (GO:0071900)	43/416	0.220349	0.805868	0.619413	-0.133691	ALS2;PDGFB;C5;EZH2;IQGAP3;TNFSF15;ZEB2;SFN;KIT;DAB2;MAP3K5;APOE;C1QTNF2;PYCARD;SPRED1;FGF2;GHR;IRAK2;NOX4;IRAK1;FLT1;CCNH;ITGA1;CHI3L1;MAPK10;SOD1;FZD5;GRM1;PKIA;PLCE1;WNT7B;DUSP2;CCND3;PLK1;HIPK3;VEGFA;PDGFRB;DUSP9;CHORDC1;GADD45B;GADD45A;LRP5;CALM1
positive regulation of protein maturation (GO:1903319)	26/240	0.216611	0.805868	0.625861	-0.135083	TNFSF15;RPS27L;SOX7;MAP3K5;DAB2;APOE;KLKB1;PYCARD;NSMCE2;HSPE1;MYC;CR1;HPN;AIFM1;PARK2;BCL2L13;PCOLCE2;RNF180;UACA;P2RX1;PLK1;MGEA5;SH3D19;HSPD1;CTSH;F2R
nervous system development (GO:0007399)	27/277	0.383524	0.932406	2.03902	-0.142704	FGF18;GDA;ACHE;FGF14;LPPR1;CAMK2G;ZEB2;SPOCK1;MYLIP;MDK;EPHB2;SEMA5A;TPP1;DLG4;APBA2;VPS13A;ATOH8;KCNQ2;FGF2;DCLK1;GLRB;SEMA6B;CHRDL1;MAP1S;VEGFA;CNTN3;FEZ1
polysaccharide biosynthetic process (GO:0000271)	5/47	0.434654	0.973703	5.36541	-0.142983	ACADM;NR1D1;HAS2;CERCAM;UGP2
epithelial cell proliferation (GO:0050673)	10/73	0.1482	0.74675	0.491656	-0.143576	SEMA5A;MTSS1;IL6;PDGFB;HMOX1;FERMT1;TFAP2C;KIT;SOX9;EPHA2
extracellular matrix organization (GO:0030198)	37/359	0.245632	0.839925	0.831258	-0.145007	PDGFB;SPOCK2;LUM;ADAMTSL4;ITGB4;POSTN;DCN;SOX9;WT1;TTR;PLOD1;P4HA1;KLKB1;SERPINE1;LOX;AGRN;FGF2;GFOD2;HPN;TGFBR1;ITGA1;SPARC;NDNF;PLG;KDR;ATP7A;ITGA6;SULF2;FBLN2;ITGA8;SULF1;HAS2;FOXC1;LAMC2;CTSB;ADAMTS5;ADAM15
cellular response to starvation (GO:0009267)	10/74	0.156551	0.768416	0.553373	-0.145772	ATG2B;WDFY3;DNAJC15;ALB;CPEB4;ATG7;RRP8;SLC39A5;TNRC6A;HDAC6
response to interferon-gamma (GO:0034341)	11/108	0.399728	0.950715	2.88964	-0.146045	SLC26A6;KYNU;ASS1;AIF1;SOCS3;CAMK2G;CD58;MT2A;SLC30A8;HLA-DQA1;GCH1
exocytosis (GO:0006887)	23/233	0.375319	0.932406	2.11885	-0.148291	GLRB;STX3;STX7;PDGFB;CRHBP;F13A1;CCR1;KIT;SPARC;SOD1;PCLO;PLG;RAB31;ALB;VEGFA;SERPINE1;PPP3CB;SYTL4;PLCD4;SYTL5;STEAP2;PROS1;CALM1
response to decreased oxygen levels (GO:0036293)	24/245	0.384725	0.932406	2.19965	-0.153946	NOX4;ACAA2;PPARA;IRAK1;EPAS1;PDGFB;CPEB4;BIRC2;AGTRAP;ITPR2;MTHFR;PTGIS;PLOD1;HMOX1;P2RX3;VEGFA;PKLR;ABAT;TGFBR3;NDRG1;FABP1;CAT;ANGPT2;DPP4
regulation of MAP kinase activity (GO:0043405)	29/273	0.229341	0.805868	0.723038	-0.156057	PDGFB;C5;EZH2;IQGAP3;ZEB2;KIT;MAP3K5;DAB2;APOE;C1QTNF2;SPRED1;FGF2;GHR;IRAK2;NOX4;IRAK1;FLT1;ITGA1;MAPK10;SOD1;FZD5;GRM1;PLCE1;WNT7B;DUSP2;HIPK3;VEGFA;PDGFRB;DUSP9
folic acid-containing compound metabolic process (GO:0006760)	6/25	0.0393377	0.429298	0.187728	-0.158743	SHMT1;MTHFS;FOLH1;MTHFR;PIPOX;GCH1
regulation of cell proliferation involved in heart morphogenesis (GO:2000136)	1/15	0.749917	0.994853	31.4121	-0.162084	SOX9
anterior/posterior pattern specification (GO:0009952)	17/150	0.222175	0.805868	0.757661	-0.16353	RARG;TGFBR1;ZEB2;GLI3;WT1;HOXD11;MIB1;HOXA1;HOXB8;ROR2;FOXC1;PBX1;HOXB9;SOX17;PCSK5;LRP5;ALX1
regulation of JNK cascade (GO:0046328)	15/148	0.376062	0.932406	2.33688	-0.16355	SH3RF1;TNIK;EDA2R;ZEB2;PARK2;ULK4;FZD5;IGF1R;DAB2;MAP3K5;WNT7B;HIPK3;PYCARD;GADD45B;GADD45A
positive regulation of peptide secretion (GO:0002793)	7/67	0.416642	0.957671	3.80077	-0.164386	GLUD1;PFKFB2;BLK;MGEA5;PPP3CB;SLC30A8;PCK2
regulation of response to food (GO:0032095)	1/15	0.749917	0.994853	31.9241	-0.164726	PPARA
regulation of protein binding (GO:0043393)	13/128	0.387269	0.932406	2.41896	-0.169295	PLCL2;PPARA;DAB2;MFNG;PCBD1;PLK1;TGFBR1;TGFBR3;SLPI;MAPK8;ATR;CAPRIN2;ADAM15
regulation of stress-activated protein kinase signaling cascade (GO:0070302)	17/171	0.391488	0.934217	2.49146	-0.169535	SH3RF1;TNIK;EDA2R;ZEB2;PARK2;ULK4;FZD5;IGF1R;DAB2;MAP3K5;WNT7B;HIPK3;VEGFA;PYCARD;GADD45B;MYC;GADD45A
regulation of smooth muscle cell apoptotic process (GO:0034391)	1/15	0.749917	0.994853	32.8829	-0.169673	APOH
regulation of response to wounding (GO:1903034)	34/347	0.352303	0.913764	1.89847	-0.171208	PDGFB;FOXA2;TNFRSF12A;C5;CD109;ACP5;SHPK;PSMB4;PTGIS;APOD;SERPINE2;APOE;KLKB1;GPX4;SERPINE1;APOH;MGLL;FGF2;NT5E;ANO6;CR1;IL6;C4A;IL1RL1;ASIC2;BIRC2;PLG;UACA;SERPINF1;SLC7A2;ACE2;CYP4F2;PROS1;F2R
regulation of norepinephrine secretion (GO:0014061)	1/15	0.749917	0.994853	33.2819	-0.171732	C5
cellular process involved in reproduction in multicellular organism (GO:0022412)	23/228	0.339258	0.90813	1.79467	-0.172947	DZIP1;TGFBR1;ZFX;PAQR7;PDE3A;KIT;CABYR;WT1;SLIT2;SLIT3;PAQR5;SLC26A6;SPAG6;SERPINA5;PYGO1;MAP7;FOXC1;DND1;PPAP2B;ANGPT2;ASPM;FANCC;ACVR1
brain development (GO:0007420)	19/187	0.348398	0.913764	1.92113	-0.173252	TSPAN2;FOXJ1;MDGA1;AK2;AK4;FZD5;FRZB;GRHL2;ACAT1;IGF1R;SLC23A1;APOD;HNMT;MAP1S;ITGA8;GPR56;FOXC1;SEPP1;ALX1
branch elongation of an epithelium (GO:0060602)	1/14	0.727276	0.994853	33.609	-0.17342	FGF1
negative regulation of interleukin-12 production (GO:0032695)	1/15	0.749917	0.994853	33.7123	-0.173953	ACP5
DNA-templated transcription, initiation (GO:0006352)	22/220	0.358048	0.916052	1.98626	-0.174159	PPARA;AR;RARG;CCNH;USP9X;RXRA;PPM1A;RORC;TEAD2;NR3C1;HNF4G;MED10;VDR;NR1D1;HNF4A;TRIM33;SERPINE1;TEAD4;SKIL;MYC;NR1H4;NAT14
regulation of mitochondrial depolarization (GO:0051900)	1/15	0.749917	0.994853	33.8001	-0.174406	MGEA5
craniofacial suture morphogenesis (GO:0097094)	1/15	0.749917	0.994853	33.8337	-0.174579	GLI3
regulation of catecholamine metabolic process (GO:0042069)	1/15	0.749917	0.994853	33.8878	-0.174858	MAOB
regulation of mesoderm development (GO:2000380)	1/15	0.749917	0.994853	33.9347	-0.1751	SOX17
regulation of dopamine metabolic process (GO:0042053)	1/15	0.749917	0.994853	34.4078	-0.177542	MAOB
negative regulation of cyclase activity (GO:0031280)	2/25	0.667921	0.988946	16.0399	-0.178287	NPR3;PDZD3
negative regulation of peptidase activity (GO:0010466)	24/230	0.281127	0.864976	1.23188	-0.178689	SH3RF1;CR1;IL6;C4A;C5;CD109;BIRC6;SPOCK1;SFN;SERPINI1;RPS6KA3;SERPINF1;SERPINE2;SERPINA6;CPAMD8;SERPINA5;SERPINA4;VEGFA;SERPINE1;SERPINB7;SLPI;FABP1;PROS1;DPEP1
positive regulation of interleukin-8 production (GO:0032757)	4/37	0.445574	0.973703	6.71187	-0.178865	CD58;SERPINE1;PYCARD;F2R
negative regulation of lyase activity (GO:0051350)	2/26	0.68749	0.988946	16.1377	-0.179375	NPR3;PDZD3
positive regulation of dephosphorylation (GO:0035306)	4/37	0.445574	0.973703	6.75775	-0.180087	MAGI2;ITGA1;PDGFRB;CALM1
ossification (GO:0001503)	12/116	0.372656	0.931745	2.54842	-0.180163	ALPL;IGSF10;MINPP1;FGF18;CHRDL1;SLC34A1;FSTL3;MAPK8;FOXC1;SPARC;SOX9;CDH11
positive regulation of epidermis development (GO:0045684)	2/26	0.68749	0.988946	16.2631	-0.180768	VDR;SFN
cellular response to lithium ion (GO:0071285)	1/15	0.749917	0.994853	35.0532	-0.180872	NFATC3
thyroid gland development (GO:0030878)	2/19	0.529534	0.988946	16.2963	-0.181137	FGF8;FOXE1
positive regulation of leukocyte chemotaxis (GO:0002690)	6/56	0.40997	0.957671	4.1906	-0.181246	IL6;AIF1;CCR1;VEGFA;SERPINE1;S100A14
negative regulation of tissue remodeling (GO:0034104)	1/14	0.727276	0.994853	35.14	-0.181319	VEGFA
anterior/posterior axis specification (GO:0009948)	4/37	0.445574	0.973703	6.80876	-0.181447	KDM6A;HEY1;FOXA2;FZD5
positive regulation of heart growth (GO:0060421)	2/25	0.667921	0.988946	16.355	-0.18179	FGF2;WT1
cognition (GO:0050890)	24/227	0.261678	0.842708	1.06602	-0.182433	GPR155;GPR162;GM2A;LRRN4;ADCY8;CRHBP;SYNJ1;PARK2;KIT;ITPR3;MDK;CALB1;EPHB2;HOXA1;NLGN4Y;SERPINF1;PPP1R1B;ITGA8;PPP3CB;DLG4;STRA6;PRNP;CHL1;NQO2
convergent extension (GO:0060026)	1/15	0.749917	0.994853	35.4113	-0.18272	FRZB
regulation of heart morphogenesis (GO:2000826)	2/20	0.555121	0.988946	16.4452	-0.182792	FOXC1;SOX9
negative regulation of mRNA splicing, via spliceosome (GO:0048025)	1/15	0.749917	0.994853	35.4503	-0.182921	SAP18
positive regulation of T cell migration (GO:2000406)	2/20	0.555121	0.988946	16.4881	-0.183269	AIF1;PYCARD
regulation of voltage-gated calcium channel activity (GO:1901385)	1/14	0.727276	0.994853	35.53	-0.183332	CALM1
Golgi vesicle transport (GO:0048193)	22/202	0.23284	0.812077	0.881586	-0.183511	SEC23A;AP1M1;STX7;ATL2;SNX1;FTH1;LAMP1;RAB31;KRT18;ANK3;TBC1D14;SURF4;SPTBN1;VPS13A;GOSR2;SH3D19;SAR1B;CUX1;STEAP2;GOLGA4;KLHL20;FTL
regulation of osteoblast differentiation (GO:0045667)	11/106	0.378034	0.932406	2.63952	-0.184731	IL6;WNT7B;HEY1;FAM20C;PIAS2;SNAI2;BMPR1B;GLI3;LRP5;ACVR1;IGFBP5
positive regulation of neurotransmitter transport (GO:0051590)	1/15	0.749917	0.994853	35.8109	-0.184782	STX1B
regulation of organ formation (GO:0003156)	6/29	0.0656243	0.568142	0.326895	-0.184821	FGF8;SULF1;FGF1;FGF3;WT1;HOXD11
muscle cell differentiation (GO:0042692)	14/119	0.212585	0.805868	0.856505	-0.184864	FGF6;NOX4;GPR162;ACADM;RXRA;CDH2;NEO1;SOX9;WNT7B;PTPLA;IFRD1;NFATC3;IGFBP5;ACVR1
regulation of hematopoietic progenitor cell differentiation (GO:1901532)	2/25	0.667921	0.988946	16.6331	-0.18488	N4BP2L2;TESC
transforming growth factor beta receptor signaling pathway (GO:0007179)	14/134	0.343803	0.912229	2.01776	-0.18536	PARD6A;PDGFB;USP9Y;TGFBR1;USP9X;PPM1A;TRIM33;SERPINE1;PDGFRB;TGFBR3;SKIL;HPGD;MYC;ACVR1
regulation of astrocyte differentiation (GO:0048710)	2/24	0.647373	0.988946	16.6845	-0.185451	SERPINE2;CLCF1
regulation of dendrite morphogenesis (GO:0048814)	6/56	0.40997	0.957671	4.29997	-0.185977	ACHE;PTPRD;TNIK;NEDD4;CUX1;CAPRIN2
regeneration (GO:0031099)	10/97	0.395112	0.941335	3.07779	-0.186073	NREP;APOD;MKI67;GATM;APOE;TGFBR3;ANGPT2;CHL1;NNMT;ADAM15
positive regulation of axonogenesis (GO:0050772)	8/51	0.112815	0.674131	0.472658	-0.186384	SEMA5A;TNFRSF12A;APOE;MAPT;VEGFA;SKIL;SLIT2;ISLR2
regulation of thymocyte apoptotic process (GO:0070243)	1/15	0.749917	0.994853	36.1247	-0.1864	RORC
positive regulation of natural killer cell mediated immunity (GO:0002717)	2/19	0.529534	0.988946	16.7718	-0.186423	LAMP1;CD226
macrophage differentiation (GO:0030225)	1/15	0.749917	0.994853	36.1312	-0.186434	VEGFA
regulation of action potential (GO:0098900)	1/15	0.749917	0.994853	36.1597	-0.186581	ANK3
positive regulation of JAK-STAT cascade (GO:0046427)	6/56	0.40997	0.957671	4.31727	-0.186725	IL6;CLCF1;STRA6;KIT;GHR;F2R
response to prostaglandin E (GO:0034695)	1/14	0.727276	0.994853	36.3226	-0.187422	TGFBR3
negative regulation of B cell proliferation (GO:0030889)	1/15	0.749917	0.994853	36.3437	-0.18753	TNFRSF21
regulation of systemic arterial blood pressure by hormone (GO:0001990)	2/23	0.625827	0.988946	16.8715	-0.187531	ACE2;ENPEP
circadian sleep/wake cycle process (GO:0022410)	2/20	0.555121	0.988946	16.8732	-0.18755	IL6;ALB
positive regulation of acute inflammatory response (GO:0002675)	2/26	0.68749	0.988946	16.8896	-0.187731	IL6;KLKB1
regulation of tyrosine phosphorylation of Stat5 protein (GO:0042522)	2/19	0.529534	0.988946	16.8961	-0.187804	KIT;GHR
positive regulation of glycogen biosynthetic process (GO:0045725)	1/15	0.749917	0.994853	36.4066	-0.187855	C1QTNF2
positive regulation of osteoclast differentiation (GO:0045672)	2/22	0.603273	0.988946	16.9313	-0.188195	CCR1;CA2
negative regulation of cation channel activity (GO:2001258)	2/18	0.502961	0.988946	16.9452	-0.188349	CASQ2;CALM1
female genitalia development (GO:0030540)	1/15	0.749917	0.994853	36.5383	-0.188535	STRA6
detection of external stimulus (GO:0009581)	19/175	0.256939	0.842708	1.10307	-0.188774	TRPM3;HPN;LDLR;ASIC2;PCDH15;KIT;ABCA4;CNGA1;TTR;DHRS3;SERPINE2;APOE;GPC6;APOC3;STRA6;AGRN;LRP2;DENND5B;CALM1
positive regulation of proteolysis (GO:0045862)	24/228	0.268101	0.85177	1.17814	-0.18902	CR1;AIFM1;TNFSF15;SOX7;RPS27L;PARK2;BCL2L13;PCOLCE2;RNF180;DAB2;MAP3K5;UACA;P2RX1;APOE;PLK1;MGEA5;PYCARD;NSMCE2;HSPE1;HSPD1;SH3D19;MYC;CTSH;F2R
positive regulation of positive chemotaxis (GO:0050927)	2/26	0.68749	0.988946	17.0063	-0.189029	VEGFA;KDR
negative regulation of interferon-gamma production (GO:0032689)	2/27	0.7061	0.988946	17.0075	-0.189042	IL1RL1;PRNP
generation of precursor metabolites and energy (GO:0006091)	37/375	0.32949	0.892717	1.6669	-0.189169	ACOX1;GNPDA1;FASTKD2;ENPP1;ADCY8;ADPGK;PFKFB2;OGDHL;ALDOB;SLC37A4;PHKA1;OGDH;MTFR1;NR1D1;SLC2A2;CAT;DHTKD1;MYC;NFATC3;ACADM;ACO2;KL;MLXIPL;NDUFC2;AK2;ITPR3;CACNA2D2;ITPR2;G6PC;SLC25A13;ADCY9;GFPT2;PKLR;UGP2;GPR116;CALM1;XYLB
microtubule nucleation (GO:0007020)	1/15	0.749917	0.994853	36.6737	-0.189234	TUBG2
T cell differentiation involved in immune response (GO:0002292)	2/17	0.475435	0.988946	17.0358	-0.189357	ATP7A;RORC
magnesium ion transport (GO:0015693)	1/15	0.749917	0.994853	36.7209	-0.189477	CNNM2
positive regulation of immunoglobulin mediated immune response (GO:0002891)	2/27	0.7061	0.988946	17.0777	-0.189822	CLCF1;CD226
positive regulation of lymphocyte migration (GO:2000403)	2/24	0.647373	0.988946	17.0785	-0.189831	AIF1;PYCARD
positive regulation of cell junction assembly (GO:1901890)	2/18	0.502961	0.988946	17.0819	-0.189869	VEGFA;KDR
ventricular septum development (GO:0003281)	2/18	0.502961	0.988946	17.1065	-0.190143	HEG1;STRA6
response to lithium ion (GO:0010226)	2/25	0.667921	0.988946	17.115	-0.190237	PKLR;NFATC3
positive regulation of focal adhesion assembly (GO:0051894)	2/18	0.502961	0.988946	17.1169	-0.190258	VEGFA;KDR
regulation of non-canonical Wnt signaling pathway (GO:2000050)	1/14	0.727276	0.994853	36.8746	-0.19027	DAB2
regulation of lamellipodium assembly (GO:0010591)	2/22	0.603273	0.988946	17.124	-0.190337	SLIT2;EPHA2
cellular response to toxic substance (GO:0097237)	2/18	0.502961	0.988946	17.1328	-0.190436	CYP17A1;PARK2
secondary metabolic process (GO:0019748)	7/40	0.0909193	0.628716	0.410554	-0.190528	DDC;FMO1;FMO2;AS3MT;EPHX2;CBR4;BDH2
negative regulation of calcium ion transmembrane transporter activity (GO:1901020)	2/18	0.502961	0.988946	17.1438	-0.190558	CASQ2;CALM1
lysosome localization (GO:0032418)	2/19	0.529534	0.988946	17.1561	-0.190694	KIT;HDAC6
positive regulation of Rap GTPase activity (GO:0032854)	1/14	0.727276	0.994853	36.9652	-0.190737	RASGRP3
regulation of protein homooligomerization (GO:0032462)	1/15	0.749917	0.994853	36.978	-0.190804	PEX5
digestive tract development (GO:0048565)	8/54	0.139158	0.733379	0.616298	-0.191109	ITGA6;ASS1;ITGB4;STRA6;KIT;PCSK5;GLI3;NR1H4
negative regulation of embryonic development (GO:0045992)	2/24	0.647373	0.988946	17.2296	-0.191511	SULF1;SOX17
detection of abiotic stimulus (GO:0009582)	19/178	0.278946	0.864554	1.31765	-0.191772	TRPM3;HPN;LDLR;ASIC2;PCDH15;KIT;ABCA4;CNGA1;TTR;DHRS3;SERPINE2;APOE;GPC6;APOC3;STRA6;AGRN;LRP2;DENND5B;CALM1
ether metabolic process (GO:0018904)	1/15	0.749917	0.994853	37.1721	-0.191805	TXN
regulation of protein insertion into mitochondrial membrane involved in apoptotic signaling pathway (GO:1900739)	2/27	0.7061	0.988946	17.2673	-0.19193	MAPK8;SFN
transmembrane receptor protein serine/threonine kinase signaling pathway (GO:0007178)	20/196	0.336465	0.90175	1.85616	-0.19196	PARD6A;IRAK1;FGF8;PDGFB;USP9Y;TGFBR1;USP9X;PPM1A;CHRDL1;TRIM33;TRPS1;SERPINE1;PDGFRB;TGFBR3;SKIL;BMPR1B;MYC;FAM83G;HPGD;ACVR1
regulation of leukocyte degranulation (GO:0043300)	2/25	0.667921	0.988946	17.2746	-0.192011	LAMP1;HMOX1
mammary gland alveolus development (GO:0060749)	2/18	0.502961	0.988946	17.2906	-0.192189	PRLR;VEGFA
regulation of membrane protein ectodomain proteolysis (GO:0051043)	2/19	0.529534	0.988946	17.3212	-0.192529	APOE;SH3D19
response to cold (GO:0009409)	4/36	0.426558	0.971016	6.56446	-0.193077	IL6;ACADM;P2RX3;VEGFA
behavioral defense response (GO:0002209)	2/24	0.647373	0.988946	17.3774	-0.193154	ALS2;MDK
regulation of fatty acid transport (GO:2000191)	2/23	0.625827	0.988946	17.3911	-0.193306	CYP4F2;PLA2R1
phosphatidylinositol-3-phosphate biosynthetic process (GO:0036092)	1/15	0.749917	0.994853	37.4655	-0.193319	PIKFYVE
CD4-positive, alpha-beta T cell activation (GO:0035710)	2/25	0.667921	0.988946	17.3995	-0.193399	ATP7A;RORC
regulation of execution phase of apoptosis (GO:1900117)	2/19	0.529534	0.988946	17.4132	-0.193551	PTGIS;AIFM1
response to testosterone (GO:0033574)	2/25	0.667921	0.988946	17.414	-0.193561	PSPH;TPMT
cellular response to radiation (GO:0071478)	13/126	0.367516	0.922038	2.38623	-0.193686	NOX4;TRPM3;MME;ATR;SNAI2;CNGA1;NEDD4;GADD45A;MYC;PIK3R1;TP53INP1;CALM1;NET1
peroxisome organization (GO:0007031)	2/25	0.667921	0.988946	17.4293	-0.19373	PEX5;SCP2
regulation of necrotic cell death (GO:0010939)	2/18	0.502961	0.988946	17.4354	-0.193798	ARHGEF2;BIRC2
positive regulation of immunoglobulin production (GO:0002639)	2/27	0.7061	0.988946	17.4419	-0.19387	IL6;CLCF1
regulation of neuron projection development (GO:0010975)	28/275	0.301677	0.874459	1.44528	-0.193884	ACHE;TNFRSF12A;SPOCK1;ULK4;EPHB3;EPHB2;SEMA5A;APOE;MAPT;SPG20;TRPV4;SKIL;ISLR2;PTPRD;MAGI2;TNIK;CCDC88A;PTPRO;NDNF;RUFY3;SLIT2;CAPRIN2;THY1;NEDD4;VEGFA;CUX1;DBN1;FEZ1
chondroitin sulfate biosynthetic process (GO:0030206)	2/25	0.667921	0.988946	17.4485	-0.193945	SLC35D1;DCN
protein sumoylation (GO:0016925)	2/27	0.7061	0.988946	17.452	-0.193983	NSMCE2;PIAS2
negative chemotaxis (GO:0050919)	2/19	0.529534	0.988946	17.4708	-0.194192	SLIT2;SLIT3
peptidyl-glutamic acid modification (GO:0018200)	2/25	0.667921	0.988946	17.5185	-0.194722	PROZ;PROS1
negative regulation of smooth muscle contraction (GO:0045986)	1/14	0.727276	0.994853	37.7474	-0.194774	SOD1
androgen biosynthetic process (GO:0006702)	1/15	0.749917	0.994853	37.7503	-0.194789	CYP17A1
neuron maturation (GO:0042551)	2/19	0.529534	0.988946	17.5533	-0.195109	IRX5;FARP2
regulation of catenin import into nucleus (GO:0035412)	2/23	0.625827	0.988946	17.5637	-0.195225	SEMA5A;SNAI2
regulation of extracellular matrix organization (GO:1903053)	2/18	0.502961	0.988946	17.5765	-0.195367	SOX9;DPP4
porphyrin-containing compound biosynthetic process (GO:0006779)	2/27	0.7061	0.988946	17.6046	-0.195679	ALAD;SLC25A38
monocyte differentiation (GO:0030224)	2/17	0.475435	0.988946	17.614	-0.195783	VEGFA;MT1G
blood coagulation, intrinsic pathway (GO:0007597)	2/18	0.502961	0.988946	17.6169	-0.195816	KLKB1;APOH
proteoglycan biosynthetic process (GO:0030166)	2/26	0.68749	0.988946	17.6212	-0.195864	GAL3ST3;GLCE
regulation of alcohol biosynthetic process (GO:1902930)	7/41	0.0992363	0.644875	0.44669	-0.195962	VDR;APOE;PTH1R;FGF1;SOD1;SNAI2;ABCG1
regulation of chemotaxis (GO:0050920)	14/120	0.2206	0.805868	0.908323	-0.196048	IL6;PDGFB;AIF1;CCR1;C5;S100A14;PTPRO;SLIT2;KDR;SEMA5A;SERPINE1;VEGFA;PDGFRB;ANGPT2
regulation of establishment of planar polarity (GO:0090175)	2/23	0.625827	0.988946	17.6389	-0.19606	MAGI2;ROR2
centrosome localization (GO:0051642)	1/14	0.727276	0.994853	38.0018	-0.196086	GPR162
regulation of toll-like receptor 4 signaling pathway (GO:0034143)	1/14	0.727276	0.994853	38.0306	-0.196235	NR1D1
cell differentiation involved in embryonic placenta development (GO:0060706)	2/23	0.625827	0.988946	17.6758	-0.196471	SOCS3;FZD5
multicellular organismal reproductive behavior (GO:0033057)	2/22	0.603273	0.988946	17.6772	-0.196486	PPP1R1B;ZFX
neural tube development (GO:0021915)	2/23	0.625827	0.988946	17.6798	-0.196515	FAM212A;EPHA2
positive regulation of response to extracellular stimulus (GO:0032106)	2/18	0.502961	0.988946	17.6903	-0.196632	WDFY3;ATG7
regulation of Cdc42 GTPase activity (GO:0043088)	2/20	0.555121	0.988946	17.717	-0.196929	EPHB3;BCAS3
hippo signaling (GO:0035329)	2/26	0.68749	0.988946	17.763	-0.19744	TEAD4;TEAD2
epithelial cell development (GO:0002064)	11/107	0.38887	0.932406	2.8243	-0.197663	WNT7B;RARG;MAGI2;PDGFB;FOXJ1;PODXL;NPHS2;MAP7;TFAP2C;SFN;SOX9
negative regulation of epidermis development (GO:0045683)	1/14	0.727276	0.994853	38.3435	-0.19785	EZH2
regulated secretory pathway (GO:0045055)	4/36	0.426558	0.971016	6.73436	-0.198074	RAB31;CRHBP;KIT;STEAP2
cellular protein catabolic process (GO:0044257)	2/19	0.529534	0.988946	17.8273	-0.198155	PARK2;DENND3
cellular response to epidermal growth factor stimulus (GO:0071364)	2/22	0.603273	0.988946	17.8285	-0.198168	SNAI2;SOX9
negative regulation of peptidyl-serine phosphorylation (GO:0033137)	2/17	0.475435	0.988946	17.9271	-0.199264	GPD1L;MLXIPL
macrophage activation (GO:0042116)	2/26	0.68749	0.988946	17.9291	-0.199287	AIF1;SLC7A2
positive regulation of organ growth (GO:0046622)	4/36	0.426558	0.971016	6.77594	-0.199297	FGF8;CACNA2D2;FGF2;WT1
regulation of neuron apoptotic process (GO:0043523)	20/188	0.276804	0.859128	1.31332	-0.19941	FGF8;ERBB3;CPEB4;LGMN;ITGA1;GRIK5;PARK2;NR3C1;SIX4;SOD1;MDK;NDNF;ATP7A;CLCF1;APOE;HMOX1;VEGFA;AGRN;CHL1;F2R
histone H3-K9 modification (GO:0061647)	1/14	0.727276	0.994853	38.6623	-0.199494	SUV39H1
epithelial tube branching involved in lung morphogenesis (GO:0060441)	2/20	0.555121	0.988946	17.9522	-0.199543	FOXA2;SOX9
negative regulation of secretion (GO:0051048)	17/152	0.236856	0.820096	1.00656	-0.199636	RHBDF2;TNFRSF21;IL6;ERBB3;CRHBP;C5;MAOB;RHBDF1;WNK1;PARK2;IL11;HMOX1;SYTL4;CYP4F2;PLA2R1;HADH;F2R
left/right axis specification (GO:0070986)	1/14	0.727276	0.994853	38.7032	-0.199706	DNAH5
negative regulation of axon extension (GO:0030517)	2/22	0.603273	0.988946	17.9931	-0.199998	SEMA5A;SLIT2
appendage development (GO:0048736)	2/19	0.529534	0.988946	18.0036	-0.200114	RAX;MEOX2
labyrinthine layer blood vessel development (GO:0060716)	2/19	0.529534	0.988946	18.0262	-0.200366	HEY1;FZD5
female gamete generation (GO:0007292)	4/37	0.445574	0.973703	7.52128	-0.200435	USP9X;PAQR7;ASPM;PAQR5
decidualization (GO:0046697)	2/18	0.502961	0.988946	18.0335	-0.200446	VDR;CTSB
lipid particle organization (GO:0034389)	1/14	0.727276	0.994853	38.8564	-0.200496	SPG20
positive regulation of response to biotic stimulus (GO:0002833)	2/24	0.647373	0.988946	18.0424	-0.200545	HSPD1;CD226
serotonin receptor signaling pathway (GO:0007210)	1/14	0.727276	0.994853	38.8945	-0.200693	HTR5A
regulation of digestive system process (GO:0044058)	2/26	0.68749	0.988946	18.0628	-0.200772	WNK1;SLC22A5
activation of protein kinase A activity (GO:0034199)	2/17	0.475435	0.988946	18.0689	-0.20084	ADCY9;ADCY8
NLS-bearing protein import into nucleus (GO:0006607)	1/14	0.727276	0.994853	39.0237	-0.201359	TRPS1
cellular response to transforming growth factor beta stimulus (GO:0071560)	18/166	0.265822	0.849008	1.23222	-0.201698	NOX4;PARD6A;PDGFB;USP9Y;TGFBR1;USP9X;PPM1A;PDE3A;SOX9;DAB2;TRIM33;SERPINE1;PDGFRB;TGFBR3;SKIL;MYC;HPGD;ACVR1
regulation of cGMP metabolic process (GO:0030823)	2/22	0.603273	0.988946	18.1674	-0.201935	APOE;PDZD3
synaptic transmission, cholinergic (GO:0007271)	2/17	0.475435	0.988946	18.2036	-0.202338	ACHE;APOE
transmission of nerve impulse (GO:0019226)	2/17	0.475435	0.988946	18.2297	-0.202627	SOD1;KCNQ2
deoxyribose phosphate catabolic process (GO:0046386)	2/19	0.529534	0.988946	18.2352	-0.202688	DERA;OGG1
regulation of synaptic vesicle exocytosis (GO:2000300)	2/18	0.502961	0.988946	18.2817	-0.203205	GRIK5;STX1B
regulation of sulfur metabolic process (GO:0042762)	2/17	0.475435	0.988946	18.3423	-0.203879	PDK2;BHMT
negative regulation of biomineral tissue development (GO:0070168)	2/18	0.502961	0.988946	18.3886	-0.204393	CCR1;SOX9
apoptotic DNA fragmentation (GO:0006309)	2/20	0.555121	0.988946	18.3904	-0.204414	MAP1S;AIFM1
negative regulation of cell morphogenesis involved in differentiation (GO:0010771)	11/88	0.196661	0.78572	0.849104	-0.204766	SEMA5A;HPN;FOXA2;SPG20;TGFBR3;PTPRO;RUFY3;SLIT2;PBLD;THY1;EPHB2
myeloid leukocyte migration (GO:0097529)	8/76	0.395962	0.942847	3.47994	-0.204797	IL6;FLT1;PDGFB;VEGFA;SLC37A4;ITGA1;KIT;PTPRO
lymphocyte apoptotic process (GO:0070227)	2/17	0.475435	0.988946	18.443	-0.204998	TNFRSF21;GLI3
regulation of myelination (GO:0031641)	2/25	0.667921	0.988946	18.4507	-0.205084	TNFRSF21;RARG
tRNA methylation (GO:0030488)	1/14	0.727276	0.994853	39.7661	-0.20519	TRMT61B
positive regulation of dendritic spine development (GO:0060999)	2/18	0.502961	0.988946	18.4695	-0.205292	APOE;CAPRIN2
negative regulation of response to extracellular stimulus (GO:0032105)	2/20	0.555121	0.988946	18.4877	-0.205496	PPARA;SNAI2
developmental maturation (GO:0021700)	16/154	0.335901	0.900787	1.96995	-0.205833	IRX5;EPAS1;FAM20C;PTH1R;PDE3A;FZD5;CABYR;KDR;FARP2;AGPAT6;SLC26A6;BHLHA15;REN;VEGFA;DLG4;LHX6
negative regulation of response to nutrient levels (GO:0032108)	2/20	0.555121	0.988946	18.5201	-0.205856	PPARA;SNAI2
icosanoid transport (GO:0071715)	2/17	0.475435	0.988946	18.5368	-0.206041	ABCC2;SLCO2B1
response to mechanical stimulus (GO:0009612)	19/176	0.264199	0.846283	1.23534	-0.206179	HPN;IL6;ASIC2;CHI3L1;PCDH15;DCN;KIT;SOX9;PSPH;SERPINE2;P2RX3;SFTPC;TRPV4;MAPK8;STRA6;CLCN6;DENND5B;GADD45A;ANGPT2
regulation of granulocyte differentiation (GO:0030852)	2/17	0.475435	0.988946	18.554	-0.206232	TESC;PRDM16
sprouting angiogenesis (GO:0002040)	2/24	0.647373	0.988946	18.559	-0.206288	FLT1;VEGFA
positive regulation of Notch signaling pathway (GO:0045747)	2/24	0.647373	0.988946	18.6462	-0.207256	MFNG;KIT
phosphatidylinositol dephosphorylation (GO:0046856)	2/17	0.475435	0.988946	18.648	-0.207277	SYNJ1;INPP5B
peptidyl-tyrosine phosphorylation (GO:0018108)	16/152	0.318722	0.886356	1.72152	-0.207678	FRK;FLT1;PDGFB;ERBB3;BLK;KIT;EPHB3;EPHA2;KDR;EPHB2;IGF1R;PRLR;PDGFRB;ROR2;F2R;GHR
histone mRNA catabolic process (GO:0071044)	1/14	0.727276	0.994853	40.289	-0.207888	PAPD5
adult behavior (GO:0030534)	15/141	0.313126	0.886356	1.72498	-0.208095	RNF180;PPARA;GLRB;FOXA2;FGF14;HOXB8;CRHBP;MAPT;ATG7;ABAT;PCDH15;PARK2;HOMER2;CHL1;KLHL1
phototransduction (GO:0007602)	13/109	0.210929	0.803981	0.95688	-0.208771	TTR;DHRS3;LDLR;APOE;GPC6;APOC3;ASIC2;STRA6;AGRN;ABCA4;LRP2;CNGA1;CALM1
ovarian follicle development (GO:0001541)	7/41	0.0992363	0.644875	0.476522	-0.209049	VEGFA;ZFX;FOXC1;PCYT1B;KIT;SOD1;KDR
mitochondrial calcium ion homeostasis (GO:0051560)	1/15	0.749917	0.994853	40.6416	-0.209708	MICU1
reciprocal meiotic recombination (GO:0007131)	2/27	0.7061	0.988946	18.869	-0.209733	MSH3;MSH5
ribonucleoside diphosphate metabolic process (GO:0009185)	2/17	0.475435	0.988946	18.8858	-0.209921	AK2;AK4
cellular response to gonadotropin stimulus (GO:0071371)	2/18	0.502961	0.988946	18.8934	-0.210004	CYP17A1;WT1
viral genome replication (GO:0019079)	2/18	0.502961	0.988946	18.9103	-0.210192	ATG7;NFIA
C21-steroid hormone metabolic process (GO:0008207)	2/21	0.579704	0.988946	19.0773	-0.212048	CYP17A1;SCP2
blastocyst development (GO:0001824)	2/19	0.529534	0.988946	19.1063	-0.212371	TGFBR1;TGFBR3
endosome organization (GO:0007032)	2/27	0.7061	0.988946	19.1274	-0.212606	PLEKHF1;ALS2
histone H4-K5 acetylation (GO:0043981)	1/15	0.749917	0.994853	41.2487	-0.21284	KANSL2
central nervous system development (GO:0007417)	13/108	0.202722	0.78572	0.882642	-0.212854	ARSB;RPS6KA3;BTD;FMR1;ASIC2;POU3F3;PDGFC;PARK2;SERPINI1;TAGLN3;NHEJ1;ALDH3A2;DCLK1
regulation of transcription involved in cell fate commitment (GO:0060850)	2/20	0.555121	0.988946	19.1749	-0.213134	RORC;SOX17
regulation of endothelial cell proliferation (GO:0001936)	11/88	0.196661	0.78572	0.885678	-0.213586	SEMA5A;PDGFB;LRG1;APOE;TGFBR1;VEGFA;SULF1;APOH;SPARC;FGF2;KDR
cellular response to light stimulus (GO:0071482)	9/85	0.377539	0.932406	3.06479	-0.214494	TRPM3;NEDD4;MME;ATR;MYC;PIK3R1;CNGA1;TP53INP1;CALM1
chromatin assembly (GO:0031497)	2/21	0.579704	0.988946	19.5294	-0.217073	HMGA1;HELLS
synaptonemal complex organization (GO:0070193)	2/21	0.579704	0.988946	19.6259	-0.218147	LEPREL4;SYCP2
aerobic respiration (GO:0009060)	2/22	0.603273	0.988946	19.8126	-0.220221	CAT;MTFR1
maintenance of location in cell (GO:0051651)	11/103	0.345747	0.913764	2.45026	-0.22097	EPB41L3;CEP350;ANK3;TLN2;APOE;ALB;GYPA;GRIK5;DBN1;FTH1;ASPM
alcohol biosynthetic process (GO:0046165)	11/104	0.356464	0.913764	2.45261	-0.221182	ACAA2;AGPAT6;ACHE;CYP27A1;PLCG2;PCYT1B;LPIN2;FGF2;SCP2;CHPT1;PCK1
ovulation cycle process (GO:0022602)	10/78	0.192174	0.78572	0.925274	-0.223135	VEGFA;ZFX;FOXC1;PCYT1B;KIT;SOD1;BMPR1B;SLIT2;SLIT3;KDR
germ cell development (GO:0007281)	13/121	0.318904	0.886356	1.8546	-0.223732	SPAG6;DZIP1;ZFX;PAQR7;MAP7;DND1;KIT;ANGPT2;WT1;ASPM;FANCC;PAQR5;ACVR1
response to temperature stimulus (GO:0009266)	14/122	0.237004	0.820096	1.14407	-0.226908	TRPM3;IL6;ACADM;MKI67;SOD1;TFEC;P2RX3;PKLR;VEGFA;TRPV4;ABCC2;FGF1;CD14;TP53INP1
regulation of DNA-templated transcription in response to stress (GO:0043620)	5/46	0.417865	0.957671	5.27475	-0.228137	RPS6KA3;EPAS1;NEDD4;HMOX1;VEGFA
phosphatidylinositol metabolic process (GO:0046488)	14/125	0.262476	0.842708	1.33445	-0.228371	SYNJ1;PIP5K1B;PI4KA;CWH43;SH3YL1;PIKFYVE;PLCG2;PDGFRB;PLCD4;PIP4K2A;FGF2;INPP5B;PIK3R1;IP6K2
dorsal/ventral pattern formation (GO:0009953)	9/66	0.167107	0.77525	0.900925	-0.229348	FGF8;GSC;FOXA2;TTC21B;DYNC2H1;MNX1;BMPR1B;GLI3;HOXD11
cellular polysaccharide biosynthetic process (GO:0033692)	5/46	0.417865	0.957671	5.36752	-0.232149	ACADM;NR1D1;HAS2;CERCAM;UGP2
protein localization to lysosome (GO:0061462)	1/14	0.727276	0.994853	45.2465	-0.233468	NEDD4
protein localization to vacuole (GO:0072665)	1/14	0.727276	0.994853	45.2937	-0.233712	NEDD4
positive regulation of mitotic cell cycle (GO:0045931)	12/103	0.244424	0.839925	1.34493	-0.234614	CDC7;IGF1R;FGF8;EIF4EBP1;PDGFB;AIF1;PLK1;PDGFRB;NSMCE2;PBX1;UBE2C;LRP5
response to estradiol (GO:0032355)	12/100	0.217387	0.805868	1.08986	-0.23523	ZNF703;PDGFB;ASS1;SSTR1;CRHBP;GPX4;SLC25A36;SLC34A1;PDGFRB;OGG1;HTR5A;GHR
neuron migration (GO:0001764)	13/116	0.272055	0.85177	1.47719	-0.236999	MDGA1;USP9X;PEX5;SPOCK1;FZD3;NDNF;MARK1;MAPT;MNX1;LHX6;ASPM;DCLK1;CHL1
central nervous system neuron axonogenesis (GO:0021955)	6/29	0.0656243	0.568142	0.422781	-0.239034	ATG7;EPHB3;TSKU;DCLK1;CDH11;EPHB2
positive regulation of cellular carbohydrate metabolic process (GO:0010676)	8/56	0.15828	0.769904	0.917224	-0.239844	GPD1;PPARA;PFKFB2;C1QTNF2;PTH1R;SMEK2;MLXIPL;ENTPD5
regulation of leukocyte migration (GO:0002685)	12/110	0.311742	0.886356	1.99941	-0.241201	IL6;APOD;AIF1;CCR1;HMOX1;C5;VEGFA;SERPINE1;PYCARD;CCL28;S100A14;SLIT2
centrosome organization (GO:0051297)	7/64	0.374828	0.932406	3.6189	-0.253274	OFD1;SLC16A1;PLK1;CEP135;HAUS7;SSX2IP;GADD45A
positive regulation of epithelial to mesenchymal transition (GO:0010718)	3/26	0.436255	0.973703	9.5488	-0.254466	DAB2;ZNF703;EZH2
regulation of cellular response to insulin stimulus (GO:1900076)	5/45	0.400995	0.950715	5.08308	-0.256904	ANKRD26;GRB10;OSBPL8;ENPP1;SOCS3
cellular response to ionizing radiation (GO:0071479)	5/45	0.400995	0.950715	5.13763	-0.259661	NOX4;ATR;SNAI2;GADD45A;NET1
muscle tissue development (GO:0060537)	11/97	0.282951	0.864976	1.80198	-0.261384	SRPK3;TCF21;MEOX2;MYL3;ITGA8;PDGFRB;STRA6;SIX4;DCN;SKIL;PPP1R13L
negative regulation of fibroblast proliferation (GO:0048147)	3/26	0.436255	0.973703	9.83977	-0.26222	DACH1;MYC;FTH1
regulation of humoral immune response (GO:0002920)	5/45	0.400995	0.950715	5.19205	-0.262411	CR1;C4A;FOXJ1;C5;PROS1
positive regulation of calcium ion transport (GO:0051928)	11/91	0.224078	0.805868	1.22126	-0.263592	F2RL3;PDGFB;ANK2;CCR1;P2RX3;PLCG2;MGEA5;PDGFRB;F2R;CALM1;THY1
regulation of nitric oxide biosynthetic process (GO:0045428)	7/44	0.126567	0.706775	0.761328	-0.264214	IL6;PTGIS;ASS1;ACP5;AGXT2;HBB;DDAH1
tube morphogenesis (GO:0035239)	11/101	0.324493	0.886356	2.20708	-0.266254	MIB1;MTSS1;FGF8;DLL4;TEAD2;SOX17;NR3C1;SOX9;KLHL3;FGF3;ACVR1
negative regulation of NF-kappaB transcription factor activity (GO:0032088)	7/65	0.388765	0.932406	3.8272	-0.267853	IRAK2;IRAK1;PTGIS;FOXJ1;PYCARD;COMMD1;CAT
carbohydrate transport (GO:0008643)	12/102	0.235273	0.816676	1.32292	-0.267908	SLC2A12;SLC5A2;SLC23A1;G6PC;SLC26A6;SLC2A11;HNF1A;SLC35D1;SLC37A1;SLC2A2;SLC37A4;SLC35B4
forebrain cell migration (GO:0021885)	7/43	0.117068	0.691357	0.730831	-0.269749	MDGA1;GPR56;PEX5;POU3F3;LHX6;OGDH;GLI3
telomere maintenance via recombination (GO:0000722)	3/26	0.436255	0.973703	10.1326	-0.270023	POLD3;NSMCE2;SMC6
regulation of blood vessel endothelial cell migration (GO:0043535)	7/45	0.136441	0.733379	0.881112	-0.273226	PDGFB;APOE;DLL4;VEGFA;ANGPT2;FGF2;EPHA2
cellular response to tumor necrosis factor (GO:0071356)	11/89	0.205631	0.78572	1.13383	-0.273428	TNFRSF21;GPD1;ARHGEF2;KRT18;ASS1;CRHBP;CD58;PYCARD;CHI3L1;EDA2R;HAS2
negative regulation of autophagy (GO:0010507)	3/26	0.436255	0.973703	10.3071	-0.274673	TBC1D14;RASIP1;HERC1
vasculature development (GO:0001944)	7/44	0.126567	0.706775	0.794856	-0.27585	TCF21;VEGFA;PDGFRB;FZD3;STRA6;FRZB;ANGPT2
negative regulation of endothelial cell migration (GO:0010596)	6/31	0.0818466	0.62711	0.59541	-0.277838	APOE;DLL4;APOH;ANGPT2;FGF2;SLIT2
regulation of fatty acid metabolic process (GO:0019217)	8/72	0.344411	0.913033	3.0559	-0.278037	PPARA;PDK2;ANKRD26;C1QTNF2;APOC3;MLXIPL;FABP3;FABP1
regulation of phospholipase activity (GO:0010517)	11/89	0.205631	0.78572	1.15338	-0.278143	FLT1;ADCY9;ADCY8;PDGFRB;KIT;ITPR3;ANGPTL3;PLA2R1;FGF2;CALM1;ITPR2
developmental growth involved in morphogenesis (GO:0060560)	10/79	0.201599	0.78572	1.17667	-0.283761	WNT7B;RARG;MAPT;USP9X;BNC2;PPP3CB;FGF1;SLIT2;DCLK1;SLIT3
peptide hormone secretion (GO:0030072)	6/54	0.379533	0.932406	4.05622	-0.283881	IL6;HNF1A;CAMK2G;TRPV4;SLC30A8;PCLO
regulation of protein complex disassembly (GO:0043244)	10/80	0.211217	0.804271	1.30478	-0.284206	SEMA5A;ARHGEF2;SYNJ1;HRSP12;MGEA5;PDXP;SPTBN1;TRPV4;EML4;HDAC6
cyclic nucleotide metabolic process (GO:0009187)	8/58	0.17856	0.78572	1.18051	-0.284685	ADCY9;ADCY8;PDE7A;PDE4A;PDE3B;PDE10A;PDE3A;PDE8A
homeostasis of number of cells (GO:0048872)	11/96	0.272817	0.85177	1.78269	-0.286014	HMOX1;ZFX;SLC37A4;PPP3CB;MAP7;SLC22A5;SKIL;SOD1;SLC40A1;F2R;FANCC
positive regulation of cation channel activity (GO:2001259)	3/26	0.436255	0.973703	10.7506	-0.286493	ANK2;PLCG2;CALM1
negative regulation of neuron projection development (GO:0010977)	10/91	0.327121	0.88972	2.45875	-0.287301	SEMA5A;APOE;SPG20;TRPV4;SPOCK1;PTPRO;RUFY3;SLIT2;THY1;EPHB2
negative regulation of T cell differentiation (GO:0045581)	3/26	0.436255	0.973703	10.857	-0.289328	FOXJ1;DTX1;GLI3
neural nucleus development (GO:0048857)	7/63	0.360917	0.921249	3.55214	-0.291364	HOXA1;GLUD1;MAPKAP1;ALDH1A3;MAOB;FZD3;CALM1
phosphatidylinositol biosynthetic process (GO:0006661)	10/81	0.221019	0.805868	1.35548	-0.292561	CWH43;SH3YL1;SYNJ1;PLCG2;PIKFYVE;PIP5K1B;PI4KA;PIP4K2A;FGF2;PIK3R1
regulation of polysaccharide biosynthetic process (GO:0032885)	4/35	0.407379	0.957671	6.77158	-0.292876	GRB10;PDGFB;ENPP1;C1QTNF2
positive regulation of smooth muscle cell proliferation (GO:0048661)	7/46	0.14668	0.74675	1.00306	-0.292918	IRAK1;IL6;PDGFB;AIF1;HMOX1;VEGFA;PDGFRB
sphingolipid biosynthetic process (GO:0030148)	7/63	0.360917	0.921249	3.58705	-0.294227	ST8SIA6;P2RX1;PPAP2C;COL4A3BP;SPTSSB;PPAP2B;DEGS2
cellular hormone metabolic process (GO:0034754)	11/95	0.262801	0.842952	1.72349	-0.294452	SCPEP1;HSD17B11;ALDH8A1;TTR;CYP17A1;DHRS3;ALDH1A3;STRA6;SCP2;UGT2B7;RETSAT
positive regulation of vasodilation (GO:0045909)	3/26	0.436255	0.973703	11.0666	-0.294915	SCPEP1;HMOX1;EPHX2
ketone biosynthetic process (GO:0042181)	3/26	0.436255	0.973703	11.0877	-0.295475	CYP4F2;PDSS1;SCP2
maternal process involved in female pregnancy (GO:0060135)	4/35	0.407379	0.957671	6.83195	-0.295487	VDR;RXRA;ANGPT2;STOX2
amide transport (GO:0042886)	10/83	0.24114	0.831792	1.61474	-0.297391	SLC38A3;IL6;HNF1A;CAMK2G;SLC22A8;TRPV4;ABCA1;SLC30A8;SLC9A3R1;PCLO
insulin secretion (GO:0030073)	4/35	0.407379	0.957671	6.95772	-0.300926	HNF1A;CAMK2G;SLC30A8;PCLO
platelet degranulation (GO:0002576)	10/81	0.221019	0.805868	1.40508	-0.303266	PDGFB;ALB;F13A1;VEGFA;SERPINE1;SPARC;SOD1;PROS1;PLG;CALM1
positive regulation of phospholipase activity (GO:0010518)	9/80	0.317712	0.886356	2.52541	-0.304656	FLT1;ADCY9;ADCY8;PDGFRB;KIT;ITPR3;FGF2;CALM1;ITPR2
tube closure (GO:0060606)	9/77	0.28281	0.864976	2.11369	-0.306598	KDM6A;RARG;PHACTR4;FZD3;TEAD2;LIAS;ZEB2;GRHL2;ALX1
ribonucleoside bisphosphate metabolic process (GO:0033875)	4/35	0.407379	0.957671	7.18703	-0.310844	ENPP1;PANK1;SULT2B1;SULT1C2
liver development (GO:0001889)	10/86	0.272476	0.85177	1.94516	-0.312079	ACADM;ASS1;ATG7;QDPR;TGFBR3;AK2;AK4;SLCO2B1;ACAT1;HMGCL
positive regulation of Wnt signaling pathway (GO:0030177)	10/86	0.272476	0.85177	1.9459	-0.312199	ATP6V1C2;DAB2;SULF2;SULF1;PPM1A;ROR2;ZEB2;RNF146;ASPM;CAPRIN2
nucleoside bisphosphate metabolic process (GO:0033865)	4/35	0.407379	0.957671	7.22976	-0.312692	ENPP1;PANK1;SULT2B1;SULT1C2
negative regulation of leukocyte differentiation (GO:1902106)	9/74	0.249061	0.840868	1.8231	-0.31598	FOXJ1;DTX1;FSTL3;PRDM16;MYC;GLI3;PIK3R1;TMEM176B;TMEM176A
neural tube closure (GO:0001843)	9/76	0.271416	0.85177	2.02014	-0.32411	KDM6A;RARG;PHACTR4;FZD3;TEAD2;LIAS;ZEB2;GRHL2;ALX1
biomineral tissue development (GO:0031214)	8/71	0.331649	0.894883	2.9468	-0.327279	ALPL;MINPP1;PPARA;MTSS1;ENPP1;PTH1R;FAM20C;ANO6
body fluid secretion (GO:0007589)	8/71	0.331649	0.894883	3.01068	-0.334373	ATP7A;VDR;AGPAT6;PRLR;VEGFA;SLC22A4;NPR3;CDO1
odontogenesis of dentin-containing tooth (GO:0042475)	8/69	0.306381	0.881271	2.65973	-0.336164	WNT7B;ITGA6;FAM20C;SLC34A1;ITGB4;FOXC1;CA2;GLI3
microtubule organizing center organization (GO:0031023)	8/70	0.318967	0.886356	2.80475	-0.338355	OFD1;SLC16A1;PLK1;CEP135;HAUS7;SSX2IP;BCAS3;GADD45A
BMP signaling pathway (GO:0030509)	8/70	0.318967	0.886356	2.80547	-0.338442	FGF8;CHRDL1;USP9Y;USP9X;TGFBR3;BMPR1B;FAM83G;ACVR1
molting cycle process (GO:0022404)	8/69	0.306381	0.881271	2.68612	-0.3395	ATP7A;FOXE1;TGM3;FZD3;TFAP2C;APCDD1;SOX9;IGFBP5
regulation of biomineral tissue development (GO:0070167)	9/72	0.227363	0.805868	1.57701	-0.340374	ENPP1;KL;CCR1;FAM20C;BMP2K;SOX9;BMPR1B;ANKH;ACVR1
axon extension (GO:0048675)	6/30	0.0734794	0.585439	0.64127	-0.343332	MAPT;USP9X;PPP3CB;SLIT2;DCLK1;SLIT3
monovalent inorganic cation homeostasis (GO:0055067)	10/82	0.230997	0.806928	1.60259	-0.343788	SLC26A4;PDK2;SLC8A1;SLC26A6;RHCG;CA2;CYP4F2;SCN7A;GPR89A;TMPRSS3
regulation of microtubule polymerization or depolymerization (GO:0031110)	6/52	0.349127	0.913764	3.82684	-0.345114	ARHGEF2;MAPT;STMN4;TRPV4;EML4;HDAC6
somatic stem cell maintenance (GO:0035019)	5/44	0.384072	0.932406	4.94379	-0.345998	TFAP2C;KIT;SOX9;PRDM16;LRP5
demethylation (GO:0070988)	6/52	0.349127	0.913764	3.88461	-0.350324	CYP3A5;KDM6A;UTY;CYP2C8;KDM5C;KDM5D
negative regulation of intracellular protein transport (GO:0090317)	9/73	0.238124	0.822678	1.81549	-0.354367	UACA;APOD;TXN;PPM1A;ANXA13;LYPLAL1;SNAI2;PKIA;PBLD
regulation of leukocyte chemotaxis (GO:0002688)	8/68	0.293905	0.864976	2.45644	-0.356316	IL6;AIF1;CCR1;C5;VEGFA;SERPINE1;S100A14;SLIT2
regulation of protein depolymerization (GO:1901879)	8/67	0.281556	0.864976	2.46268	-0.357221	SEMA5A;ARHGEF2;SYNJ1;PDXP;SPTBN1;TRPV4;EML4;HDAC6
amide biosynthetic process (GO:0043604)	5/44	0.384072	0.932406	5.13536	-0.359406	HAGH;ASS1;BDH2;PCSK5;MGST2
negative regulation of lipid metabolic process (GO:0045833)	8/65	0.257297	0.842708	2.10683	-0.360552	APOD;PDGFB;APOE;APOC3;PDE3B;SOD1;SNAI2;NR1H4
protein K48-linked ubiquitination (GO:0070936)	5/44	0.384072	0.932406	5.20144	-0.364031	RNF152;PARK2;UBE2C;KLHL3;RNF146
ceramide metabolic process (GO:0006672)	8/64	0.245418	0.839925	2.09486	-0.365434	ST6GALNAC3;GM2A;ST8SIA6;P2RX1;COL4A3BP;CERK;DEGS2;NEU4
regulation of sodium ion transport (GO:0002028)	8/60	0.199912	0.78572	1.52275	-0.367219	GPD1L;TESC;SERPINE2;FGF14;ANK3;NEDD4;SLC9A3R1;GLRX
positive regulation of osteoblast differentiation (GO:0045669)	7/59	0.305892	0.881271	2.90576	-0.36726	IL6;WNT7B;HEY1;FAM20C;BMPR1B;GLI3;ACVR1
secretion by tissue (GO:0032941)	7/61	0.333242	0.894883	3.30785	-0.367377	ATP7A;VDR;AGPAT6;PRLR;VEGFA;NPR3;CDO1
regulation of cell junction assembly (GO:1901888)	7/50	0.191004	0.78572	1.5261	-0.368028	WDPCP;APOD;VEGFA;SNAI2;BCAS3;FZD5;KDR
neuroepithelial cell differentiation (GO:0060563)	6/32	0.0907206	0.628716	0.794642	-0.368775	FGF8;MLPH;C10ORF11;HPS4;KIT;GLI3
glycosaminoglycan catabolic process (GO:0006027)	7/60	0.319517	0.886356	3.09816	-0.373751	ARSB;GPC6;LUM;HEXA;DCN;AGRN;FGF2
activation of MAPKK activity (GO:0000186)	8/60	0.199912	0.78572	1.55832	-0.375797	MAP3K5;MAP3K15;TNIK;TGFBR1;GADD45B;MAP3K13;GRM1;F2R
acute inflammatory response (GO:0002526)	7/59	0.305892	0.881271	2.97352	-0.375824	IL6;ASS1;KL;PTGES;VNN1;OGG1;ACVR1
regulation of extent of cell growth (GO:0061387)	8/62	0.222234	0.805868	1.75433	-0.378647	SEMA5A;TNFRSF12A;APOE;MAPT;VEGFA;SPG20;SLIT2;ISLR2
regulation of phosphoprotein phosphatase activity (GO:0043666)	6/32	0.0907206	0.628716	0.83734	-0.38859	MAGI2;NUAK1;CMYA5;ITGA1;PDGFRB;CALM1
regulation of establishment of protein localization to plasma membrane (GO:0090003)	5/43	0.367126	0.922038	4.81717	-0.391002	AR;ANXA13;LYPLAL1;PIK3R1;EPHA2
cytosolic calcium ion transport (GO:0060401)	5/43	0.367126	0.922038	4.84831	-0.39353	SLC8A1;PLCG2;ITPR3;FGF2;F2R
response to muscle activity (GO:0014850)	1/13	0.702587	0.988946	35.9272	-0.399339	ADSSL1
regulation of release of sequestered calcium ion into cytosol (GO:0051279)	7/55	0.252788	0.840868	2.31712	-0.401603	F2RL3;SLC8A1;ANK2;CASQ2;F2R;CALM1;THY1
regulation of exit from mitosis (GO:0007096)	1/13	0.702587	0.988946	36.6807	-0.407715	UBE2C
regulation of phosphatidylinositol 3-kinase activity (GO:0043551)	6/36	0.131091	0.722482	1.25609	-0.40831	FLT1;PDGFB;PDGFRB;KIT;FGF2;PIK3R1
positive regulation of reactive oxygen species metabolic process (GO:2000379)	6/38	0.154005	0.76297	1.53785	-0.416044	NOX4;PDGFB;ACE2;PDGFRB;SOD1;GADD45A
cerebral cortex neuron differentiation (GO:0021895)	1/13	0.702587	0.988946	37.4793	-0.416591	PEX5
positive regulation of cellular response to insulin stimulus (GO:1900078)	1/13	0.702587	0.988946	37.6161	-0.418112	OSBPL8
regulation of epithelial to mesenchymal transition (GO:0010717)	7/52	0.214972	0.805868	1.93756	-0.418195	DAB2;HPN;ZNF703;FOXA2;EZH2;TGFBR3;PBLD
embryonic skeletal joint morphogenesis (GO:0060272)	1/13	0.702587	0.988946	37.7566	-0.419673	HOXD11
cellular response to carbohydrate stimulus (GO:0071322)	6/50	0.318943	0.886356	3.48292	-0.420167	NOX4;SLC26A6;APOC3;GRIK5;MLXIPL;PCK2
IMP metabolic process (GO:0046040)	1/13	0.702587	0.988946	37.9278	-0.421576	ADSSL1
cardiac muscle tissue morphogenesis (GO:0055008)	6/50	0.318943	0.886356	3.49579	-0.42172	HEY1;MYL3;DLL4;RXRA;TGFBR3;FOXC1
peptide secretion (GO:0002790)	7/56	0.265816	0.849008	2.58603	-0.423298	IL6;HNF1A;CAMK2G;TRPV4;ABCA1;SLC30A8;PCLO
establishment of planar polarity (GO:0001736)	1/13	0.702587	0.988946	38.1044	-0.423539	FZD3
negative regulation of DNA damage response, signal transduction by p53 class mediator (GO:0043518)	1/13	0.702587	0.988946	38.3866	-0.426675	SNAI2
potassium ion import (GO:0010107)	1/13	0.702587	0.988946	38.4646	-0.427542	SLC12A6
positive regulation of oxidoreductase activity (GO:0051353)	6/38	0.154005	0.76297	1.58069	-0.427634	ATP7A;VDR;APOE;NPR3;GCH1;CALM1
positive regulation of cell fate commitment (GO:0010455)	1/13	0.702587	0.988946	38.5275	-0.428242	FGF2
phospholipase C-activating G-protein coupled receptor signaling pathway (GO:0007200)	7/52	0.214972	0.805868	1.98475	-0.428379	F2RL3;PLCE1;P2RY2;PTH1R;NPR3;SLC9A3R1;F2R
synaptic transmission, dopaminergic (GO:0001963)	1/12	0.675666	0.988946	38.7035	-0.430198	CRHBP
mRNA transcription from RNA polymerase II promoter (GO:0042789)	1/13	0.702587	0.988946	38.8362	-0.431674	SOX17
regulation of ATPase activity (GO:0043462)	5/42	0.350188	0.913764	4.79256	-0.432205	UHRF1;MYL3;ALDOB;RGN;DNAJB1
regulation of ATP catabolic process (GO:1903289)	5/42	0.350188	0.913764	4.8002	-0.432894	UHRF1;MYL3;ALDOB;RGN;DNAJB1
lung-associated mesenchyme development (GO:0060484)	1/11	0.646309	0.988946	39.0791	-0.434373	WNT7B
striated muscle cell differentiation (GO:0051146)	7/53	0.227347	0.805868	2.02111	-0.436229	NOX4;GPR162;ACADM;RXRA;PTPLA;CDH2;IGFBP5
response to salt stress (GO:0009651)	3/25	0.413528	0.957671	10.0963	-0.436672	SLC12A6;TRPV4;KMO
positive regulation of transforming growth factor beta production (GO:0071636)	1/13	0.702587	0.988946	39.3699	-0.437605	SERPINB7
regulation of interleukin-13 production (GO:0032656)	1/12	0.675666	0.988946	39.4656	-0.438669	TNFRSF21
negative regulation of lipid biosynthetic process (GO:0051055)	6/38	0.154005	0.76297	1.62216	-0.438853	PDGFB;APOE;APOC3;SOD1;SNAI2;NR1H4
regulation of Notch signaling pathway (GO:0008593)	7/53	0.227347	0.805868	2.04105	-0.440531	MFNG;HEY1;DTX1;POSTN;TSPAN15;KIT;GALNT11
receptor clustering (GO:0043113)	6/36	0.131091	0.722482	1.35653	-0.440959	GPHN;MAGI2;APOE;DLG4;GRIK5;AGRN
regulation of ventricular cardiac muscle cell membrane repolarization (GO:0060307)	1/12	0.675666	0.988946	39.7188	-0.441483	ANK2
negative regulation of response to reactive oxygen species (GO:1901032)	1/13	0.702587	0.988946	39.8012	-0.4424	TXN
regulation of response to oxidative stress (GO:1902882)	6/49	0.303997	0.879014	3.43632	-0.44313	TXN;VNN1;PARK2;SOD1;HDAC6;SESN3
regulation of tolerance induction (GO:0002643)	1/12	0.675666	0.988946	39.9836	-0.444427	FOXJ1
oocyte development (GO:0048599)	1/13	0.702587	0.988946	40.0085	-0.444703	ZFX
vascular smooth muscle contraction (GO:0014829)	1/13	0.702587	0.988946	40.0129	-0.444753	SLC8A1
neuronal stem cell maintenance (GO:0097150)	1/13	0.702587	0.988946	40.0544	-0.445214	CDH2
positive regulation of insulin secretion (GO:0032024)	7/51	0.202852	0.78572	1.84891	-0.445873	GLUD1;PFKFB2;BLK;MGEA5;PPP3CB;SLC30A8;PCK2
negative regulation of transcription elongation from RNA polymerase II promoter (GO:0034244)	1/11	0.646309	0.988946	40.2723	-0.447636	EZH2
negative T cell selection (GO:0043383)	1/13	0.702587	0.988946	40.2726	-0.447639	GLI3
regulation of development, heterochronic (GO:0040034)	1/12	0.675666	0.988946	40.293	-0.447866	SERPINE2
response to auditory stimulus (GO:0010996)	1/13	0.702587	0.988946	40.3203	-0.448169	STRA6
SMAD protein signal transduction (GO:0060395)	2/16	0.447	0.973703	16.8528	-0.44911	MAGI2;HNF4A
neutrophil mediated immunity (GO:0002446)	1/12	0.675666	0.988946	40.51	-0.450278	IL6
regulation of transcription elongation from RNA polymerase II promoter (GO:0034243)	3/25	0.413528	0.957671	10.4181	-0.450592	DAB2;WDR61;EZH2
positive regulation of leukocyte degranulation (GO:0043302)	1/12	0.675666	0.988946	40.5508	-0.450731	LAMP1
protein-cofactor linkage (GO:0018065)	1/12	0.675666	0.988946	40.5798	-0.451053	LIAS
layer formation in cerebral cortex (GO:0021819)	1/11	0.646309	0.988946	40.7644	-0.453106	GPR56
regulation of cellular extravasation (GO:0002691)	1/13	0.702587	0.988946	40.8669	-0.454244	CCL28
regulation of response to nutrient levels (GO:0032107)	6/49	0.303997	0.879014	3.52277	-0.454278	WDFY3;PPARA;GPR162;ATG7;TBC1D14;SNAI2
trophoblast giant cell differentiation (GO:0060707)	1/12	0.675666	0.988946	40.95	-0.455169	SOCS3
forebrain morphogenesis (GO:0048853)	1/12	0.675666	0.988946	41.0569	-0.456357	FGF8
polyol transport (GO:0015791)	1/9	0.579391	0.988946	41.0952	-0.456782	SLC26A6
astrocyte development (GO:0014002)	1/12	0.675666	0.988946	41.1004	-0.456841	TSPAN2
myotube differentiation (GO:0014902)	1/12	0.675666	0.988946	41.1178	-0.457034	PTPLA
iron coordination entity transport (GO:1901678)	1/12	0.675666	0.988946	41.2317	-0.4583	LCN2
viral protein processing (GO:0019082)	1/12	0.675666	0.988946	41.3477	-0.459589	VPS37B
embryonic skeletal system development (GO:0048706)	6/35	0.120293	0.694111	1.26242	-0.460939	SLC35D1;SULF2;SULF1;HOXB9;PBX1;PCSK5
regulation of growth hormone secretion (GO:0060123)	1/11	0.646309	0.988946	41.497	-0.461249	MGEA5
positive regulation of bone mineralization (GO:0030501)	4/34	0.388074	0.932406	6.59893	-0.461836	KL;FAM20C;BMPR1B;ACVR1
positive regulation of synaptic transmission, GABAergic (GO:0032230)	1/12	0.675666	0.988946	41.5535	-0.461877	CA2
glycosylceramide metabolic process (GO:0006677)	1/13	0.702587	0.988946	41.5834	-0.462209	ST6GALNAC3
regulation of acyl-CoA biosynthetic process (GO:0050812)	1/13	0.702587	0.988946	41.6298	-0.462725	PDK2
positive regulation of protein import into nucleus, translocation (GO:0033160)	1/10	0.614297	0.988946	41.7194	-0.463721	IL6
mechanosensory behavior (GO:0007638)	1/11	0.646309	0.988946	41.826	-0.464906	STRA6
positive regulation of actin cytoskeleton reorganization (GO:2000251)	1/12	0.675666	0.988946	41.849	-0.465162	BCAS3
regulation of germinal center formation (GO:0002634)	1/10	0.614297	0.988946	41.8577	-0.465258	FOXJ1
neuron projection extension (GO:1990138)	6/35	0.120293	0.694111	1.2751	-0.465569	MAPT;USP9X;PPP3CB;SLIT2;DCLK1;SLIT3
negative regulation of receptor activity (GO:2000272)	1/13	0.702587	0.988946	41.9572	-0.466364	CRHBP
neuron fate commitment (GO:0048663)	4/34	0.388074	0.932406	6.66548	-0.466493	TGFBR1;DLL4;LHX6;TFAP2C
positive regulation of systemic arterial blood pressure (GO:0003084)	1/13	0.702587	0.988946	42.0213	-0.467076	WNK1
positive regulation of DNA-dependent DNA replication (GO:2000105)	1/13	0.702587	0.988946	42.0838	-0.467771	CDC7
C21-steroid hormone biosynthetic process (GO:0006700)	1/12	0.675666	0.988946	42.1653	-0.468677	SCP2
negative regulation of T cell mediated immunity (GO:0002710)	1/12	0.675666	0.988946	42.1692	-0.46872	PPP3CB
basement membrane organization (GO:0071711)	1/11	0.646309	0.988946	42.1816	-0.468858	HPN
hemoglobin metabolic process (GO:0020027)	1/11	0.646309	0.988946	42.2012	-0.469076	CAT
negative regulation of BMP signaling pathway (GO:0030514)	6/40	0.178541	0.78572	1.94546	-0.469157	SKOR1;CHRDL1;TRIM33;HTRA1;SPG20;FSTL3
positive regulation of chemokine biosynthetic process (GO:0045080)	1/10	0.614297	0.988946	42.2819	-0.469972	HMOX1
hippocampus development (GO:0021766)	6/39	0.166081	0.772934	1.82483	-0.470007	CYP17A1;USP9X;ZEB2;OGDH;GLI3;HTR5A
regulation of monocyte differentiation (GO:0045655)	1/12	0.675666	0.988946	42.2895	-0.470057	MYC
intrinsic apoptotic signaling pathway by p53 class mediator (GO:0072332)	6/48	0.289183	0.864976	3.24192	-0.470253	FHIT;PDK2;PYCARD;EDA2R;RPS27L;RRP8
ribosomal large subunit biogenesis (GO:0042273)	1/13	0.702587	0.988946	42.491	-0.472297	WDR12
presynaptic membrane organization (GO:0097090)	1/11	0.646309	0.988946	42.5002	-0.4724	PTPRD
hypothalamus development (GO:0021854)	1/13	0.702587	0.988946	42.5223	-0.472645	RAX
negative regulation of interleukin-17 production (GO:0032700)	1/10	0.614297	0.988946	42.5586	-0.473048	PRNP
regulation of cytokinesis (GO:0032465)	6/48	0.289183	0.864976	3.26548	-0.47367	CSPP1;IGF1R;CXCR5;PDXP;BIRC6;CALM1
regulation of cholesterol transport (GO:0032374)	6/34	0.109955	0.663272	1.15504	-0.474225	APOE;APOC3;LIPG;ABCA1;SCP2;ABCG1
purinergic receptor signaling pathway (GO:0035587)	3/25	0.413528	0.957671	10.988	-0.47524	P2RX1;P2RY2;P2RX3
epithelial cell fate commitment (GO:0072148)	1/10	0.614297	0.988946	42.7643	-0.475334	ACVR1
regulation of Wnt signaling pathway, planar cell polarity pathway (GO:2000095)	1/11	0.646309	0.988946	42.7679	-0.475375	DAB2
regulation of sister chromatid cohesion (GO:0007063)	1/11	0.646309	0.988946	42.7864	-0.475581	NSMCE2
mesonephric epithelium development (GO:0072163)	6/45	0.24579	0.839925	2.72796	-0.475874	TCF21;FOXC1;CAT;FGF1;SLIT2;WT1
positive regulation of triglyceride biosynthetic process (GO:0010867)	1/11	0.646309	0.988946	42.828	-0.476043	LDLR
peristalsis (GO:0030432)	1/9	0.579391	0.988946	43.0113	-0.47808	P2RX3
chaperone-mediated protein complex assembly (GO:0051131)	1/13	0.702587	0.988946	43.0387	-0.478385	HSPD1
regulation of circadian sleep/wake cycle (GO:0042749)	2/16	0.447	0.973703	17.9534	-0.478441	IL6;ALB
regulation of circadian sleep/wake cycle, sleep (GO:0045187)	2/16	0.447	0.973703	17.9569	-0.478533	IL6;ALB
DNA synthesis involved in DNA repair (GO:0000731)	1/13	0.702587	0.988946	43.0567	-0.478585	POLD3
regulation of gamma-delta T cell activation (GO:0046643)	1/12	0.675666	0.988946	43.0947	-0.479008	RORC
negative regulation of glycoprotein metabolic process (GO:1903019)	1/13	0.702587	0.988946	43.0958	-0.47902	MGEA5
lens fiber cell development (GO:0070307)	1/10	0.614297	0.988946	43.136	-0.479466	WNT7B
negative regulation of interleukin-1 beta production (GO:0032691)	1/11	0.646309	0.988946	43.1395	-0.479505	ACP5
regulation of platelet aggregation (GO:0090330)	1/12	0.675666	0.988946	43.2198	-0.480398	SERPINE2
negative regulation of appetite (GO:0032099)	1/10	0.614297	0.988946	43.2607	-0.480853	PPARA
striatum development (GO:0021756)	1/11	0.646309	0.988946	43.2741	-0.481002	OGDH
somatic stem cell division (GO:0048103)	2/16	0.447	0.973703	18.0806	-0.481828	KIT;ASPM
deoxyribonucleotide biosynthetic process (GO:0009263)	1/12	0.675666	0.988946	43.3677	-0.482042	RRM2
purine nucleobase biosynthetic process (GO:0009113)	1/12	0.675666	0.988946	43.3695	-0.482061	SHMT1
microtubule bundle formation (GO:0001578)	6/40	0.178541	0.78572	2.00157	-0.48269	OFD1;MAP1S;RSPH1;PLK1;SPEF2;MAP7
nonmotile primary cilium assembly (GO:0035058)	1/12	0.675666	0.988946	43.4567	-0.483031	PCDH15
positive regulation of microtubule polymerization (GO:0031116)	1/11	0.646309	0.988946	43.4865	-0.483362	MAPT
developmental pigmentation (GO:0048066)	1/13	0.702587	0.988946	43.5234	-0.483773	ZEB2
coenzyme A biosynthetic process (GO:0015937)	1/11	0.646309	0.988946	43.6028	-0.484655	PANK1
positive regulation of tyrosine phosphorylation of Stat5 protein (GO:0042523)	2/16	0.447	0.973703	18.1937	-0.484844	KIT;GHR
peptide hormone processing (GO:0016486)	6/33	0.100094	0.644875	1.10988	-0.486901	REN;ACE2;MME;ANPEP;ENPEP;PCSK5
regulation of cAMP-dependent protein kinase activity (GO:2000479)	1/11	0.646309	0.988946	43.874	-0.487669	PKIA
detection of mechanical stimulus (GO:0050982)	6/39	0.166081	0.772934	1.89371	-0.487748	HPN;SERPINE2;ASIC2;PCDH15;KIT;DENND5B
neuronal ion channel clustering (GO:0045161)	1/12	0.675666	0.988946	43.8822	-0.48776	AGRN
inner ear development (GO:0048839)	6/46	0.260053	0.842708	2.85703	-0.488939	MAF;HOXA1;FREM2;LHX3;PDGFRB;SPARC
regulation of G2/M transition of mitotic cell cycle (GO:0010389)	4/34	0.388074	0.932406	6.9872	-0.48901	CDC7;PTPLA;PBX1;PKIA
positive regulation of catenin import into nucleus (GO:0035413)	1/11	0.646309	0.988946	44.0192	-0.489284	SEMA5A
positive regulation of chemokine production (GO:0032722)	5/41	0.333292	0.894883	4.4117	-0.489974	IL6;IL1RL1;HMOX1;C5;PYCARD
eyelid development in camera-type eye (GO:0061029)	1/11	0.646309	0.988946	44.106	-0.490248	STRA6
head development (GO:0060322)	1/11	0.646309	0.988946	44.1464	-0.490697	STRA6
negative regulation of intracellular estrogen receptor signaling pathway (GO:0033147)	1/11	0.646309	0.988946	44.2847	-0.492235	CRIPAK
neural tube formation (GO:0001841)	1/11	0.646309	0.988946	44.2959	-0.492359	MIB1
negative regulation of response to food (GO:0032096)	1/10	0.614297	0.988946	44.3574	-0.493043	PPARA
positive regulation of oligodendrocyte differentiation (GO:0048714)	1/12	0.675666	0.988946	44.3678	-0.493158	ASPA
eye morphogenesis (GO:0048592)	6/45	0.24579	0.839925	2.82885	-0.493473	RARG;ALDH1A3;VEGFA;GLI3;LRP5;EPHB2
substrate-dependent cell migration (GO:0006929)	1/10	0.614297	0.988946	44.6147	-0.495903	PDGFB
regulation of macrophage chemotaxis (GO:0010758)	1/10	0.614297	0.988946	44.6269	-0.496038	C5
response to leptin (GO:0044321)	1/12	0.675666	0.988946	44.6285	-0.496056	NR1D1
regulation of extrinsic apoptotic signaling pathway via death domain receptors (GO:1902041)	6/45	0.24579	0.839925	2.84392	-0.496103	ARHGEF2;TRPS1;HMOX1;SERPINE1;SKIL;BMPR1B
positive regulation of endothelial cell apoptotic process (GO:2000353)	1/11	0.646309	0.988946	44.635	-0.496128	ANO6
mitochondrial respiratory chain complex I biogenesis (GO:0097031)	2/16	0.447	0.973703	18.6182	-0.496157	AIFM1;COA1
linoleic acid metabolic process (GO:0043651)	1/12	0.675666	0.988946	44.6651	-0.496463	ELOVL2
dendritic cell chemotaxis (GO:0002407)	2/16	0.447	0.973703	18.644	-0.496844	CCR1;ANO6
mitochondrial respiratory chain complex I assembly (GO:0032981)	2/16	0.447	0.973703	18.645	-0.496869	AIFM1;COA1
chaperone mediated protein folding requiring cofactor (GO:0051085)	1/11	0.646309	0.988946	44.7953	-0.49791	DNAJB1
negative regulation of bone resorption (GO:0045779)	1/10	0.614297	0.988946	44.869	-0.49873	VEGFA
midgut development (GO:0007494)	1/10	0.614297	0.988946	44.9527	-0.49966	ASS1
substrate-independent telencephalic tangential migration (GO:0021826)	1/8	0.541328	0.988946	44.9667	-0.499815	LHX6
histone H3-K4 methylation (GO:0051568)	3/25	0.413528	0.957671	11.5638	-0.500141	KDM6A;WDR61;SETD3
negative regulation of Ras GTPase activity (GO:0034261)	1/11	0.646309	0.988946	45.0515	-0.500758	BCAS3
mammary gland epithelial cell differentiation (GO:0060644)	2/16	0.447	0.973703	18.8176	-0.501471	ZNF703;PRLR
tolerance induction (GO:0002507)	1/8	0.541328	0.988946	45.152	-0.501875	FOXJ1
positive regulation of tyrosine phosphorylation of Stat1 protein (GO:0042511)	1/9	0.579391	0.988946	45.1826	-0.502215	KIT
negative regulation of epidermal cell differentiation (GO:0045605)	1/11	0.646309	0.988946	45.1829	-0.502218	EZH2
negative regulation of behavior (GO:0048521)	6/41	0.191364	0.78572	2.08366	-0.502486	SEMA5A;AIF1;C5;ANGPT2;PTPRO;SLIT2
mitotic cell cycle arrest (GO:0071850)	1/11	0.646309	0.988946	45.2329	-0.502774	MAGI2
regulation of peroxisome proliferator activated receptor signaling pathway (GO:0035358)	1/11	0.646309	0.988946	45.2564	-0.503036	PTGIS
G-protein coupled purinergic nucleotide receptor signaling pathway (GO:0035589)	1/11	0.646309	0.988946	45.2899	-0.503408	P2RY2
triglyceride-rich lipoprotein particle remodeling (GO:0034370)	1/9	0.579391	0.988946	45.3163	-0.503701	APOE
regulation of neuronal synaptic plasticity (GO:0048168)	6/47	0.274526	0.853019	3.17526	-0.504783	SHISA9;APOE;DLG4;KIT;DBN1;EPHB2
somite development (GO:0061053)	1/10	0.614297	0.988946	45.4553	-0.505247	FRZB
ubiquinone metabolic process (GO:0006743)	1/12	0.675666	0.988946	45.4846	-0.505571	PDSS1
negative regulation of cardiac muscle tissue development (GO:0055026)	2/16	0.447	0.973703	18.9762	-0.505697	FGF8;FGF3
regulation of triglyceride biosynthetic process (GO:0010866)	2/16	0.447	0.973703	18.988	-0.506011	LDLR;THRSP
positive regulation of Rac GTPase activity (GO:0032855)	6/46	0.260053	0.842708	2.95831	-0.506271	ALS2;ARHGEF2;EPS8L1;EPHA2;SRGAP2;FARP2
negative regulation of protein autophosphorylation (GO:0031953)	1/10	0.614297	0.988946	45.6139	-0.507009	ENPP1
diol metabolic process (GO:0034311)	1/11	0.646309	0.988946	45.7672	-0.508713	DEGS2
endothelial cell morphogenesis (GO:0001886)	1/12	0.675666	0.988946	45.7761	-0.508812	HEG1
mitochondrion distribution (GO:0048311)	1/10	0.614297	0.988946	45.9451	-0.51069	BHLHA15
female mating behavior (GO:0060180)	1/10	0.614297	0.988946	46.0104	-0.511416	PPP1R1B
inositol metabolic process (GO:0006020)	1/12	0.675666	0.988946	46.0299	-0.511633	MIOX
urea cycle (GO:0000050)	1/11	0.646309	0.988946	46.0998	-0.51241	ASS1
positive regulation of Cdc42 GTPase activity (GO:0043089)	1/10	0.614297	0.988946	46.2096	-0.51363	BCAS3
positive regulation of tolerance induction (GO:0002645)	1/9	0.579391	0.988946	46.2182	-0.513726	FOXJ1
kidney morphogenesis (GO:0060993)	1/11	0.646309	0.988946	46.2446	-0.51402	WNT7B
cardiac muscle contraction (GO:0060048)	5/41	0.333292	0.894883	4.63004	-0.514223	SLC8A1;ANK2;MYL3;PPP1R13L;CASQ2
regulation of early endosome to late endosome transport (GO:2000641)	1/11	0.646309	0.988946	46.3632	-0.515337	DAB2
actin cytoskeleton reorganization (GO:0031532)	6/41	0.191364	0.78572	2.13802	-0.515593	MICALL2;TNIK;NPHS2;TRPV4;KIT;FARP2
retrograde transport, vesicle recycling within Golgi (GO:0000301)	2/16	0.447	0.973703	19.3784	-0.516415	CUX1;GOLGA4
protein import into peroxisome matrix (GO:0016558)	1/11	0.646309	0.988946	46.5903	-0.517862	PEX5
embryonic body morphogenesis (GO:0010172)	1/10	0.614297	0.988946	46.646	-0.51848	OFD1
negative regulation of bone mineralization (GO:0030502)	2/16	0.447	0.973703	19.4718	-0.518904	CCR1;SOX9
response to redox state (GO:0051775)	1/11	0.646309	0.988946	46.6844	-0.518908	ADH5
regulation of tyrosine phosphorylation of Stat3 protein (GO:0042516)	4/33	0.368687	0.922347	6.42048	-0.518994	IL6;CLCF1;KIT;GHR
regulation of polysaccharide metabolic process (GO:0032881)	5/41	0.333292	0.894883	4.67776	-0.519524	KHK;GRB10;PDGFB;ENPP1;C1QTNF2
ear development (GO:0043583)	1/9	0.579391	0.988946	46.7456	-0.519588	STRA6
regulation of pigment cell differentiation (GO:0050932)	1/9	0.579391	0.988946	46.7463	-0.519596	ZEB2
regulation of gamma-delta T cell differentiation (GO:0045586)	1/10	0.614297	0.988946	46.7693	-0.519852	RORC
establishment of viral latency (GO:0019043)	1/10	0.614297	0.988946	46.825	-0.52047	HMGA1
regulation of hydrogen peroxide metabolic process (GO:0010310)	1/10	0.614297	0.988946	46.8496	-0.520744	HDAC6
CD4-positive or CD8-positive, alpha-beta T cell lineage commitment (GO:0043369)	1/8	0.541328	0.988946	46.8938	-0.521235	IL6
negative regulation of alpha-beta T cell differentiation (GO:0046639)	1/11	0.646309	0.988946	46.9358	-0.521702	GLI3
positive regulation of vasculogenesis (GO:2001214)	1/10	0.614297	0.988946	46.951	-0.521871	KDR
killing of cells in other organism involved in symbiotic interaction (GO:0051883)	1/10	0.614297	0.988946	46.9765	-0.522154	ALB
cellular zinc ion homeostasis (GO:0006882)	1/10	0.614297	0.988946	47.1109	-0.523649	SLC30A8
positive regulation of cell cycle checkpoint (GO:1901978)	1/9	0.579391	0.988946	47.123	-0.523783	NDRG1
oligosaccharide metabolic process (GO:0009311)	6/41	0.191364	0.78572	2.17237	-0.523877	GAL3ST3;GM2A;MAN1A2;ST8SIA6;ST3GAL6;NEU4
glucocorticoid biosynthetic process (GO:0006704)	1/10	0.614297	0.988946	47.1498	-0.524081	CYP17A1
regulation of cellular amide metabolic process (GO:0034248)	2/16	0.447	0.973703	19.6847	-0.524578	APOE;NR1H4
nephron tubule morphogenesis (GO:0072078)	1/11	0.646309	0.988946	47.2048	-0.524692	KLHL3
regulation of short-term neuronal synaptic plasticity (GO:0048172)	1/10	0.614297	0.988946	47.2139	-0.524793	SHISA9
regulation of apoptotic cell clearance (GO:2000425)	1/10	0.614297	0.988946	47.2584	-0.525288	C4A
response to manganese ion (GO:0010042)	1/12	0.675666	0.988946	47.4436	-0.527346	PARK2
regulation of female gonad development (GO:2000194)	1/10	0.614297	0.988946	47.4661	-0.527597	WT1
negative regulation of T cell differentiation in thymus (GO:0033085)	1/8	0.541328	0.988946	47.5806	-0.528869	FOXJ1
anterior/posterior axis specification, embryo (GO:0008595)	1/10	0.614297	0.988946	47.7004	-0.530201	FZD5
glutathione biosynthetic process (GO:0006750)	2/16	0.447	0.973703	19.9004	-0.530325	HAGH;MGST2
nephron epithelium morphogenesis (GO:0072088)	1/11	0.646309	0.988946	48.0263	-0.533824	KLHL3
presynaptic membrane assembly (GO:0097105)	1/9	0.579391	0.988946	48.0365	-0.533936	PTPRD
regulation of phospholipase A2 activity (GO:0032429)	1/9	0.579391	0.988946	48.0856	-0.534482	PLA2R1
regulation of extracellular matrix disassembly (GO:0010715)	1/9	0.579391	0.988946	48.1064	-0.534714	DPP4
neurofilament cytoskeleton organization (GO:0060052)	1/10	0.614297	0.988946	48.1353	-0.535035	SOD1
amino acid import (GO:0043090)	1/12	0.675666	0.988946	48.1506	-0.535205	SLC3A2
cardiocyte differentiation (GO:0035051)	5/40	0.316471	0.886356	4.44313	-0.536003	NOX4;GPR162;ACADM;RXRA;SOX17
locomotory exploration behavior (GO:0035641)	1/9	0.579391	0.988946	48.247	-0.536276	DLG4
negative regulation of metanephros development (GO:0072217)	1/9	0.579391	0.988946	48.2718	-0.536552	WT1
bone development (GO:0060348)	5/40	0.316471	0.886356	4.44949	-0.536771	FGF8;SULF2;SULF1;SPARC;LRP5
phospholipid scrambling (GO:0017121)	1/10	0.614297	0.988946	48.3066	-0.536938	ANO6
central nervous system myelination (GO:0022010)	1/9	0.579391	0.988946	48.3783	-0.537736	ASPA
regulation of viral-induced cytoplasmic pattern recognition receptor signaling pathway (GO:0039531)	1/10	0.614297	0.988946	48.6435	-0.540684	BIRC2
protoporphyrinogen IX biosynthetic process (GO:0006782)	1/9	0.579391	0.988946	48.7494	-0.541861	ALAD
regulation of attachment of spindle microtubules to kinetochore (GO:0051988)	1/11	0.646309	0.988946	48.8548	-0.543033	SPAG5
phosphatidylinositol phosphorylation (GO:0046854)	6/34	0.109955	0.663272	1.32455	-0.543822	PIKFYVE;PIP5K1B;PI4KA;PIP4K2A;PIK3R1;IP6K2
glucose catabolic process (GO:0006007)	2/16	0.447	0.973703	20.436	-0.544598	PFKFB2;LRP5
activation of Rac GTPase activity (GO:0032863)	1/10	0.614297	0.988946	49.0273	-0.54495	EPHA2
positive regulation of gastrulation (GO:2000543)	1/9	0.579391	0.988946	49.0732	-0.54546	FOXA2
pyrimidine-containing compound salvage (GO:0008655)	1/10	0.614297	0.988946	49.0875	-0.545618	UPP2
regulation of clathrin-mediated endocytosis (GO:2000369)	1/10	0.614297	0.988946	49.104	-0.545802	DAB2
morphogenesis of an endothelium (GO:0003159)	1/8	0.541328	0.988946	49.1444	-0.546251	DLL4
purine nucleobase metabolic process (GO:0006144)	5/40	0.316471	0.886356	4.55135	-0.549058	SHMT1;GDA;ADSSL1;CAT;NT5E
positive regulation of steroid biosynthetic process (GO:0010893)	5/14	0.0169316	0.279944	0.431645	-0.549556	IGF1R;CYP17A1;NR1D1;FGF1;ABCG1
neuron recognition (GO:0008038)	4/33	0.368687	0.922347	6.82857	-0.551982	SEMA5A;OPCML;EPHB3;EPHB2
positive regulation of insulin receptor signaling pathway (GO:0046628)	1/9	0.579391	0.988946	49.6961	-0.552383	OSBPL8
positive regulation of hematopoietic progenitor cell differentiation (GO:1901534)	1/9	0.579391	0.988946	49.7054	-0.552487	TESC
ubiquinone biosynthetic process (GO:0006744)	1/11	0.646309	0.988946	49.7388	-0.552858	PDSS1
peroxisome fission (GO:0016559)	1/10	0.614297	0.988946	49.8363	-0.553942	ACOX1
neuromuscular process controlling posture (GO:0050884)	1/10	0.614297	0.988946	49.8568	-0.55417	GCH1
positive regulation of inositol phosphate biosynthetic process (GO:0060732)	1/9	0.579391	0.988946	49.8971	-0.554618	PTH1R
N-glycan processing (GO:0006491)	1/10	0.614297	0.988946	49.9583	-0.555298	MAN1A2
protein targeting to lysosome (GO:0006622)	1/11	0.646309	0.988946	50.0295	-0.55609	NEDD4
positive regulation of digestive system process (GO:0060456)	1/9	0.579391	0.988946	50.1	-0.556873	SLC22A5
endothelial tube morphogenesis (GO:0061154)	1/8	0.541328	0.988946	50.1609	-0.55755	DLL4
hepatocyte apoptotic process (GO:0097284)	1/9	0.579391	0.988946	50.2494	-0.558534	KRT18
mitotic sister chromatid cohesion (GO:0007064)	1/9	0.579391	0.988946	50.2807	-0.558881	SMC1A
phospholipase C-activating dopamine receptor signaling pathway (GO:0060158)	1/8	0.541328	0.988946	50.29	-0.558985	SLC9A3R1
regulation of lipid kinase activity (GO:0043550)	6/42	0.204525	0.78572	2.31954	-0.559368	FLT1;PDGFB;PDGFRB;KIT;FGF2;PIK3R1
sarcoplasmic reticulum calcium ion transport (GO:0070296)	1/10	0.614297	0.988946	50.4358	-0.560606	ANK2
regulation of posttranscriptional gene silencing (GO:0060147)	1/9	0.579391	0.988946	50.4823	-0.561122	DND1
response to parathyroid hormone (GO:0071107)	1/8	0.541328	0.988946	50.583	-0.562241	SLC34A1
positive regulation of potassium ion transmembrane transporter activity (GO:1901018)	1/9	0.579391	0.988946	50.6283	-0.562745	ANK2
cell wall macromolecule metabolic process (GO:0044036)	1/11	0.646309	0.988946	50.7136	-0.563693	LYZ
negative regulation of mast cell activation (GO:0033004)	1/8	0.541328	0.988946	50.79	-0.564543	HMOX1
[truncated: 542 more rows]
